# Supplementary material for: Automated Conditional Screening of Escherichia Coli Knockout Mutants in Parallel Adaptive Fed-Batch Cultivations
Source: Preprints.org preprint supplement (doi:10.20944/preprints202009.0381.v1), 2020-09-17
Supplement: Supplementary file 1 [file supplementary]

## Sheet: Strain 1
Escherichia coli W3110
Biomass		Acetate		Glucose		DOT
Time [h]	Values [g/L]	Time [h]	Values [g/L]	Time [h]	Values [g/L]	Time [h]	Values [%]
0.0792	2.68712	0.5603	0.296633	0.5603	2.70914	0.0069	89.66
0.0792	2.69924	0.5603	0.323102	0.5603	2.7208	0.0069	90.56
0.1156	2.72348	0.8592	0.238022	0.8592	1.50204	0.0069	90.97
0.1156	2.82045	0.8592	0.28907	1.1567	0.00612793	0.0097	89.44
0.1522	3.15985	1.4631	0.319321	1.4631	2.09912	0.0097	91.01
0.1522	3.19621	1.7622	0.368478	1.4631	4.36825	0.0097	90.55
0.5603	3.64242	1.7622	0.358079	1.7622	1.66912	0.0125	89.59
0.5603	3.71515	2.0658	0.0529387	1.7622	2.14186	0.0125	90.85
0.8592	3.78788	2.0658	0.0553568	2.0658	0.0222933	0.0125	90.56
0.8592	3.95758	2.4069	0.103718	2.0658	0.0169363	0.0153	89.76
1.1567	4.00606	2.4069	0.0867919	2.4069	0.0182755	0.0153	90.33
1.1567	4.2	2.7531	0.0158615	2.4069	0.026311	0.0153	90.83
1.4631	4.29697	2.7531	0.0513267	2.7531	0.0169363	0.0181	89.43
1.4631	4.49091	3.1097	0.0521327	3.1097	0.0142578	0.0181	90.78
1.7622	4.51515	3.1097	0.060193	3.1097	0.0115793	0.0181	90.61
1.7622	5	3.4567	0.110167	3.4567	0.020954	0.0219	88.48
2.0658	5.31818	3.4567	0.129511	3.4567	0.0182755	0.0219	90.34
2.0658	5.39091	3.7817	0.0418324	3.7817	0.033888	0.0219	90.66
2.4069	5.46364	3.7817	0.0471008	3.7817	0.0226988	0.0394	89.21
2.4069	5.46364	4.1256	0.00600706	4.1256	0.0264285	0.0394	90.37
2.7531	5.53636	4.1256	0.00073863	4.1256	0.023942	0.0394	89.78
2.7531	5.76894	4.8667	0.309469	4.4836	0.0102664	0.0572	89.29
3.1097	5.97273	4.8667	0.325274	4.8667	0.0214555	0.0572	90.67
3.1097	6.19091	5.1833	0.107161	4.8667	0.0264285	0.0572	89.84
3.4567	6.22727	5.1833	0.111376	5.1833	0.0177258	0.0739	89.42
3.4567	6.44545	5.5056	0.396749	5.1833	0.0214555	0.0739	90.64
3.7817	6.62727	5.8308	0.11945	5.5056	0.000941822	0.0739	90.56
3.7817	7.24318	6.4694	0.506397	5.5056	0.15244	0.0906	89.29
4.1256	7.49773	6.4694	0.565194	5.8308	0.000941822	0.0906	90.78
4.1256	7.60682	6.8183	0.152821	5.8308	0.0347583	0.0906	90.6
4.4836	7.64318	7.1431	0.0494469	6.1489	0.0049998	0.1072	89.44
4.4836	7.71591	7.1431	0.122292	6.4694	0.00229448	0.1072	90.96
4.8667	7.75227	7.4639	0.497661	6.4694	4.15495	0.1072	90.45
4.8667	7.825	7.4639	0.525085	6.8183	0.00770511	0.1239	89.83
5.1833	7.825	8.1381	0.101724	7.1431	0.00330659	0.1239	88.39
5.1833	7.93636	8.1381	0.197709	7.1431	0.0401512	0.1239	90.3
5.5056	8.00682	8.4594	0.502803	7.4639	3.62043	0.1406	89.6
5.5056	8.11818	8.4594	0.472808	7.4639	3.84785	0.1406	89.76
5.8308	8.15227	12.9711	0.524191	7.7864	0.0071181	0.1406	90.21
5.8308	8.18864			8.1381	0.00330659	0.1572	89.99
6.1489	8.18864			8.1381	0.0299872	0.1572	89.99
6.1489	8.29773			8.4594	0.00076558	0.1572	90.32
6.4694	8.47955			8.4594	3.74875	0.1739	89.9
6.4694	8.73636			12.9364	0.00747716	0.1739	90.33
6.8183	8.91818			12.9364	4.04085	0.1739	90.42
6.8183	9.28182			12.9711	0.00367687	0.1906	89.82
7.1431	9.68182			12.9711	0.00747716	0.1906	90.47
7.1431	9.71818			13.0061	0.0125442	0.1906	90.61
7.4639	9.89773			13.0061	0.0062104	0.2072	89.73
7.4639	9.9					0.2072	90.47
7.7864	9.93636					0.2072	89.83
7.7864	10.0455					0.2239	89.82
8.1381	10.2977					0.2239	90.28
8.1381	10.4432					0.2239	90.76
8.4594	10.5523					0.2406	89.67
8.4594	10.7341					0.2406	90.92
12.9364	10.7341					0.2406	90.19
12.9711	13.3447					0.2572	90.23
12.9711	13.4053					0.2572	90.84
13.0061	14.678					0.2572	90.37
13.0061	15.7083					0.2739	90.15
						0.2739	90.6
						0.2739	90.37
						0.2906	90.11
						0.2906	90.59
						0.2906	90.66
						0.3072	90.08
						0.3072	90.77
						0.3072	90.73
						0.3239	85.49
						0.3239	89.2
						0.3239	90.4
						0.3406	72.5
						0.3406	72.64
						0.3406	73.49
						0.3572	69.62
						0.3572	70.49
						0.3572	70.63
						0.3739	67.78
						0.3739	69.51
						0.3739	69.82
						0.3906	65.55
						0.3906	66.46
						0.3906	66.58
						0.4072	63.97
						0.4072	63.78
						0.4072	64.03
						0.4239	62.47
						0.4239	61.66
						0.4239	61.59
						0.4406	62.43
						0.4406	60.59
						0.4406	60.17
						0.4572	61.7
						0.4572	59.75
						0.4572	58.62
						0.4739	60.61
						0.4739	59.3
						0.4739	59.32
						0.4906	60.81
						0.4906	59.15
						0.4906	58.18
						0.5072	60.41
						0.5072	58.69
						0.5072	57.44
						0.5239	60.18
						0.5239	58.79
						0.5239	58.88
						0.5406	60.12
						0.5406	58.68
						0.5406	58.21
						0.5572	60.43
						0.5572	58.91
						0.5572	58.48
						0.5739	60.54
						0.5739	57.97
						0.5739	59
						0.5906	59.43
						0.5906	58.42
						0.5906	57.59
						0.6072	59.21
						0.6072	58.8
						0.6072	58.03
						0.6239	59.58
						0.6239	58.4
						0.6239	58.08
						0.6406	59.47
						0.6406	58.21
						0.6406	56.22
						0.6572	59.61
						0.6572	57.45
						0.6572	58.09
						0.6739	59.26
						0.6739	57.93
						0.6739	58.12
						0.6906	58.87
						0.6906	58.06
						0.6906	58.03
						0.7072	58.97
						0.7072	57.51
						0.7072	57.41
						0.7239	59.01
						0.7239	56.97
						0.7239	57.16
						0.7406	59.54
						0.7406	57.46
						0.7406	56.57
						0.7572	59.25
						0.7572	57.91
						0.7572	56.74
						0.7739	59.84
						0.7739	57.21
						0.7739	57.49
						0.7906	60.09
						0.7906	57.08
						0.7906	57.02
						0.8072	60.61
						0.8072	57.91
						0.8072	56.15
						0.8239	60.16
						0.8239	56.23
						0.8239	55.1
						0.8406	59.98
						0.8406	55.73
						0.8406	54.93
						0.8572	60.16
						0.8572	56.36
						0.8572	55.62
						0.8739	60.35
						0.8739	56.79
						0.8739	55.54
						0.8906	60.79
						0.8906	56.5
						0.8906	55.84
						0.9072	60.56
						0.9072	56.03
						0.9072	55.41
						0.9239	60.33
						0.9239	55.75
						0.9239	55
						0.9406	60.3
						0.9406	55.6
						0.9406	54.69
						0.9572	60.47
						0.9572	54.68
						0.9572	53.7
						0.9739	60.55
						0.9739	54.11
						0.9739	52.94
						0.9906	60.29
						0.9906	54.12
						0.9906	52.51
						1.0072	60.39
						1.0072	53.98
						1.0072	53.64
						1.0239	59.97
						1.0239	53.41
						1.0239	51.16
						1.0406	58.94
						1.0406	52.86
						1.0406	52.79
						1.0572	59.67
						1.0572	52.58
						1.0572	50.74
						1.0739	59.1
						1.0739	52.84
						1.0739	51.11
						1.0906	59.24
						1.0906	52.03
						1.0906	50.39
						1.1072	58.55
						1.1072	52.06
						1.1072	49.97
						1.1239	57.89
						1.1239	50.7
						1.1239	50.27
						1.1406	62.2
						1.1406	50.21
						1.1406	49.36
						1.1572	76.92
						1.1572	50.03
						1.1572	48.28
						1.1739	78.69
						1.1739	49.67
						1.1739	47.08
						1.1906	78.45
						1.1906	49.04
						1.1906	57.19
						1.2072	80.33
						1.2072	48.1
						1.2072	72.68
						1.2239	83.19
						1.2239	49.32
						1.2239	75.56
						1.2406	84.42
						1.2406	71.91
						1.2406	75.84
						1.2572	85.2
						1.2572	75.66
						1.2572	79.05
						1.2739	85.71
						1.2739	76.02
						1.2739	82.07
						1.2906	86.33
						1.2906	77.55
						1.2906	83.81
						1.3072	86.62
						1.3072	82.95
						1.3072	84.21
						1.3239	87.08
						1.3239	83.95
						1.3239	85.23
						1.3406	87.31
						1.3406	84.9
						1.3406	85.78
						1.3572	87.51
						1.3572	85.75
						1.3572	86.2
						1.3739	88
						1.3739	86.15
						1.3739	86.21
						1.3906	88.18
						1.3906	86.69
						1.3906	87.11
						1.4072	88.47
						1.4072	87.37
						1.4072	86.81
						1.4239	82.39
						1.4239	84.69
						1.4239	86.75
						1.4406	65.54
						1.4406	61.38
						1.4406	62.95
						1.4572	63.32
						1.4572	59.15
						1.4572	59.2
						1.4739	61.57
						1.4739	56.38
						1.4739	57.33
						1.4906	57.88
						1.4906	53.15
						1.4906	54.11
						1.5072	55.83
						1.5072	49.53
						1.5072	50.93
						1.5239	54.42
						1.5239	46.65
						1.5239	48.67
						1.5406	53.06
						1.5406	45.37
						1.5406	46.81
						1.5572	52.22
						1.5572	44.62
						1.5572	45.14
						1.5739	51.06
						1.5739	42.29
						1.5739	44.49
						1.5906	51.35
						1.5906	42.59
						1.5906	43.01
						1.6072	51.33
						1.6072	42.93
						1.6072	43.04
						1.6239	50.25
						1.6239	42.44
						1.6239	42.8
						1.6406	50.09
						1.6406	42.05
						1.6406	42.08
						1.6572	50.59
						1.6572	41.78
						1.6572	40.82
						1.6739	50.01
						1.6739	40.14
						1.6739	41.9
						1.6906	49.42
						1.6906	40.65
						1.6906	39.31
						1.7072	49.36
						1.7072	39.08
						1.7072	39.27
						1.7239	48.98
						1.7239	37.27
						1.7239	40.43
						1.7406	48.52
						1.7406	38.92
						1.7406	40.18
						1.7572	48.47
						1.7572	38.77
						1.7572	40.46
						1.7739	48.03
						1.7739	37.42
						1.7739	37.65
						1.7906	47.26
						1.7906	37.87
						1.7906	37.46
						1.8072	46.82
						1.8072	38.18
						1.8072	38.07
						1.8239	46.7
						1.8239	37.73
						1.8239	37.51
						1.8406	46.29
						1.8406	35.5
						1.8406	37.15
						1.8572	46.66
						1.8572	35.71
						1.8572	35.57
						1.8739	46.21
						1.8739	36.21
						1.8739	37.01
						1.8906	45.67
						1.8906	36.14
						1.8906	37.79
						1.9072	45.71
						1.9072	35.83
						1.9072	35.63
						1.9239	45.76
						1.9239	35.74
						1.9239	35.34
						1.9406	46.77
						1.9406	32.57
						1.9406	33.19
						1.9572	48.48
						1.9572	32.14
						1.9572	32.85
						1.9739	71.01
						1.9739	34.45
						1.9739	35.27
						1.9906	76.84
						1.9906	33.83
						1.9906	60.92
						2.0072	77.77
						2.0072	59.41
						2.0072	70.86
						2.0239	78.37
						2.0239	71.43
						2.0239	73.63
						2.0406	78.95
						2.0406	73.55
						2.0406	74.25
						2.0572	79.35
						2.0572	73.94
						2.0572	75.15
						2.0739	79.68
						2.0739	74.51
						2.0739	75
						2.0906	79.03
						2.0906	75.06
						2.0906	76.24
						2.1072	79.45
						2.1072	75.7
						2.1072	80.08
						2.1239	81.8
						2.1239	81.81
						2.1239	81.64
						2.1406	56.8
						2.1406	50.6
						2.1406	54.31
						2.1572	51.47
						2.1572	42.3
						2.1572	44.17
						2.1739	70.89
						2.1739	66.94
						2.1739	57.72
						2.1906	77.92
						2.1906	74.9
						2.1906	71.91
						2.2072	80.97
						2.2072	78.05
						2.2072	75.51
						2.2239	82.32
						2.2239	80.19
						2.2239	77.92
						2.2406	77.26
						2.2406	78.14
						2.2406	79.87
						2.2572	53.39
						2.2572	44.62
						2.2572	46.96
						2.2739	49.32
						2.2739	42.65
						2.2739	43.43
						2.2906	68.23
						2.2906	58.2
						2.2906	48.83
						2.3072	77.66
						2.3072	72.46
						2.3072	68.21
						2.3239	81.43
						2.3239	77.94
						2.3239	74.68
						2.3406	82.57
						2.3406	80.46
						2.3406	78.05
						2.3572	83.48
						2.3572	81.82
						2.3572	79.52
						2.3739	62.64
						2.3739	59.38
						2.3739	67.15
						2.3906	51.59
						2.3906	41.21
						2.3906	42.73
						2.4072	54.04
						2.4072	49.12
						2.4072	39.78
						2.4239	65.82
						2.4239	70.48
						2.4239	64.4
						2.4406	77.85
						2.4406	78.3
						2.4406	74.91
						2.4572	80.19
						2.4572	79.8
						2.4572	77.63
						2.4739	81.18
						2.4739	80.85
						2.4739	78.67
						2.4906	52.17
						2.4906	42.19
						2.4906	45.41
						2.5072	48.25
						2.5072	39.3
						2.5072	39.19
						2.5239	63.91
						2.5239	59.37
						2.5239	49.71
						2.5406	75.98
						2.5406	75.48
						2.5406	71.31
						2.5572	76.69
						2.5572	79.11
						2.5572	76.55
						2.5739	73.84
						2.5739	80.71
						2.5739	78.28
						2.5906	77.59
						2.5906	81.32
						2.5906	79.73
						2.6072	65.49
						2.6072	70.78
						2.6072	75.53
						2.6239	47.15
						2.6239	35.34
						2.6239	38.93
						2.6406	50.92
						2.6406	47.91
						2.6406	37.75
						2.6572	74.38
						2.6572	73.85
						2.6572	67.38
						2.6739	78.76
						2.6739	78.03
						2.6739	76.28
						2.6906	79.12
						2.6906	79.39
						2.6906	77.9
						2.7072	76.7
						2.7072	79.96
						2.7072	78.64
						2.7239	47.78
						2.7239	40.95
						2.7239	47.02
						2.7406	42.76
						2.7406	31.81
						2.7406	33.7
						2.7572	43.35
						2.7572	47.78
						2.7572	35.82
						2.7739	72.4
						2.7739	73.22
						2.7739	66.48
						2.7906	77.94
						2.7906	76.93
						2.7906	75.32
						2.8072	79.13
						2.8072	77.92
						2.8072	76.97
						2.8239	59.41
						2.8239	58.77
						2.8239	67.19
						2.8406	44.25
						2.8406	31.21
						2.8406	36.58
						2.8572	47.54
						2.8572	38.87
						2.8572	33.27
						2.8739	72.22
						2.8739	69.56
						2.8739	63.88
						2.8906	75.23
						2.8906	75.81
						2.8906	72.84
						2.9072	77.43
						2.9072	77.15
						2.9072	76.26
						2.9239	79.19
						2.9239	78.18
						2.9239	76.92
						2.9406	80.07
						2.9406	79.16
						2.9406	78.38
						2.9572	48.21
						2.9572	41.27
						2.9572	46.41
						2.9739	41.24
						2.9739	29.11
						2.9739	31.53
						2.9906	53.46
						2.9906	51.16
						2.9906	40.73
						3.0072	74.61
						3.0072	72.57
						3.0072	68.57
						3.0239	78.04
						3.0239	75.82
						3.0239	74.19
						3.0406	78.3
						3.0406	77.05
						3.0406	75.54
						3.0572	78.83
						3.0572	78.68
						3.0572	76.75
						3.0739	50.17
						3.0739	45.93
						3.0739	53.28
						3.0906	42.64
						3.0906	29.67
						3.0906	31.37
						3.1072	53.15
						3.1072	47.64
						3.1072	34.91
						3.1239	61.45
						3.1239	71.42
						3.1239	64.97
						3.1406	69.7
						3.1406	76.07
						3.1406	71.79
						3.1572	67.79
						3.1572	76.64
						3.1572	74.31
						3.1739	71.3
						3.1739	77.86
						3.1739	75.94
						3.1906	41.12
						3.1906	37.94
						3.1906	41.43
						3.2072	40.67
						3.2072	27.36
						3.2072	29.26
						3.2239	48.18
						3.2239	56.14
						3.2239	42.08
						3.2406	53.59
						3.2406	72.96
						3.2406	67.92
						3.2572	62.64
						3.2572	75.67
						3.2572	73.35
						3.2739	67.57
						3.2739	76.66
						3.2739	75.05
						3.2906	71.17
						3.2906	77.28
						3.2906	75.81
						3.3072	62.53
						3.3072	69.85
						3.3072	75.43
						3.3239	35.89
						3.3239	31.01
						3.3239	33.62
						3.3406	31.75
						3.3406	28.27
						3.3406	27.47
						3.3572	57.42
						3.3572	61.94
						3.3572	49.84
						3.3739	63.28
						3.3739	73.21
						3.3739	68.12
						3.3906	64.63
						3.3906	75.04
						3.3906	73.06
						3.4072	69.18
						3.4072	75.98
						3.4072	74.36
						3.4239	43.57
						3.4239	49.91
						3.4239	57.4
						3.4406	18.39
						3.4406	27.04
						3.4406	30.51
						3.4572	15.21
						3.4572	26.97
						3.4572	24.53
						3.4739	39.7
						3.4739	51.19
						3.4739	38.55
						3.4906	59.88
						3.4906	69.45
						3.4906	64.46
						3.5072	66.86
						3.5072	73.67
						3.5072	71.51
						3.5239	65.49
						3.5239	71.36
						3.5239	72.49
						3.5406	39.72
						3.5406	31.13
						3.5406	30.1
						3.5572	11.77
						3.5572	29.41
						3.5572	27.62
						3.5739	20.94
						3.5739	51.14
						3.5739	28.74
						3.5906	34.23
						3.5906	68.88
						3.5906	62.16
						3.6072	41.65
						3.6072	72.54
						3.6072	69.05
						3.6239	45.37
						3.6239	73.76
						3.6239	70.2
						3.6406	23.29
						3.6406	49.03
						3.6406	56.55
						3.6572	3.67
						3.6572	26.32
						3.6572	23.33
						3.6739	2.51
						3.6739	24.94
						3.6739	23.09
						3.6906	1.64
						3.6906	50.87
						3.6906	40.21
						3.7072	18.85
						3.7072	66.55
						3.7072	64.29
						3.7239	22.88
						3.7239	68.96
						3.7239	69.42
						3.7406	23.27
						3.7406	57.03
						3.7406	63.52
						3.7572	5.03
						3.7572	23.57
						3.7572	22.03
						3.7739	2.08
						3.7739	21.01
						3.7739	18
						3.7906	1.02
						3.7906	18.91
						3.7906	13.65
						3.8072	9.15
						3.8072	54.62
						3.8072	49.61
						3.8239	18.81
						3.8239	66.7
						3.8239	62.9
						3.8406	19.78
						3.8406	68.51
						3.8406	66.92
						3.8572	1.75
						3.8572	25.77
						3.8572	24.46
						3.8739	0.83
						3.8739	22.13
						3.8739	14.38
						3.8906	0.54
						3.8906	25.72
						3.8906	15.69
						3.9072	0.39
						3.9072	43.72
						3.9072	35.92
						3.9239	0.28
						3.9239	63.9
						3.9239	59.59
						3.9406	0.31
						3.9406	67.82
						3.9406	63.98
						3.9572	0.17
						3.9572	64.31
						3.9572	65.92
						3.9739	0.07
						3.9739	22.99
						3.9739	17
						3.9906	12.99
						3.9906	20.98
						3.9906	16.67
						4.0072	12.09
						4.0072	21.17
						4.0072	9.78
						4.0239	16.13
						4.0239	30.81
						4.0239	6.24
						4.0406	15.1
						4.0406	58.77
						4.0406	33.26
						4.0572	14.78
						4.0572	64.97
						4.0572	55.34
						4.0739	39.18
						4.0739	67.26
						4.0739	63.95
						4.0906	39.89
						4.0906	55.86
						4.0906	53.82
						4.1072	19.03
						4.1072	11.95
						4.1072	13.17
						4.1239	24.7
						4.1239	29.17
						4.1239	7.54
						4.1406	56.37
						4.1406	53.42
						4.1406	46.7
						4.1572	63.04
						4.1572	55.87
						4.1572	58.48
						4.1739	71.3
						4.1739	63.52
						4.1739	63.01
						4.1906	64.6
						4.1906	65.14
						4.1906	64.14
						4.2072	8.82
						4.2072	21.99
						4.2072	33.23
						4.2239	2.65
						4.2239	6.54
						4.2239	9.65
						4.2406	1.55
						4.2406	32.79
						4.2406	2.56
						4.2572	1.01
						4.2572	55.51
						4.2572	48.31
						4.2739	0.69
						4.2739	58.87
						4.2739	60.33
						4.2906	0.45
						4.2906	62.96
						4.2906	65.29
						4.3072	0.3
						4.3072	64.14
						4.3072	67.49
						4.3239	0.16
						4.3239	66.42
						4.3239	58.06
						4.3406	0.1
						4.3406	9.82
						4.3406	21.57
						4.3572	0.02
						4.3572	4.82
						4.3572	8.06
						4.3739	0
						4.3739	15.89
						4.3739	27.56
						4.3906	0
						4.3906	33.86
						4.3906	51.41
						4.4072	0
						4.4072	43.47
						4.4072	54.49
						4.4239	0
						4.4239	40.02
						4.4239	63.65
						4.4406	0
						4.4406	38.94
						4.4406	66.62
						4.4572	0
						4.4572	3.49
						4.4572	23.24
						4.5056	0
						4.5056	1.53
						4.5056	7.61
						4.5136	0
						4.5136	31.24
						4.5136	57.72
						4.5303	0
						4.5303	28.4
						4.5303	59.18
						4.5469	0
						4.5469	30.32
						4.5469	53.32
						4.5636	0
						4.5636	28.97
						4.5636	65.38
						4.5803	0
						4.5803	16.07
						4.5803	43.92
						4.5969	0
						4.5969	1.72
						4.5969	9.46
						4.6136	0
						4.6136	0.88
						4.6136	4.4
						4.6303	0
						4.6303	0.56
						4.6303	40.39
						4.6469	0
						4.6469	0.38
						4.6469	51.9
						4.6636	0
						4.6636	13.02
						4.6636	44.78
						4.6803	0
						4.6803	5.16
						4.6803	54.1
						4.6969	0
						4.6969	6.58
						4.6969	47.47
						4.7136	0
						4.7136	18.17
						4.7136	57.96
						4.7303	0
						4.7303	1.79
						4.7303	29.23
						4.7469	0
						4.7469	0.44
						4.7469	4.31
						4.7636	0
						4.7636	0.18
						4.7636	3.34
						4.7803	0
						4.7803	0.07
						4.7803	41.79
						4.7969	0
						4.7969	0
						4.7969	39.77
						4.8136	0
						4.8136	0
						4.8136	53.25
						4.8303	0
						4.8303	0
						4.8303	57.72
						4.8469	0
						4.8469	0
						4.8469	5.91
						4.8636	0
						4.8636	0
						4.8636	2.12
						4.8803	0
						4.8803	0
						4.8803	1.32
						4.8969	0
						4.8969	0
						4.8969	0.91
						4.9136	0
						4.9136	0.08
						4.9136	8.15
						4.9303	0
						4.9303	4.29
						4.9303	26.07
						4.9469	0
						4.9469	0.97
						4.9469	1.26
						4.9636	0
						4.9636	1.2
						4.9636	0.54
						4.9803	0
						4.9803	2.62
						4.9803	0.36
						4.9969	0
						4.9969	1.45
						4.9969	0.21
						5.0136	0
						5.0136	27.01
						5.0136	0.14
						5.0303	0
						5.0303	38.11
						5.0303	21.63
						5.0469	0
						5.0469	32.4
						5.0469	19.1
						5.0636	0
						5.0636	7.95
						5.0636	1.15
						5.0803	0
						5.0803	2.25
						5.0803	0.43
						5.0969	0
						5.0969	0.55
						5.0969	0.18
						5.1136	0
						5.1136	0.26
						5.1136	0.08
						5.1303	1.39
						5.1303	45.21
						5.1303	9.83
						5.1469	4.42
						5.1469	48.12
						5.1469	24.51
						5.1636	5.39
						5.1636	2.19
						5.1636	4.48
						5.1803	6.44
						5.1803	1.11
						5.1803	3.25
						5.1969	7.99
						5.1969	0.36
						5.1969	4.07
						5.2136	9.24
						5.2136	19.31
						5.2136	0.7
						5.2303	12.46
						5.2303	49.85
						5.2303	5.46
						5.2469	13.46
						5.2469	46.41
						5.2469	49.74
						5.2636	11.59
						5.2636	6.79
						5.2636	25.84
						5.2803	0.86
						5.2803	1.16
						5.2803	5.23
						5.2969	0.03
						5.2969	0.5
						5.2969	2.14
						5.3136	0
						5.3136	0.22
						5.3136	0.75
						5.3303	0
						5.3303	0.02
						5.3303	27.88
						5.3469	0
						5.3469	0
						5.3469	49.77
						5.3636	0
						5.3636	0
						5.3636	58.32
						5.3803	0
						5.3803	0
						5.3803	4.39
						5.3969	0
						5.3969	0
						5.3969	1.84
						5.4136	0
						5.4136	0
						5.4136	1.53
						5.4303	0
						5.4303	0
						5.4303	21.05
						5.4469	0
						5.4469	7.42
						5.4469	47.17
						5.4636	0
						5.4636	33.21
						5.4636	59.3
						5.4803	0
						5.4803	2.13
						5.4803	12.22
						5.4969	0
						5.4969	0.31
						5.4969	3.53
						5.5136	0
						5.5136	0.29
						5.5136	2.38
						5.5303	0
						5.5303	3.69
						5.5303	10.17
						5.5469	0
						5.5469	36.8
						5.5469	46.06
						5.5636	0
						5.5636	47.3
						5.5636	59.23
						5.5803	0
						5.5803	5.29
						5.5803	12.57
						5.5969	0
						5.5969	1.05
						5.5969	3.64
						5.6136	0
						5.6136	0.32
						5.6136	2.61
						5.6303	0
						5.6303	10.76
						5.6303	1.75
						5.6469	0
						5.6469	41.15
						5.6469	38.42
						5.6636	0
						5.6636	47.47
						5.6636	53.37
						5.6803	0
						5.6803	58.08
						5.6803	57.74
						5.6969	0
						5.6969	4.89
						5.6969	9.39
						5.7136	0
						5.7136	1.24
						5.7136	2.28
						5.7303	0
						5.7303	0.6
						5.7303	1.65
						5.7469	0
						5.7469	1.86
						5.7469	4.32
						5.7636	0
						5.7636	31.27
						5.7636	39.28
						5.7803	0
						5.7803	43.42
						5.7803	54.03
						5.7969	0
						5.7969	29.23
						5.7969	41.6
						5.8136	0
						5.8136	1.54
						5.8136	2.77
						5.8303	0
						5.8303	0.7
						5.8303	3.04
						5.8469	0
						5.8469	0.5
						5.8469	2.64
						5.8636	0
						5.8636	30.86
						5.8636	36.3
						5.8803	0
						5.8803	46.08
						5.8803	50.31
						5.8969	0
						5.8969	36.59
						5.8969	45.3
						5.9136	0
						5.9136	1.74
						5.9136	3.45
						5.9303	0
						5.9303	0.93
						5.9303	2.29
						5.9469	0
						5.9469	0.34
						5.9469	1.99
						5.9636	0
						5.9636	22.66
						5.9636	36.08
						5.9803	0
						5.9803	46.46
						5.9803	50.42
						5.9969	0
						5.9969	56.21
						5.9969	53.03
						6.0136	0
						6.0136	10.36
						6.0136	24.56
						6.0303	0
						6.0303	1.52
						6.0303	2.73
						6.0469	0
						6.0469	0.72
						6.0469	1.68
						6.0636	0
						6.0636	1.27
						6.0636	3.03
						6.0803	0
						6.0803	31.84
						6.0803	41.11
						6.0969	0
						6.0969	49.44
						6.0969	50.86
						6.1136	0
						6.1136	36.17
						6.1136	46.64
						6.1303	0
						6.1303	1.82
						6.1303	3.42
						6.1469	0
						6.1469	0.76
						6.1469	2.1
						6.1636	0
						6.1636	0.49
						6.1636	1.48
						6.1803	0
						6.1803	17.84
						6.1803	34.03
						6.1969	0
						6.1969	47.34
						6.1969	47.86
						6.2136	0
						6.2136	43.04
						6.2136	48.9
						6.2303	0
						6.2303	1.77
						6.2303	5.68
						6.2469	0
						6.2469	0.69
						6.2469	1.43
						6.2636	0
						6.2636	0.31
						6.2636	1.43
						6.2803	0
						6.2803	2.88
						6.2803	31.18
						6.2969	0
						6.2969	39.56
						6.2969	47.04
						6.3136	0
						6.3136	48.37
						6.3136	49.67
						6.3303	0
						6.3303	16.87
						6.3303	32.12
						6.3469	0
						6.3469	1.45
						6.3469	8.96
						6.3636	0
						6.3636	0.61
						6.3636	9.84
						6.3803	0
						6.3803	0.3
						6.3803	9.78
						6.3969	0
						6.3969	15.55
						6.3969	4.11
						6.4136	0
						6.4136	43.7
						6.4136	38.36
						6.4303	0
						6.4303	48.38
						6.4303	51.9
						6.4469	0
						6.4469	2.01
						6.4469	3.95
						6.4636	0
						6.4636	0.73
						6.4636	1.45
						6.4803	0
						6.4803	0.38
						6.4803	1.62
						6.4969	0
						6.4969	0.28
						6.4969	20.75
						6.5136	0
						6.5136	33.76
						6.5136	42.45
						6.5303	0
						6.5303	46.21
						6.5303	46.86
						6.5469	0
						6.5469	17.68
						6.5469	33.17
						6.5636	0
						6.5636	1.38
						6.5636	8.32
						6.5803	0
						6.5803	0.62
						6.5803	3.95
						6.5969	0
						6.5969	0.32
						6.5969	0.93
						6.6136	0
						6.6136	12.06
						6.6136	24.22
						6.6303	0
						6.6303	40.75
						6.6303	46.55
						6.6469	0
						6.6469	45.84
						6.6469	53.11
						6.6636	0
						6.6636	6.83
						6.6636	22.88
						6.6803	0
						6.6803	1.79
						6.6803	12.76
						6.6969	0
						6.6969	0.83
						6.6969	11.89
						6.7136	0
						6.7136	0.41
						6.7136	9.54
						6.7303	0
						6.7303	6.02
						6.7303	13.66
						6.7469	0
						6.7469	39.07
						6.7469	44.09
						6.7636	0
						6.7636	24.23
						6.7636	37.73
						6.7803	0
						6.7803	1.24
						6.7803	5.01
						6.7969	0
						6.7969	0.45
						6.7969	1.29
						6.8136	0
						6.8136	0.18
						6.8136	1.1
						6.8303	0
						6.8303	0.16
						6.8303	36.99
						6.8469	0
						6.8469	25.74
						6.8469	44.36
						6.8636	0
						6.8636	42.66
						6.8636	47.77
						6.8803	0
						6.8803	50.85
						6.8803	52.94
						6.8969	0
						6.8969	4.83
						6.8969	17.67
						6.9136	0
						6.9136	1.1
						6.9136	4.48
						6.9303	0
						6.9303	0.48
						6.9303	1.4
						6.9469	0
						6.9469	0.19
						6.9469	0.76
						6.9636	0
						6.9636	0.05
						6.9636	34.34
						6.9803	0
						6.9803	30.41
						6.9803	50.96
						6.9969	0
						6.9969	44.33
						6.9969	56.76
						7.0136	0
						7.0136	1.96
						7.0136	6.58
						7.0303	0
						7.0303	0.52
						7.0303	1.66
						7.0469	0
						7.0469	0.17
						7.0469	0.82
						7.0636	0
						7.0636	0
						7.0636	16.59
						7.0803	0
						7.0803	7.85
						7.0803	46.11
						7.0969	0
						7.0969	40.48
						7.0969	54.52
						7.1136	0
						7.1136	4.12
						7.1136	11.94
						7.1303	0
						7.1303	0.67
						7.1303	1.84
						7.1469	0
						7.1469	0.2
						7.1469	0.89
						7.1636	0
						7.1636	0
						7.1636	6.7
						7.1803	0
						7.1803	1.27
						7.1803	37.1
						7.1969	0
						7.1969	35.37
						7.1969	49.6
						7.2136	0
						7.2136	5.05
						7.2136	22.08
						7.2303	0
						7.2303	0.61
						7.2303	1.93
						7.2469	0
						7.2469	0.1
						7.2469	0.89
						7.2636	0
						7.2636	0
						7.2636	0.84
						7.2803	0
						7.2803	0
						7.2803	30.66
						7.2969	0
						7.2969	2.77
						7.2969	49.87
						7.3136	0
						7.3136	38.82
						7.3136	53.57
						7.3303	0
						7.3303	2.77
						7.3303	8.85
						7.3469	0
						7.3469	0.4
						7.3469	1.72
						7.3636	0
						7.3636	0.04
						7.3636	0.81
						7.3803	0
						7.3803	0
						7.3803	6.83
						7.3969	0
						7.3969	0
						7.3969	37.2
						7.4136	0
						7.4136	20.37
						7.4136	51.91
						7.4303	0
						7.4303	14.16
						7.4303	33.73
						7.4469	0
						7.4469	0.45
						7.4469	2.16
						7.4636	0
						7.4636	0
						7.4636	0.93
						7.4803	0
						7.4803	0
						7.4803	0.66
						7.4969	0
						7.4969	0
						7.4969	30.58
						7.5136	0
						7.5136	8.73
						7.5136	48.81
						7.5303	0
						7.5303	0
						7.5303	33.71
						7.5469	0
						7.5469	0
						7.5469	1.89
						7.5636	0
						7.5636	0
						7.5636	0.77
						7.5803	0
						7.5803	0
						7.5803	0.4
						7.5969	0
						7.5969	0
						7.5969	25.41
						7.6136	0
						7.6136	0
						7.6136	43.87
						7.6303	0
						7.6303	23.09
						7.6303	51.85
						7.6469	0
						7.6469	8.69
						7.6469	34.49
						7.6636	0
						7.6636	0.32
						7.6636	2.26
						7.6803	0
						7.6803	0
						7.6803	0.96
						7.6969	0
						7.6969	0
						7.6969	5.28
						7.7136	0
						7.7136	0
						7.7136	33.7
						7.7303	0
						7.7303	16.8
						7.7303	51.32
						7.7469	0
						7.7469	40.43
						7.7469	53.62
						7.7636	0
						7.7636	0.76
						7.7636	3.01
						7.7803	0
						7.7803	0.01
						7.7803	1.1
						7.7969	0
						7.7969	0
						7.7969	0.54
						7.8136	0
						7.8136	0
						7.8136	23.01
						7.8303	0
						7.8303	0
						7.8303	43.63
						7.8469	0
						7.8469	1.03
						7.8469	53.48
						7.8636	0
						7.8636	13.9
						7.8636	57.28
						7.8803	0
						7.8803	41.72
						7.8803	60.28
						7.8969	0
						7.8969	1.06
						7.8969	3.94
						7.9136	0
						7.9136	0.04
						7.9136	1.5
						7.9303	0
						7.9303	0
						7.9303	1.79
						7.9469	0
						7.9469	0
						7.9469	30.44
						7.9636	0
						7.9636	1.04
						7.9636	45.64
						7.9803	0
						7.9803	32.28
						7.9803	54.33
						7.9969	0
						7.9969	34.4
						7.9969	53.32
						8.0136	0
						8.0136	0.8
						8.0136	2.88
						8.0303	0
						8.0303	0.08
						8.0303	1.18
						8.0469	0
						8.0469	0
						8.0469	2.49
						8.0636	0
						8.0636	0
						8.0636	26.64
						8.0803	0
						8.0803	3.28
						8.0803	48.09
						8.0969	0
						8.0969	6.1
						8.0969	55.64
						8.1136	0
						8.1136	0.01
						8.1136	4.32
						8.1303	0
						8.1303	0
						8.1303	1.33
						8.1469	0
						8.1469	0
						8.1469	0.64
						8.1636	0
						8.1636	0
						8.1636	18.16
						8.1803	0
						8.1803	0
						8.1803	40.28
						8.1969	0
						8.1969	0
						8.1969	51.44
						8.2136	0
						8.2136	0
						8.2136	5.65
						8.2303	0
						8.2303	0
						8.2303	1.3
						8.2469	0
						8.2469	0
						8.2469	0.59
						8.2636	0
						8.2636	0
						8.2636	13.64
						8.2803	0
						8.2803	0
						8.2803	38.11
						8.2969	0
						8.2969	0
						8.2969	52.79
						8.3136	0
						8.3136	0
						8.3136	56.96
						8.3303	0
						8.3303	0
						8.3303	4.23
						8.3469	0
						8.3469	0
						8.3469	1.33
						8.3636	0
						8.3636	0
						8.3636	0.62
						8.3803	0
						8.3803	0
						8.3803	18.89
						8.3969	0
						8.3969	0
						8.3969	41
						8.4136	0
						8.4136	0
						8.4136	51.57
						8.4303	0
						8.4303	0
						8.4303	10.21
						8.4469	0
						8.4469	0
						8.4469	1.52
						8.4636	0
						8.4636	0
						8.4636	0.65
						8.4803	0
						8.4803	0
						8.4803	8.51
						8.4969	0
						8.4969	0
						8.4969	35.38
						8.5136	0
						8.5136	0
						8.5136	46.83
						8.5303	0
						8.5303	0
						8.5303	43.53
						8.5469	0
						8.5469	0
						8.5469	2.13
						8.5636	0
						8.5636	0
						8.5636	0.8
						8.5803	0
						8.5803	0
						8.5803	0.41
						8.7142	0
						8.7142	0
						8.7142	19.17
						8.7169	0
						8.7169	0
						8.7169	19.84
						8.7208	0
						8.7208	0
						8.7208	5
						8.7383	0
						8.7383	0
						8.7383	60.54
						8.7561	0
						8.7561	14.69
						8.7561	67.32
						8.7728	0
						8.7728	35.37
						8.7728	71.93
						8.7894	0
						8.7894	49.82
						8.7894	74.37
						8.8061	0
						8.8061	55.53
						8.8061	75.99
						8.8228	0
						8.8228	59.39
						8.8228	76.92
						8.8394	0
						8.8394	47.27
						8.8394	77.74
						8.8561	0
						8.8561	59.87
						8.8561	78.12
						8.8728	0
						8.8728	61.89
						8.8728	78.7
						8.8894	0
						8.8894	46.95
						8.8894	79.1
						8.9061	0
						8.9061	60.99
						8.9061	79.46
						8.9228	0
						8.9228	44.3
						8.9228	75.1
						8.9394	0
						8.9394	52.38
						8.9394	67.35
						8.9561	0
						8.9561	57.88
						8.9561	56.61
						8.9728	0
						8.9728	64
						8.9728	53.57
						8.9894	48.07
						8.9894	54.35
						8.9894	74.56
						9.0061	53.02
						9.0061	53.43
						9.0061	79.65
						9.0228	54.38
						9.0228	66.84
						9.0228	80.37
						9.0394	54.99
						9.0394	67.25
						9.0394	80.63
						9.0561	55.33
						9.0561	67.49
						9.0561	81.59
						9.0728	55.87
						9.0728	74.41
						9.0728	81.76
						9.0894	56.23
						9.0894	73.5
						9.0894	81.65
						9.1061	56.54
						9.1061	75.56
						9.1061	82.05
						9.1228	56.66
						9.1228	75.56
						9.1228	82.03
						9.1394	57.24
						9.1394	69.63
						9.1394	81.99
						9.1561	57.58
						9.1561	74.34
						9.1561	82.46
						9.1728	57.96
						9.1728	72.18
						9.1728	82.36
						9.1894	58.39
						9.1894	77.88
						9.1894	82.58
						9.2061	58.83
						9.2061	78.2
						9.2061	82.98
						9.2228	60.69
						9.2228	78.56
						9.2228	82.81
						9.2394	61.03
						9.2394	66.89
						9.2394	82.96
						9.2561	61.45
						9.2561	78.06
						9.2561	82.44
						9.2728	61.89
						9.2728	78.24
						9.2728	83.2
						9.2894	62.18
						9.2894	73.22
						9.2894	82.74
						9.3061	62.75
						9.3061	70.61
						9.3061	83
						9.3228	64.31
						9.3228	78.43
						9.3228	82.74
						9.3394	64.67
						9.3394	76.51
						9.3394	83.28
						9.3561	65.2
						9.3561	78.86
						9.3561	83.86
						9.3728	65.5
						9.3728	80.22
						9.3728	84.09
						9.3894	65.75
						9.3894	81.9
						9.3894	82.19
						9.4061	66.08
						9.4061	76.46
						9.4061	82.46
						9.4228	66.68
						9.4228	71.6
						9.4228	83.04
						9.4394	67.1
						9.4394	77.68
						9.4394	82.69
						9.4561	67.32
						9.4561	81.88
						9.4561	82.64
						9.4728	67.87
						9.4728	82.45
						9.4728	82.46
						9.4894	68.27
						9.4894	83.11
						9.4894	82.76
						9.5061	68.77
						9.5061	83.08
						9.5061	82.96
						9.5228	69.04
						9.5228	78.37
						9.5228	83.47
						9.5394	67.99
						9.5394	80.53
						9.5394	82.64
						9.5561	67.63
						9.5561	4.87
						9.5561	7.01
						9.5728	65.6
						9.5728	2.48
						9.5728	3.32
						9.5894	63.84
						9.5894	1.66
						9.5894	2.26
						9.6061	62.2
						9.6061	1.2
						9.6061	13.57
						9.6228	62.24
						9.6228	16.61
						9.6228	40.57
						9.6394	62.96
						9.6394	41.14
						9.6394	52.71
						9.6561	61.52
						9.6561	37.1
						9.6561	48.39
						9.6728	61.08
						9.6728	2.02
						9.6728	3.26
						9.6894	59.57
						9.6894	1.04
						9.6894	1.72
						9.7061	58.1
						9.7061	0.68
						9.7061	1.15
						9.7228	56.66
						9.7228	0.44
						9.7228	1.31
						9.7394	56.87
						9.7394	0.32
						9.7394	29.36
						9.7561	57.91
						9.7561	0.25
						9.7561	47.54
						9.7728	57
						9.7728	12.33
						9.7728	46.35
						9.7894	57.15
						9.7894	0.37
						9.7894	2.6
						9.8061	55.68
						9.8061	0.16
						9.8061	1.24
						9.8228	54.66
						9.8228	0.07
						9.8228	0.77
						9.8394	53.73
						9.8394	0
						9.8394	0.53
						9.8561	54.85
						9.8561	0
						9.8561	14.15
						9.8728	56.02
						9.8728	11.48
						9.8728	42.17
						9.8894	55.58
						9.8894	8.64
						9.8894	29.29
						9.9061	55.53
						9.9061	0.47
						9.9061	1.68
						9.9228	54.66
						9.9228	0.09
						9.9228	0.76
						9.9394	53.59
						9.9394	0
						9.9394	0.45
						9.9561	52.77
						9.9561	0
						9.9561	0.27
						9.9728	54.14
						9.9728	0
						9.9728	0.13
						9.9894	55.71
						9.9894	0
						9.9894	22.97
						10.0061	55.12
						10.0061	1.67
						10.0061	9.15
						10.0228	54.93
						10.0228	0.01
						10.0228	0.88
						10.0394	54.4
						10.0394	0
						10.0394	0.3
						10.0561	53.44
						10.0561	0
						10.0561	0.16
						10.0728	53.32
						10.0728	0
						10.0728	0.04
						10.0894	54.75
						10.0894	0
						10.0894	1.98
						10.1061	55.46
						10.1061	0
						10.1061	33.13
						10.1228	55.78
						10.1228	0
						10.1228	3.07
						10.1394	55.8
						10.1394	0
						10.1394	0.61
						10.1561	55.32
						10.1561	0
						10.1561	0.21
						10.1728	53.82
						10.1728	0
						10.1728	0.02
						10.1894	54.69
						10.1894	0
						10.1894	0
						10.2061	55.63
						10.2061	0
						10.2061	2.18
						10.2228	56.51
						10.2228	0
						10.2228	32.46
						10.2397	57.25
						10.2397	0
						10.2397	35.67
						10.2561	58.57
						10.2561	0
						10.2561	1.28
						10.2728	58.06
						10.2728	0
						10.2728	0.42
						10.2894	57.19
						10.2894	0
						10.2894	0.14
						10.3061	56.84
						10.3061	0
						10.3061	0
						10.3228	57.98
						10.3228	0
						10.3228	0
						10.3394	59.25
						10.3394	0
						10.3394	28.13
						10.3561	59.19
						10.3561	0
						10.3561	45.95
						10.3728	60.57
						10.3728	0
						10.3728	2.01
						10.3894	59.64
						10.3894	0
						10.3894	0.54
						10.4061	59.19
						10.4061	0
						10.4061	0.17
						10.4228	58.85
						10.4228	0
						10.4228	0
						10.4394	60.01
						10.4394	0
						10.4394	0
						10.4561	61.63
						10.4561	0
						10.4561	3.98
						10.4728	61.79
						10.4728	0
						10.4728	34.1
						10.4894	62.3
						10.4894	0
						10.4894	0.75
						10.5061	62.02
						10.5061	0
						10.5061	0.08
						10.5228	61.77
						10.5228	0
						10.5228	0
						10.5394	61.57
						10.5394	0
						10.5394	0
						10.5561	62.83
						10.5561	0
						10.5561	0
						10.5728	64.23
						10.5728	0
						10.5728	0
						10.5894	64.7
						10.5894	0
						10.5894	6.37
						10.6061	65.51
						10.6061	0
						10.6061	0
						10.6228	65.1
						10.6228	0
						10.6228	0
						10.6394	65.03
						10.6394	0
						10.6394	0
						10.6561	65.05
						10.6561	0
						10.6561	0
						10.6728	66.24
						10.6728	0
						10.6728	0
						10.6894	67.57
						10.6894	0
						10.6894	22.55
						10.7061	68.3
						10.7061	0
						10.7061	11.53
						10.7228	68.89
						10.7228	0
						10.7228	0.53
						10.7394	68.67
						10.7394	0
						10.7394	0.03
						10.7561	68.53
						10.7561	0
						10.7561	0
						10.7728	68.45
						10.7728	0
						10.7728	0
						10.7894	69.99
						10.7894	0
						10.7894	0
						10.8061	71.67
						10.8061	0
						10.8061	21.64
						10.8228	72.37
						10.8228	0
						10.8228	1.79
						10.8394	72.61
						10.8394	0
						10.8394	0.06
						10.8561	72.87
						10.8561	0
						10.8561	0
						10.8728	72.38
						10.8728	0
						10.8728	0
						10.8894	72.2
						10.8894	0
						10.8894	0
						10.9061	73.55
						10.9061	0
						10.9061	3.57
						10.9228	74.78
						10.9228	0.01
						10.9228	3.55
						10.9394	75.27
						10.9394	0.06
						10.9394	1.98
						10.9561	75.91
						10.9561	0.06
						10.9561	0.06
						10.9728	75.98
						10.9728	0.08
						10.9728	0
						10.9894	75.17
						10.9894	0.14
						10.9894	0
						11.0061	75.39
						11.0061	0.16
						11.0061	0
						11.0228	76.49
						11.0228	0.17
						11.0228	20.93
						11.0394	77.43
						11.0394	0.2
						11.0394	40.22
						11.0561	77.9
						11.0561	0.25
						11.0561	3.48
						11.0728	78.22
						11.0728	0.24
						11.0728	0.62
						11.0894	77.86
						11.0894	0.27
						11.0894	0.16
						11.1061	77.27
						11.1061	0.3
						11.1061	0
						11.1228	77.11
						11.1228	0.3
						11.1228	0
						11.1394	77.8
						11.1394	0.33
[truncated: 370 more rows]

## Sheet: Strain 2
Escherichia coli BW25113
Biomass		Acetate		Glucose		DOT
Time [h]	Values [g/L]	Time [h]	Values [g/L]	Time [h]	Values [g/L]	Time [h]	Values [%]
0.0792	2.46894	0.5603	0.455449	0.5603	3.44738	0.0069	90.32
0.0792	2.37197	0.5603	0.451668	0.5603	3.50826	0.0069	93.05
0.1156	2.29924	0.8592	0.468684	0.8592	2.09912	0.0069	92.57
0.1156	2.4447	0.8592	0.463957	0.8592	2.40996	0.0097	90.05
0.1522	2.42045	1.1567	0.476246	1.1567	0.113627	0.0097	92.81
0.1522	2.4447	1.1567	0.483809	1.1567	0.122693	0.0097	92.71
0.5603	3.01212	1.4631	0.512169	1.4631	4.36436	0.0125	90.46
0.5603	2.96364	1.4631	0.500825	1.4631	4.21153	0.0125	93.1
0.8592	2.81818	1.7622	0.507442	1.7622	3.17669	0.0125	92.6
0.8592	2.67273	1.7622	0.513114	1.7622	3.07826	0.0153	90
1.1567	3.25455	2.0658	0.473685	2.0658	0.0142578	0.0153	92.83
1.1567	3.15758	2.0658	0.49706	2.0658	0.0169363	0.0153	92.79
1.4631	4.34545	2.4069	0.501896	2.4069	0.0169363	0.0181	90.34
1.4631	4.05455	2.4069	0.479327	2.4069	0.0142578	0.0181	92.96
1.7622	3.90909	2.7531	0.402755	2.7531	0.0142578	0.0181	92.56
1.7622	3.93333	2.7531	0.388246	2.7531	0.0155971	0.0219	90.64
2.0658	4.3	3.1097	0.0771196	3.1097	0.000865373	0.0219	94.95
2.0658	4.22727	3.1097	0.0497146	3.1097	0.0102401	0.0219	93.57
2.4069	5.31818	3.4567	0.274596	3.4567	0.0102401	0.0394	90.07
2.4069	5.35455	3.4567	0.262506	3.4567	0.0155971	0.0394	92.58
2.7531	4.73636	3.7817	0.0586913	3.7817	0.0189691	0.0394	92.56
2.7531	5.02727	3.7817	0.059745	3.7817	0.0164826	0.0572	90.09
3.1097	5.06364	4.1256	0.0312955	4.1256	0.0189691	0.0572	92.88
3.1097	5.02727	4.1256	0.0218123	4.1256	0.0139961	0.0572	92.66
3.4567	5.86364	4.4836	0.165114	4.4836	0.0189691	0.0739	90.31
3.4567	5.79091	4.4836	0.150362	4.4836	0.0214555	0.0739	92.9
3.7817	6.11591	4.8667	0.0860872	4.8667	0.0202123	0.0739	92.15
3.7817	6.26136	4.8667	0.0818724	4.8667	0.0202123	0.0906	90.12
4.1256	6.66136	5.1833	0.262053	5.1833	0.0152393	0.0906	93.35
4.1256	6.69773	5.1833	0.268375	5.1833	0.0139961	0.0906	92.74
4.4836	6.98864	5.5056	0.176658	5.5056	0.101039	0.1072	90.23
4.4836	7.64318	5.8308	0.232277	5.8308	0.023937	0.1072	93.29
4.8667	6.44318	6.1489	0.35861	6.1489	0.0374636	0.1072	92.2
4.8667	6.47955	6.4694	0.0940246	6.4694	0.291763	0.1239	90.16
5.1833	6.73409	6.4694	0.163151	6.8183	0.0347583	0.1239	93.13
5.1833	6.44318	6.8183	0.117067	7.1431	0.0223641	0.1239	92.38
5.5056	7.20909	7.1431	0.214849	7.4639	0.00076558	0.1406	90.2
5.8308	6.77273	7.4639	0.388821	7.4639	0.0223641	0.1406	93.24
6.1489	7.24545	7.7864	0.310834	8.1381	0.0185526	0.1406	92.32
6.4694	7.75455	8.1381	0.056303	8.4594	0.00076558	0.1572	90.43
6.8183	7.60909	8.1381	0.33483	8.4594	0.0312577	0.1572	93.04
6.8183	7.64545	8.4594	0.384536	12.9364	0.0062104	0.1572	92.44
7.1431	8.11591	8.4594	0.474522	12.9364	0.00747716	0.1739	90.52
7.7864	9.53409	12.9711	0.504435	12.9711	0.00494364	0.1739	92.91
8.4594	10.5159	12.9711	0.519896	12.9711	1.57446	0.1739	92.76
12.9364	13.0417	13.0061	0.578306	13.0061	0.00367687	0.1906	90.49
12.9711	14.4356			13.0061	0.00747716	0.1906	93.09
13.0061	10.5568					0.1906	92.51
						0.2072	89.85
						0.2072	92.87
						0.2072	92.63
						0.2239	90.01
						0.2239	92.97
						0.2239	92.95
						0.2406	89.91
						0.2406	92.97
						0.2406	92.88
						0.2572	90.04
						0.2572	93.29
						0.2572	92.82
						0.2739	90.03
						0.2739	93.11
						0.2739	93.08
						0.2906	90.41
						0.2906	93.48
						0.2906	92.88
						0.3072	90.16
						0.3072	93.23
						0.3072	92.64
						0.3239	87.04
						0.3239	91.87
						0.3239	92.8
						0.3406	76.28
						0.3406	77.87
						0.3406	79
						0.3572	73.87
						0.3572	75.1
						0.3572	75.35
						0.3739	73.49
						0.3739	74.48
						0.3739	75.36
						0.3906	73.13
						0.3906	74.25
						0.3906	75.22
						0.4072	72.9
						0.4072	74.19
						0.4072	74.72
						0.4239	72.63
						0.4239	74.37
						0.4239	74.34
						0.4406	72.55
						0.4406	74.2
						0.4406	74.44
						0.4572	72.41
						0.4572	73.14
						0.4572	74.12
						0.4739	71.58
						0.4739	73.51
						0.4739	74.5
						0.4906	72.14
						0.4906	72.75
						0.4906	73.81
						0.5072	69.19
						0.5072	72.56
						0.5072	73.67
						0.5239	69
						0.5239	72.23
						0.5239	73.33
						0.5406	68.93
						0.5406	71.71
						0.5406	73.98
						0.5572	68.73
						0.5572	71.49
						0.5572	73.24
						0.5739	69.18
						0.5739	71.37
						0.5739	73.43
						0.5906	68.76
						0.5906	70.3
						0.5906	73.71
						0.6072	67.72
						0.6072	70.31
						0.6072	73.34
						0.6239	68.51
						0.6239	70.3
						0.6239	73.88
						0.6406	67.71
						0.6406	70.69
						0.6406	73.13
						0.6572	67.94
						0.6572	69.78
						0.6572	73.85
						0.6739	67.96
						0.6739	69.61
						0.6739	73.9
						0.6906	67.85
						0.6906	68.83
						0.6906	74.34
						0.7072	67.48
						0.7072	68.97
						0.7072	74.02
						0.7239	67.24
						0.7239	69.27
						0.7239	74.53
						0.7406	66.96
						0.7406	69.35
						0.7406	74.66
						0.7572	67.16
						0.7572	69.72
						0.7572	75.01
						0.7739	67.29
						0.7739	69.8
						0.7739	75.43
						0.7906	67.84
						0.7906	70.17
						0.7906	75.94
						0.8072	67.71
						0.8072	71.31
						0.8072	75.42
						0.8239	68.13
						0.8239	71.78
						0.8239	75.14
						0.8406	68.79
						0.8406	72.03
						0.8406	75.24
						0.8572	68.53
						0.8572	72.34
						0.8572	75.25
						0.8739	69.52
						0.8739	72.66
						0.8739	74.9
						0.8906	69.81
						0.8906	72.68
						0.8906	75.06
						0.9072	69.93
						0.9072	72.75
						0.9072	74.59
						0.9239	70.44
						0.9239	72.7
						0.9239	74.2
						0.9406	70.47
						0.9406	72.92
						0.9406	73.96
						0.9572	70.17
						0.9572	72.6
						0.9572	73.5
						0.9739	70.68
						0.9739	71.96
						0.9739	72.79
						0.9906	70.48
						0.9906	71.97
						0.9906	72.55
						1.0072	70.6
						1.0072	71.21
						1.0072	72.22
						1.0239	70.32
						1.0239	70.56
						1.0239	72.11
						1.0406	70.08
						1.0406	69.75
						1.0406	71.81
						1.0572	70.16
						1.0572	69.27
						1.0572	71.31
						1.0739	69.56
						1.0739	68.66
						1.0739	70.82
						1.0906	68.47
						1.0906	67.87
						1.0906	70.58
						1.1072	66.77
						1.1072	67.83
						1.1072	70.82
						1.1239	66.98
						1.1239	67.2
						1.1239	70.39
						1.1406	65.63
						1.1406	66.77
						1.1406	70.29
						1.1572	66.55
						1.1572	66.37
						1.1572	70.33
						1.1739	65.96
						1.1739	66.41
						1.1739	70.69
						1.1906	65.59
						1.1906	66.72
						1.1906	70.42
						1.2072	64.92
						1.2072	67.92
						1.2072	70.3
						1.2239	64.82
						1.2239	67.64
						1.2239	70.2
						1.2406	64.65
						1.2406	67.19
						1.2406	69.86
						1.2572	64.38
						1.2572	67.41
						1.2572	70.03
						1.2739	63.89
						1.2739	66.73
						1.2739	69.95
						1.2906	63.41
						1.2906	67.06
						1.2906	69.66
						1.3072	63.16
						1.3072	66.98
						1.3072	69.5
						1.3239	62.58
						1.3239	66.6
						1.3239	68.89
						1.3406	62.96
						1.3406	66.14
						1.3406	79.42
						1.3572	63.08
						1.3572	65.84
						1.3572	83.62
						1.3739	62.91
						1.3739	65.8
						1.3739	84.55
						1.3906	75.96
						1.3906	64.2
						1.3906	84.58
						1.4072	81.58
						1.4072	64.13
						1.4072	85.51
						1.4239	79.03
						1.4239	63.72
						1.4239	84.81
						1.4406	67.33
						1.4406	63.77
						1.4406	71.41
						1.4572	63.19
						1.4572	63.62
						1.4572	67.51
						1.4739	62.95
						1.4739	63.22
						1.4739	65.56
						1.4906	61.94
						1.4906	63.07
						1.4906	65.7
						1.5072	60.57
						1.5072	62.28
						1.5072	65.49
						1.5239	60.23
						1.5239	61.99
						1.5239	65.5
						1.5406	60.45
						1.5406	62.52
						1.5406	65.21
						1.5572	60.95
						1.5572	62.23
						1.5572	65.46
						1.5739	60.28
						1.5739	62.2
						1.5739	65.15
						1.5906	59.56
						1.5906	61.69
						1.5906	64.58
						1.6072	59.51
						1.6072	62.25
						1.6072	65.17
						1.6239	59.27
						1.6239	61.54
						1.6239	65.21
						1.6406	59.39
						1.6406	62.62
						1.6406	65.25
						1.6572	58.54
						1.6572	61.34
						1.6572	65.25
						1.6739	57.74
						1.6739	61.87
						1.6739	65.44
						1.6906	57.89
						1.6906	61.23
						1.6906	65.05
						1.7072	57.44
						1.7072	60.62
						1.7072	65.46
						1.7239	57.01
						1.7239	60.48
						1.7239	65.64
						1.7406	56.66
						1.7406	60.27
						1.7406	65.53
						1.7572	57.04
						1.7572	59.85
						1.7572	64.96
						1.7739	57.14
						1.7739	59.85
						1.7739	65.35
						1.7906	57.15
						1.7906	58.78
						1.7906	64.74
						1.8072	56.5
						1.8072	59.5
						1.8072	64.43
						1.8239	56.85
						1.8239	58
						1.8239	64.77
						1.8406	56.74
						1.8406	58.39
						1.8406	63.76
						1.8572	55.95
						1.8572	57.31
						1.8572	63.4
						1.8739	55.72
						1.8739	56.78
						1.8739	63.18
						1.8906	55.3
						1.8906	56.57
						1.8906	62.27
						1.9072	54.81
						1.9072	56.59
						1.9072	61.94
						1.9239	54.56
						1.9239	55.86
						1.9239	61.49
						1.9406	53.88
						1.9406	56.24
						1.9406	61.25
						1.9572	53.07
						1.9572	55.86
						1.9572	61
						1.9739	52.98
						1.9739	54.56
						1.9739	60.4
						1.9906	52.09
						1.9906	55.11
						1.9906	59.85
						2.0072	50.83
						2.0072	55.15
						2.0072	60.09
						2.0239	51.02
						2.0239	54.23
						2.0239	59.65
						2.0406	51.17
						2.0406	55.06
						2.0406	60.7
						2.0572	50.57
						2.0572	54.66
						2.0572	60.99
						2.0739	50.43
						2.0739	53.93
						2.0739	60.71
						2.0906	37.4
						2.0906	54.21
						2.0906	59.74
						2.1072	48.2
						2.1072	54.31
						2.1072	59.45
						2.1239	23.06
						2.1239	53.5
						2.1239	62.84
						2.1406	68.51
						2.1406	54.62
						2.1406	76.58
						2.1572	76.49
						2.1572	50.87
						2.1572	78.39
						2.1739	79.47
						2.1739	51
						2.1739	79.35
						2.1906	80.98
						2.1906	51.17
						2.1906	79.2
						2.2072	81.7
						2.2072	50.79
						2.2072	79.8
						2.2239	83.02
						2.2239	67.52
						2.2239	79.69
						2.2406	83.45
						2.2406	76.42
						2.2406	80.1
						2.2572	84.03
						2.2572	78.66
						2.2572	80.91
						2.2739	84.29
						2.2739	79.86
						2.2739	81.05
						2.2906	84.16
						2.2906	79.96
						2.2906	81.61
						2.3072	82.95
						2.3072	79.73
						2.3072	82.22
						2.3239	82.6
						2.3239	77.12
						2.3239	82.78
						2.3406	79.48
						2.3406	78.57
						2.3406	83.81
						2.3572	79.29
						2.3572	79.7
						2.3572	85.4
						2.3739	82.81
						2.3739	80.71
						2.3739	85.35
						2.3906	80.88
						2.3906	79.06
						2.3906	86.21
						2.4072	84.44
						2.4072	79.63
						2.4072	85.89
						2.4239	81.37
						2.4239	74.11
						2.4239	86.15
						2.4406	83.68
						2.4406	80.54
						2.4406	86.24
						2.4572	83.88
						2.4572	79.76
						2.4572	86.43
						2.4739	83.03
						2.4739	72.73
						2.4739	86.67
						2.4906	78.92
						2.4906	73.71
						2.4906	86.77
						2.5072	83.77
						2.5072	80.13
						2.5072	86.59
						2.5239	84.09
						2.5239	79.05
						2.5239	86.53
						2.5406	83.39
						2.5406	81.33
						2.5406	85.72
						2.5572	82.91
						2.5572	81.92
						2.5572	86.12
						2.5739	82.3
						2.5739	82.96
						2.5739	85.78
						2.5906	81.86
						2.5906	83.18
						2.5906	86.02
						2.6072	81.57
						2.6072	84.36
						2.6072	86.24
						2.6239	81.29
						2.6239	84.26
						2.6239	85.86
						2.6406	81.11
						2.6406	84.69
						2.6406	85.76
						2.6572	81
						2.6572	85.04
						2.6572	85.94
						2.6739	80.61
						2.6739	85.15
						2.6739	85.85
						2.6906	81.03
						2.6906	85.31
						2.6906	85.62
						2.7072	80.6
						2.7072	85.4
						2.7072	85.41
						2.7239	59.17
						2.7239	61.18
						2.7239	66.18
						2.7406	46.56
						2.7406	45.67
						2.7406	53.89
						2.7572	58.81
						2.7572	71.06
						2.7572	74
						2.7739	74.76
						2.7739	81.66
						2.7739	82.73
						2.7906	75.58
						2.7906	83.27
						2.7906	83.5
						2.8072	75.52
						2.8072	83.65
						2.8072	83.7
						2.8239	67.51
						2.8239	72.59
						2.8239	78.06
						2.8406	47.2
						2.8406	47.61
						2.8406	55.51
						2.8572	41.55
						2.8572	56.48
						2.8572	53.53
						2.8739	65.75
						2.8739	78.04
						2.8739	78.79
						2.8906	73.88
						2.8906	82.12
						2.8906	81.21
						2.9072	75.04
						2.9072	82.4
						2.9072	81.69
						2.9239	77.78
						2.9239	83.36
						2.9239	81.57
						2.9406	77.99
						2.9406	83.73
						2.9406	83.53
						2.9572	56.94
						2.9572	60.59
						2.9572	66.37
						2.9739	42.71
						2.9739	44.7
						2.9739	53.99
						2.9906	49.91
						2.9906	59.46
						2.9906	59.96
						3.0072	71.31
						3.0072	78.83
						3.0072	79.22
						3.0239	75.53
						3.0239	81.86
						3.0239	80.61
						3.0406	76.84
						3.0406	82.88
						3.0406	80.35
						3.0572	77.19
						3.0572	83.36
						3.0572	82.08
						3.0739	59.73
						3.0739	65.31
						3.0739	70.06
						3.0906	43.35
						3.0906	44.87
						3.0906	54.73
						3.1072	63.7
						3.1072	73.09
						3.1072	74.8
						3.1239	75.08
						3.1239	81.93
						3.1239	79.85
						3.1406	76.39
						3.1406	82.95
						3.1406	80
						3.1572	75.65
						3.1572	83.45
						3.1572	85.06
						3.1739	77.62
						3.1739	83.8
						3.1739	86.46
						3.1906	50.49
						3.1906	55.73
						3.1906	62.54
						3.2072	38.74
						3.2072	42.83
						3.2072	52.3
						3.2239	60.93
						3.2239	73.2
						3.2239	72.54
						3.2406	74.1
						3.2406	80.6
						3.2406	79.11
						3.2572	74.91
						3.2572	81.62
						3.2572	79.03
						3.2739	76.05
						3.2739	82.08
						3.2739	83.27
						3.2906	77.2
						3.2906	82.46
						3.2906	86.02
						3.3072	69.85
						3.3072	78.2
						3.3072	83.5
						3.3239	43.86
						3.3239	48.48
						3.3239	56.05
						3.3406	45.67
						3.3406	54.57
						3.3406	61.46
						3.3572	70.8
						3.3572	77.46
						3.3572	77.5
						3.3739	75.28
						3.3739	80.69
						3.3739	78.69
						3.3906	75.09
						3.3906	80.98
						3.3906	83.34
						3.4072	75.76
						3.4072	81.55
						3.4072	85.53
						3.4239	61.05
						3.4239	69.03
						3.4239	73.58
						3.4406	40.04
						3.4406	45.66
						3.4406	54.74
						3.4572	58.27
						3.4572	65.76
						3.4572	63.72
						3.4739	73.12
						3.4739	79.35
						3.4739	77.16
						3.4906	73.93
						3.4906	80.33
						3.4906	78.61
						3.5072	72.65
						3.5072	80.82
						3.5072	83.71
						3.5239	69.96
						3.5239	80.23
						3.5239	84.8
						3.5406	41.91
						3.5406	49.48
						3.5406	46.78
						3.5572	35.73
						3.5572	40.22
						3.5572	26.53
						3.5739	62.6
						3.5739	70.18
						3.5739	24.31
						3.5906	71.28
						3.5906	78.2
						3.5906	30.11
						3.6072	71.4
						3.6072	78.37
						3.6072	26.8
						3.6239	71.56
						3.6239	80.49
						3.6239	22.17
						3.6406	58.49
						3.6406	68.28
						3.6406	10.15
						3.6572	38.2
						3.6572	46.23
						3.6572	2.06
						3.6739	46.85
						3.6739	63.21
						3.6739	1.47
						3.6906	68.81
						3.6906	75.14
						3.6906	15.18
						3.7072	70.08
						3.7072	77.41
						3.7072	61.63
						3.7239	70.51
						3.7239	82.44
						3.7239	74.89
						3.7406	63.04
						3.7406	73.95
						3.7406	71.57
						3.7572	40.34
						3.7572	46.37
						3.7572	46.44
						3.7739	35.38
						3.7739	45.21
						3.7739	40.83
						3.7906	66.27
						3.7906	72.86
						3.7906	71.07
						3.8072	69.13
						3.8072	77.39
						3.8072	77
						3.8239	70.56
						3.8239	77.15
						3.8239	77.67
						3.8406	70.57
						3.8406	83.58
						3.8406	77.63
						3.8572	43.91
						3.8572	50.27
						3.8572	50.82
						3.8739	35.56
						3.8739	40.64
						3.8739	40.69
						3.8906	60.77
						3.8906	64.86
						3.8906	62.9
						3.9072	69.13
						3.9072	75.95
						3.9072	75.14
						3.9239	66.4
						3.9239	76.27
						3.9239	76.65
						3.9406	70.05
						3.9406	81.63
						3.9406	76.41
						3.9572	67.42
						3.9572	80.27
						3.9572	76.8
						3.9739	42.04
						3.9739	46.79
						3.9739	47.89
						3.9906	34.7
						3.9906	37.48
						3.9906	40.73
						4.0072	62.14
						4.0072	64.17
						4.0072	65.81
						4.0239	69.28
						4.0239	74.83
						4.0239	74.76
						4.0406	68.69
						4.0406	74.99
						4.0406	74.85
						4.0572	71.59
						4.0572	81.17
						4.0572	80.06
						4.0739	76.4
						4.0739	83.85
						4.0739	83.41
						4.0906	61.77
						4.0906	72.42
						4.0906	75.99
						4.1072	36.18
						4.1072	44.03
						4.1072	46.56
						4.1239	59.98
						4.1239	66.69
						4.1239	67.77
						4.1406	70.61
						4.1406	77.15
						4.1406	76.73
						4.1572	73.83
						4.1572	81.99
						4.1572	81.23
						4.1739	75.92
						4.1739	83.86
						4.1739	81.43
						4.1906	75.48
						4.1906	84.61
						4.1906	72.05
						4.2072	49.11
						4.2072	55.86
						4.2072	44.37
						4.2239	36.37
						4.2239	39.29
						4.2239	18.31
						4.2406	61.52
						4.2406	66.05
						4.2406	22.71
						4.2572	68.45
						4.2572	75.3
						4.2572	15.17
						4.2739	67.98
						4.2739	81.17
						4.2739	12.83
						4.2906	71.44
						4.2906	84.05
						4.2906	10.54
						4.3072	74.94
						4.3072	86.04
						4.3072	11.55
						4.3239	76.6
						4.3239	86.72
						4.3239	5.47
						4.3406	40.63
						4.3406	49.88
						4.3406	1.3
						4.3572	34.08
						4.3572	38.21
						4.3572	0.95
						4.3739	65.31
						4.3739	69.3
						4.3739	14.15
						4.3906	69.3
						4.3906	76.4
						4.3906	57.57
						4.4072	73.57
						4.4072	82.5
						4.4072	72.63
						4.4239	75.33
						4.4239	84.29
						4.4239	73.39
						4.4406	70.57
						4.4406	85.67
						4.4406	73.68
						4.4572	40.01
						4.4572	49.47
						4.4572	46.02
						4.5056	32.41
						4.5056	38.46
						4.5056	37.21
						4.5136	72.33
						4.5136	81.32
						4.5136	72.4
						4.5303	71.31
						4.5303	83.9
						4.5303	72.55
						4.5469	63.96
						4.5469	85.73
						4.5469	79.9
						4.5636	76.28
						4.5636	87.14
						4.5636	82.85
						4.5803	50.17
						4.5803	65.09
						4.5803	64.8
						4.5969	21.22
						4.5969	41.12
						4.5969	43.57
						4.6136	34.22
						4.6136	60.97
						4.6136	62.38
						4.6303	65.2
						4.6303	73.73
						4.6303	73.14
						4.6469	72.72
						4.6469	81.97
						4.6469	78.41
						4.6636	74.8
						4.6636	84.44
						4.6636	81.51
						4.6803	76.6
						4.6803	86.38
						4.6803	83.78
						4.6969	77.92
						4.6969	87.62
						4.6969	85.3
						4.7136	79.27
						4.7136	88.43
						4.7136	85.89
						4.7303	46.1
						4.7303	60.25
						4.7303	57.34
						4.7469	13.85
						4.7469	41.69
						4.7469	28.46
						4.7636	29.99
						4.7636	62.32
						4.7636	16.14
						4.7803	63.17
						4.7803	74.21
						4.7803	22.4
						4.7969	66.29
						4.7969	82.18
						4.7969	15.23
						4.8136	73.7
						4.8136	85.06
						4.8136	15.3
						4.8303	64.11
						4.8303	80.54
						4.8303	11.08
						4.8469	28.58
						4.8469	42.81
						4.8469	6
						4.8636	28.46
						4.8636	34.58
						4.8636	31.71
						4.8803	58.32
						4.8803	64.24
						4.8803	34.51
						4.8969	47.33
						4.8969	73.28
						4.8969	63.14
						4.9136	60.03
						4.9136	78.2
						4.9136	69.42
						4.9303	47.57
						4.9303	76.86
						4.9303	70.11
						4.9469	27.84
						4.9469	32.79
						4.9469	45.38
						4.9636	19.17
						4.9636	24.17
						4.9636	37.53
						4.9803	53.67
						4.9803	61.09
						4.9803	67.71
						4.9969	57.81
						4.9969	68.95
						4.9969	71.5
						5.0136	68.41
						5.0136	78.3
						5.0136	75.56
						5.0303	72.02
						5.0303	81.38
						5.0303	80.35
						5.0469	47.91
						5.0469	59.75
						5.0469	65.72
						5.0636	25.16
						5.0636	32.21
						5.0636	41.3
						5.0803	20.07
						5.0803	25.04
						5.0803	29.84
						5.0969	48.3
						5.0969	58.49
						5.0969	53.05
						5.1136	48.14
						5.1136	66.65
						5.1136	60.33
						5.1303	61.19
						5.1303	76.21
						5.1303	50.24
						5.1469	55.4
						5.1469	72.34
						5.1469	48.57
						5.1636	21.68
						5.1636	32.78
						5.1636	6.47
						5.1803	15.19
						5.1803	23.69
						5.1803	2.24
						5.1969	33.18
						5.1969	54.58
						5.1969	1.51
						5.2136	52.64
						5.2136	66.61
						5.2136	1.14
						5.2303	53.41
						5.2303	75.7
						5.2303	0.84
						5.2469	67.42
						5.2469	79.45
						5.2469	0.69
						5.2636	30.51
						5.2636	40.32
						5.2636	0.57
						5.2803	19.71
						5.2803	28.43
						5.2803	0.41
						5.2969	23.29
						5.2969	41
						5.2969	1.07
						5.3136	49.72
						5.3136	63.3
						5.3136	17.52
						5.3303	46.55
						5.3303	69.47
						5.3303	28.28
						5.3469	62.49
						5.3469	77.34
						5.3469	50.25
						5.3636	55.52
						5.3636	75
						5.3636	57.12
						5.3803	12.71
						5.3803	28.48
						5.3803	15.06
						5.3969	7.09
						5.3969	15.67
						5.3969	13.54
						5.4136	9.1
						5.4136	25.95
						5.4136	13.02
						5.4303	39.61
						5.4303	57.09
						5.4303	28.71
						5.4469	41.43
						5.4469	56.98
						5.4469	46.74
						5.4636	48.41
						5.4636	70.73
						5.4636	56.27
						5.4803	9.42
						5.4803	16.45
						5.4803	18.72
						5.4969	5.18
						5.4969	3.39
						5.4969	2.22
						5.5136	6.98
						5.5136	2.19
						5.5136	1.16
						5.5303	43.56
						5.5303	1.67
						5.5303	0.77
						5.5469	44.46
						5.5469	1.3
						5.5469	0.54
						5.5636	45.97
						5.5636	1.11
						5.5636	0.34
						5.5803	12.12
						5.5803	0.9
						5.5803	0.25
						5.5969	5.51
						5.5969	0.75
						5.5969	0.12
						5.6136	4.6
						5.6136	0.67
						5.6136	0.07
						5.6303	41.27
						5.6303	0.56
						5.6303	0
						5.6469	41.9
						5.6469	0.45
						5.6469	0
						5.6636	41.03
						5.6636	0.68
						5.6636	0.81
						5.6803	61.14
						5.6803	2.42
						5.6803	2.61
						5.6969	12.75
						5.6969	17.83
						5.6969	22.76
						5.7136	3.51
						5.7136	12.55
						5.7136	19.4
						5.7303	33.72
						5.7303	4.83
						5.7303	9.27
						5.7469	43.59
						5.7469	24.84
						5.7469	8.72
						5.7636	40.65
						5.7636	39.04
						5.7636	13.04
						5.7803	55.99
						5.7803	45.98
						5.7803	6.5
						5.7969	29.49
						5.7969	39.63
						5.7969	30.81
						5.8136	4.54
						5.8136	10.06
						5.8136	9.37
						5.8303	15.94
						5.8303	7.1
						5.8303	7.11
						5.8469	46.69
						5.8469	41.44
						5.8469	35.51
						5.8636	43.33
						5.8636	61.22
						5.8636	53.41
						5.8803	60.82
						5.8803	61.49
						5.8803	62.97
						5.8969	38.42
						5.8969	51.31
						5.8969	49.65
						5.9136	5.98
						5.9136	16.94
						5.9136	3.75
						5.9303	8.51
						5.9303	10.69
						5.9303	7.11
						5.9469	44.32
						5.9469	53.46
						5.9469	28.32
						5.9636	41.91
						5.9636	60.6
						5.9636	52.91
						5.9803	55.86
						5.9803	68.12
						5.9803	59.64
						5.9969	62.07
						5.9969	73.48
						5.9969	60.77
						6.0136	19.7
						6.0136	39.81
						6.0136	37.92
						6.0303	5.59
						6.0303	15.28
						6.0303	3.46
						6.0469	11.71
						6.0469	12.58
						6.0469	1.55
						6.0636	41.74
						6.0636	52.94
						6.0636	0.89
						6.0803	38.96
						6.0803	57.32
						6.0803	0.58
						6.0969	58.89
						6.0969	68.74
						6.0969	0.39
						6.1136	35.98
						6.1136	54.31
						6.1136	0.24
						6.1303	4.95
						6.1303	16.54
						6.1303	0.11
						6.1469	3.14
						6.1469	9.98
						6.1469	0.05
						6.1636	34.35
						6.1636	42.25
						6.1636	0
						6.1803	33.77
						6.1803	54.44
						6.1803	0
						6.1969	50.29
						6.1969	60.89
						6.1969	0
						6.2136	41.06
						6.2136	60.36
						6.2136	0.3
						6.2303	5.15
						6.2303	16.51
						6.2303	1.29
						6.2469	4.22
						6.2469	4.86
						6.2469	5.88
						6.2636	37.57
						6.2636	4.61
						6.2636	10.89
						6.2803	35.47
						6.2803	7.4
						6.2803	14.02
						6.2969	55.95
						6.2969	1.43
						6.2969	34.64
						6.3136	63.12
						6.3136	0.94
						6.3136	35.4
						6.3303	23.53
						6.3303	0.72
						6.3303	15.67
						6.3469	4.63
						6.3469	0.57
						6.3469	2.48
						6.3636	2.88
						6.3636	0.48
						6.3636	5.58
						6.3803	25.72
						6.3803	3.02
						6.3803	6.11
						6.3969	32.08
						6.3969	18.18
						6.3969	29.03
						6.4136	47.92
						6.4136	38.64
						6.4136	38.14
						6.4303	54.03
						6.4303	55.62
						6.4303	54.77
						6.4469	3.34
						6.4469	6.8
						6.4469	10.63
						6.4636	2.95
						6.4636	5.5
						6.4636	8.11
						6.4803	3.94
						6.4803	3.98
						6.4803	8.31
						6.4969	27.52
						6.4969	34.51
						6.4969	40.44
						6.5136	41.58
						6.5136	50.76
						6.5136	57.12
						6.5303	56.43
						6.5303	53.73
						6.5303	59.66
						6.5469	20.97
						6.5469	40.53
						6.5469	46.45
						6.5636	3.47
						6.5636	8.67
						6.5636	9.05
						6.5803	2.39
						6.5803	6.96
						6.5803	8.36
						6.5969	32.59
						6.5969	37.64
						6.5969	34.6
						6.6136	44.42
						6.6136	49.77
						6.6136	54.57
						6.6303	55.52
						6.6303	58.01
						6.6303	56.84
						6.6469	60.53
						6.6469	67.02
						6.6469	67.31
						6.6636	9.54
						6.6636	29.6
						6.6636	35.14
						6.6803	4.03
						6.6803	8.3
						6.6803	11.82
						6.6969	11.78
						6.6969	6.97
						6.6969	9.91
						6.7136	37.41
						6.7136	46.51
						6.7136	48.43
						6.7303	52.55
						6.7303	50.57
						6.7303	57.41
						6.7469	59.05
						6.7469	63.65
						6.7469	59.03
						6.7636	30.17
						6.7636	48.53
						6.7636	53.34
						6.7803	3.55
						6.7803	10.23
						6.7803	14.39
						6.7969	1.61
						6.7969	6.21
						6.7969	9.39
						6.8136	19.84
						6.8136	40.69
						6.8136	38.53
						6.8303	36.06
						6.8303	47.91
						6.8303	54
						6.8469	39.33
						6.8469	52.43
						6.8469	54.13
						6.8636	56.25
						6.8636	67.93
						6.8636	68.52
						6.8803	62.66
						6.8803	72.28
						6.8803	72.69
						6.8969	7.17
						6.8969	26.82
						6.8969	32.04
						6.9136	2.08
						6.9136	3.3
						6.9136	7.81
						6.9303	1.18
						6.9303	1.88
						6.9303	7.03
						6.9469	22.87
						6.9469	1.31
						6.9469	37.27
						6.9636	21.86
						6.9636	29.99
						6.9636	51.67
						6.9803	4.44
						6.9803	48.1
						6.9803	51.88
						6.9969	48.8
						6.9969	48.94
						6.9969	67.4
						7.0136	2.8
						7.0136	10.96
						7.0136	15.57
						7.0303	1.27
						7.0303	6.02
						7.0303	7.69
						7.0469	0.84
						7.0469	6.86
						7.0469	6.33
						7.0636	0.69
						7.0636	45.63
						7.0636	42.31
						7.0803	37.76
						7.0803	48.99
						7.0803	51.51
						7.0969	38.36
						7.0969	57.78
						7.0969	52.95
						7.1136	3.94
						7.1136	23.95
						7.1136	29.11
						7.1303	1.04
						7.1303	5.02
						7.1303	7.48
						7.1469	0.57
						7.1469	4.22
						7.1469	6.15
						7.1636	30.88
						7.1636	35.74
						7.1636	36.78
						7.1803	38.58
						7.1803	45.91
						7.1803	34.62
						7.1969	37.84
						7.1969	46.5
						7.1969	23.07
						7.2136	8.86
						7.2136	25.58
						7.2136	4.16
						7.2303	1.34
						7.2303	5.15
						7.2303	1.2
						7.2469	0.66
						7.2469	1.6
						7.2469	0.73
						7.2636	20.63
						7.2636	0.97
						7.2636	0.47
						7.2803	38.29
						7.2803	0.7
						7.2803	0.27
						7.2969	38.21
						7.2969	0.49
						7.2969	0.21
						7.3136	36.49
						7.3136	0.35
						7.3136	0.09
						7.3303	3.95
						7.3303	1.57
						7.3303	0.01
						7.3469	1.19
						7.3469	0.36
						7.3469	0
						7.3636	0.62
						7.3636	0.51
						7.3636	0
						7.3803	15.08
						7.3803	6.61
						7.3803	0.13
						7.3969	36.07
						7.3969	29.95
						7.3969	3.67
						7.4136	28.68
						7.4136	50.74
						7.4136	20.87
						7.4303	7.58
						7.4303	25.86
						7.4303	19.41
						7.4469	1.13
						7.4469	2.26
						7.4469	5.27
						7.4636	0.52
						7.4636	1.62
						7.4636	0.93
						7.4803	8.6
						7.4803	9.06
						7.4803	0.13
						7.4969	36.52
						7.4969	33.45
						7.4969	0
						7.5136	38.29
						7.5136	28.11
						7.5136	0
						7.5303	13.83
						7.5303	22.57
						7.5303	12.02
						7.5469	1.36
						7.5469	2.29
						7.5469	1.5
						7.5636	0.59
						7.5636	1.55
						7.5636	0.07
						7.5803	1.18
						7.5803	1.15
						7.5803	0.28
						7.5969	1.52
						7.5969	33.52
						7.5969	16.6
						7.6136	30.38
						7.6136	46.79
						7.6136	20.33
						7.6303	42.11
						7.6303	50.12
						7.6303	26.45
						7.6469	4.15
						7.6469	31.55
						7.6469	23.99
						7.6636	0.91
						7.6636	2.97
						7.6636	1.62
						7.6803	0.38
						7.6803	1.98
						7.6803	1.2
						7.6969	8.85
						7.6969	18.22
						7.6969	10.06
						7.7136	31.75
						7.7136	44.35
						7.7136	29.15
						7.7303	38.34
						7.7303	49.25
						7.7303	47.98
						7.7469	34.84
						7.7469	46.5
						7.7469	53.24
						7.7636	1.58
						7.7636	4.55
						7.7636	5.73
						7.7803	0.62
						7.7803	1.83
						7.7803	2.3
						7.7969	2.31
						7.7969	13.54
						7.7969	12.2
						7.8136	25.63
						7.8136	41.94
						7.8136	32.89
						7.8303	37.13
						7.8303	47.99
						7.8303	49.22
						7.8469	36.33
						7.8469	50.75
						7.8469	51.84
						7.8636	41.33
						7.8636	60.12
						7.8636	61.72
						7.8803	40.67
						7.8803	68.62
						7.8803	57.32
						7.8969	2.05
						7.8969	5.63
						7.8969	8.43
						7.9136	0.83
						7.9136	2.94
						7.9136	3.1
						7.9303	0.42
						7.9303	9.93
						7.9303	10.46
						7.9469	20.88
						7.9469	35.07
						7.9469	37.76
						7.9636	34.35
						7.9636	45.5
						7.9636	48.74
						7.9803	36.76
						7.9803	47.92
						7.9803	50.18
						7.9969	8.63
						7.9969	50.14
						7.9969	57.14
						8.0136	1.18
						8.0136	4.32
						8.0136	5.79
						8.0303	0.51
						8.0303	2.06
						8.0303	2.86
						8.0469	0.22
						8.0469	26.17
						8.0469	21.58
						8.0636	0.07
						8.0636	46.57
						8.0636	44.95
						8.0803	1.91
						8.0803	49.16
						8.0803	49.13
						8.0969	8.92
						8.0969	51.05
						8.0969	50.93
						8.1136	0.2
						8.1136	7.16
						8.1136	10.82
						8.1303	0
						8.1303	1.98
						8.1303	2.91
						8.1469	0
						8.1469	3.86
						8.1469	7.78
						8.1636	7.23
						8.1636	40.35
						8.1636	35.82
						8.1803	8.87
						8.1803	44.52
						8.1803	48.3
						8.1969	24.13
						8.1969	46.55
						8.1969	48.17
						8.2136	0.81
						8.2136	7.03
						8.2136	10.67
						8.2303	0.07
						8.2303	1.77
						8.2303	2.45
						8.2469	0
						8.2469	4.05
						8.2469	1.63
						8.2636	0.42
						8.2636	38.34
						8.2636	27.13
						8.2803	14.55
						8.2803	43.99
						8.2803	45
						8.2969	30.15
						8.2969	46.12
						8.2969	48.91
						8.3136	24.42
						8.3136	63.64
						8.3136	58.43
						8.3303	0.74
						8.3303	5.79
						8.3303	9.22
						8.3469	0.12
						8.3469	1.78
						8.3469	1.86
						8.3636	0
						8.3636	8.36
						8.3636	4.67
						8.3803	8.26
						8.3803	36.52
						8.3803	31.43
						8.3969	4.38
						8.3969	42.79
						8.3969	46.02
						8.4136	18.61
						8.4136	44.49
						8.4136	47.58
						8.4303	0.53
						8.4303	9.92
						8.4303	13.23
						8.4469	0
						8.4469	1.84
						8.4469	1.89
						8.4636	0
						8.4636	2.65
						8.4636	1.42
						8.4803	0
						8.4803	34.35
						8.4803	26.4
						8.4969	0
						8.4969	40.95
						8.4969	44.35
						8.5136	0
						8.5136	37.26
						8.5136	46.32
						8.5303	0
						8.5303	38.13
						8.5303	47.24
						8.5469	0
						8.5469	2.52
						8.5469	3.33
						8.5636	0
						8.5636	1.17
						8.5636	1.32
						8.5803	0
						8.5803	0.74
						8.5803	2.4
						8.7142	0
						8.7142	16.78
						8.7142	21.47
						8.7169	0
						8.7169	16.8
						8.7169	21.48
						8.7208	0
						8.7208	4.06
						8.7208	4.91
						8.7383	49.19
						8.7383	19.77
						8.7383	67.56
						8.7561	51.24
						8.7561	64.14
						8.7561	67.97
						8.7728	43.87
						8.7728	73.4
						8.7728	69.4
						8.7894	40.39
						8.7894	72.9
						8.7894	63.97
						8.8061	27.43
						8.8061	78.52
						8.8061	70.16
						8.8228	26.98
						8.8228	79.04
						8.8228	62.55
						8.8394	27.59
						8.8394	73.24
						8.8394	54.36
						8.8561	6.79
						8.8561	73.85
						8.8561	56.55
						8.8728	1.4
						8.8728	66.66
						8.8728	67.23
						8.8894	39.33
						8.8894	62.28
						8.8894	82.18
						8.9061	57.82
						8.9061	70.09
						8.9061	83.98
						8.9228	53.51
						8.9228	83.41
						8.9228	81.65
						8.9394	50.56
						8.9394	85.85
						8.9394	84.58
						8.9561	66.13
						8.9561	86.43
						8.9561	85.6
						8.9728	54.97
						8.9728	83.19
						8.9728	85.92
						8.9894	62.26
						8.9894	76.82
						8.9894	85.69
						9.0061	61.06
						9.0061	74.64
						9.0061	85.73
						9.0228	52.06
						9.0228	80.39
						9.0228	86.75
						9.0394	63.51
						9.0394	84.99
						9.0394	86.9
						9.0561	68.56
						9.0561	86.95
						9.0561	83.79
						9.0728	73.68
						9.0728	87.76
						9.0728	86.02
						9.0894	76.35
						9.0894	88.4
						9.0894	86.52
						9.1061	67.09
						9.1061	88.71
						9.1061	87.33
						9.1228	78.4
						9.1228	89.21
						9.1228	87.92
						9.1394	77.56
						9.1394	89.41
						9.1394	87.95
						9.1561	68.39
						9.1561	89.97
						9.1561	87.92
						9.1728	74.74
						9.1728	89.73
						9.1728	88.39
						9.1894	76.09
						9.1894	90.39
						9.1894	88.47
						9.2061	80.81
						9.2061	90.1
						9.2061	88.66
						9.2228	83.09
						9.2228	90.25
						9.2228	88.85
						9.2394	83.33
						9.2394	90.37
						9.2394	89.01
						9.2561	83.33
						9.2561	90.73
						9.2561	88.93
						9.2728	84.53
						9.2728	90.67
						9.2728	89.21
						9.2894	84.07
						9.2894	91.27
						9.2894	89.71
						9.3061	84.97
						9.3061	91.15
						9.3061	89.62
						9.3228	85.88
						9.3228	91.14
						9.3228	89.91
						9.3394	85.07
						9.3394	90.63
						9.3394	89.58
						9.3561	85.3
						9.3561	91.38
						9.3561	89.8
						9.3728	85.64
						9.3728	91.18
						9.3728	90.27
						9.3894	86.57
						9.3894	91.4
						9.3894	90.48
						9.4061	85.99
						9.4061	91.79
						9.4061	90.49
						9.4228	86.67
						9.4228	87.96
						9.4228	91.18
						9.4394	87.01
						9.4394	91.9
						9.4394	90.74
						9.4561	85.59
						9.4561	92.07
						9.4561	90.72
						9.4728	86.38
						9.4728	90.77
						9.4728	91.25
						9.4894	87.45
						9.4894	92.21
						9.4894	90.67
						9.5061	86.99
						9.5061	92.12
						9.5061	91.06
						9.5228	87.46
						9.5228	92.24
						9.5228	91.45
						9.5394	77.72
						9.5394	90.65
						9.5394	91.37
						9.5561	15.6
						9.5561	17.16
						9.5561	25.49
						9.5728	3.48
						9.5728	4.23
						9.5728	7.6
						9.5894	31.15
						9.5894	6.52
						9.5894	7.57
						9.6061	36.45
						9.6061	46.95
						9.6061	52.03
						9.6228	44.69
						9.6228	46.46
						9.6228	58.34
						9.6394	62.28
						9.6394	67.3
						9.6394	72.07
						9.6561	46.51
						9.6561	54.39
						9.6561	67.02
						9.6728	3.71
						9.6728	5.32
						9.6728	14.99
						9.6894	1.99
						9.6894	2.55
						9.6894	3.66
						9.7061	20.08
						9.7061	6.75
						9.7061	16.24
						9.7228	39.37
						9.7228	39.46
						9.7228	48.53
						9.7394	43.38
						9.7394	44.59
						9.7394	51.88
						9.7561	45.83
						9.7561	59.89
						9.7561	67.41
						9.7728	40.07
						9.7728	50.01
						9.7728	61.69
						9.7894	2.87
						9.7894	3.96
						9.7894	9.18
						9.8061	1.56
						9.8061	2.08
						9.8061	2.5
						9.8228	1.09
						9.8228	1.47
						9.8228	1.61
						9.8394	0.8
						9.8394	1.15
						9.8394	1.22
						9.8561	0.64
						9.8561	0.94
						9.8561	0.99
						9.8728	0.52
						9.8728	0.79
						9.8728	0.82
						9.8894	0.41
						9.8894	0.7
						9.8894	0.71
						9.9061	0.36
						9.9061	0.62
						9.9061	0.59
						9.9228	0.27
						9.9228	0.57
						9.9228	0.54
						9.9394	0.23
						9.9394	0.46
						9.9394	0.51
						9.9561	0.18
						9.9561	0.45
						9.9561	0.48
						9.9728	0.12
						9.9728	0.42
						9.9728	0.4
						9.9894	0.09
						9.9894	0.39
						9.9894	0.37
						10.0061	0.07
						10.0061	0.34
						10.0061	0.33
						10.0228	0.01
						10.0228	0.31
						10.0228	8.48
						10.0394	0
						10.0394	0.29
						10.0394	16.81
						10.0561	0
						10.0561	2.49
						10.0561	1.03
						10.0728	0
						10.0728	1.36
						10.0728	2.21
						10.0894	0
						10.0894	1.84
						10.0894	0.23
						10.1061	0
						10.1061	0.74
						10.1061	0.16
						10.1228	0
						10.1228	8.24
						10.1228	0.28
						10.1394	0
						10.1394	40.58
						10.1394	0.05
						10.1561	0
						10.1561	48.47
						10.1561	35.46
						10.1728	0
						10.1728	62.51
						10.1728	24.81
						10.1894	0
						10.1894	64.2
						10.1894	53.27
						10.2061	0
						10.2061	60.99
						10.2061	41.11
						10.2228	0
						10.2228	66.48
						10.2228	35.09
						10.2397	0
						10.2397	73.78
						10.2397	26.38
						10.2561	0
						10.2561	75.66
						10.2561	40.25
						10.2728	2.59
						10.2728	76.67
						10.2728	52.09
						10.2894	1.89
						10.2894	77.49
						10.2894	51.39
						10.3061	0
						10.3061	78.08
						10.3061	50.05
						10.3228	0
						10.3228	79.33
						10.3228	49.62
						10.3394	7.29
						10.3394	78.96
						10.3394	44.94
						10.3561	2.5
						10.3561	74.31
						10.3561	38.77
						10.3728	17.11
						10.3728	76.4
						10.3728	33.47
						10.3894	38.45
						10.3894	76.2
						10.3894	70.56
						10.4061	38.65
						10.4061	71.3
						10.4061	71.58
						10.4228	44.7
						10.4228	76.14
						10.4228	75.46
						10.4394	48.96
						10.4394	68.39
						10.4394	82.1
						10.4561	34.7
						10.4561	70.78
						10.4561	76.92
						10.4728	21.2
						10.4728	64.18
						10.4728	79.25
						10.4894	42.72
						10.4894	72.09
						10.4894	74.06
						10.5061	41.96
						10.5061	69.3
						10.5061	67.97
						10.5228	55.9
						10.5228	66.92
						10.5228	73.05
						10.5394	49.03
						10.5394	64.3
						10.5394	77.43
						10.5561	60.08
						10.5561	61.64
						10.5561	72.48
						10.5728	64.65
						10.5728	57.57
						10.5728	85.06
						10.5894	16
						10.5894	29.57
						10.5894	63.77
						10.6061	2.44
						10.6061	3.6
						10.6061	4.77
						10.6228	1.29
						10.6228	2.15
						10.6228	2.49
						10.6394	0.78
						10.6394	1.6
						10.6394	9.89
						10.6561	0.49
						10.6561	1.23
						10.6561	24.25
						10.6728	0.29
						10.6728	0.97
						10.6728	13.02
						10.6894	0.15
						10.6894	0.79
						10.6894	21.91
						10.7061	0
						10.7061	0.62
						10.7061	5.08
						10.7228	0
						10.7228	0.5
						10.7228	1.31
						10.7394	0
						10.7394	0.43
						10.7394	0.85
						10.7561	0
						10.7561	0.38
						10.7561	0.6
						10.7728	0
						10.7728	0.32
						10.7728	6.48
						10.7894	0
						10.7894	0.31
						10.7894	0.72
						10.8061	0
						10.8061	13.69
						10.8061	14.49
						10.8228	0
						10.8228	2.48
						10.8228	10.46
						10.8394	0
						10.8394	0.58
						10.8394	0.65
						10.8561	0
						10.8561	0.32
						10.8561	0.35
						10.8728	0
						10.8728	3.85
						10.8728	0.21
						10.8894	0
						10.8894	21.77
						10.8894	7.84
						10.9061	0
						10.9061	39.34
						10.9061	7.75
						10.9228	0
						10.9228	29.61
						10.9228	25.28
						10.9394	0
						10.9394	3.9
						10.9394	4.07
						10.9561	0
						10.9561	1.11
						10.9561	0.65
						10.9728	0
						10.9728	0.6
						10.9728	0.26
						10.9894	0
						10.9894	0.38
						10.9894	0.13
						11.0061	0
						11.0061	0.26
						11.0061	0
						11.0228	0
						11.0228	6.46
						11.0228	0
						11.0394	0
						11.0394	0.24
						11.0394	0
						11.0561	0
						11.0561	0.4
						11.0561	0
						11.0728	0
						11.0728	0.14
						11.0728	0
						11.0894	0
						11.0894	0.05
						11.0894	0
						11.1061	0
						11.1061	0.1
						11.1061	0
						11.1228	0
						11.1228	8.79
						11.1228	0
						11.1394	0
						11.1394	17.14
[truncated: 370 more rows]

## Sheet: Strain 3
Escherichia coli BW25113 ΔompT
Biomass		Acetate		Glucose		DOT
Time [h]	Values [g/L]	Time [h]	Values [g/L]	Time [h]	Values [g/L]	Time [h]	Values [%]
0.0792	3.31742	0.5603	0.444105	0.5603	3.00832	0.0069	90.11
0.0792	3.35379	0.5603	0.45923	0.5603	3.03811	0.0069	91.62
0.1156	2.78409	0.8592	0.460176	0.8592	1.68855	0.0069	91.07
0.1156	3.01439	0.8592	0.445996	0.8592	1.77403	0.0097	90.21
0.1522	2.59015	1.1567	0.439378	1.1567	0.0164893	0.0097	91.55
0.1522	2.62652	1.1567	0.437488	1.1567	0.0074231	0.0097	91.17
0.5603	3.66667	1.4631	0.458285	1.4631	4.07165	0.0125	89.97
0.5603	3.5697	1.4631	0.442214	1.4631	4.139	0.0125	91.44
0.8592	3.66667	1.7622	0.415745	1.7622	1.17696	0.0125	91.41
0.8592	3.52121	1.7622	0.441269	1.7622	1.4593	0.0153	90.26
1.1567	3.64242	2.0658	0.389858	2.0658	0.0182755	0.0153	91.68
1.1567	3.76364	2.0658	0.384216	2.0658	0.0182755	0.0153	91.05
1.4631	4.87879	2.4069	0.252028	2.4069	0.0169363	0.0181	89.86
1.4631	4.85455	2.4069	0.235101	2.4069	0.0155971	0.0181	91.98
1.7622	4.90303	2.7531	0.0779256	2.7531	0.0169363	0.0181	91.65
1.7622	4.68485	2.7531	0.0674472	2.7531	0.0115793	0.0219	89.33
2.0658	5.02727	3.1097	0.164977	3.1097	0.020954	0.0219	93.26
2.0658	4.91818	3.1097	0.153692	3.1097	0.00890083	0.0219	91.97
2.4069	6.44545	3.4567	0.178679	3.4567	0.0142578	0.0394	89.68
2.4069	6.48182	3.4567	0.162559	3.4567	0.0129186	0.0394	91.58
2.7531	5.64545	3.7817	0.533904	3.7817	0.0202123	0.0394	91.1
2.7531	5.31818	3.7817	0.538118	3.7817	0.0189691	0.0572	89.61
3.1097	5.39091	4.1256	0.169328	4.1256	0.0202123	0.0572	92.02
3.1097	5.46364	4.1256	0.157738	4.1256	0.0189691	0.0572	91.29
3.4567	5.97273	4.4836	0.137718	4.4836	0.023942	0.0739	89.76
3.4567	6.33636	4.4836	0.139825	4.4836	0.0177258	0.0739	91.51
3.7817	6.29773	4.8667	0.295771	4.8667	0.0115096	0.0739	91.43
3.7817	6.84318	4.8667	0.254677	4.8667	0.0152393	0.0906	89.73
4.1256	7.13409	5.1833	0.270482	5.1833	0.0127529	0.0906	91.89
4.1256	6.66136	5.1833	0.274697	5.1833	0.0152393	0.0906	91.38
4.4836	8.84318	5.5056	0.310143	5.5056	0.0158211	0.1072	89.69
4.4836	8.00682	5.8308	0.175069	5.8308	0.000941822	0.1072	91.91
4.8667	7.425	5.8308	0.28869	5.8308	0.0591061	0.1072	91.15
4.8667	7.53409	6.1489	0.180631	6.1489	0.0212317	0.1239	89.7
5.1833	7.64318	6.4694	0.19096	6.4694	0.0158211	0.1239	90.58
5.1833	7.46136	6.4694	0.296635	6.8183	0.0293476	0.1239	91.35
5.5056	7.42727	6.8183	0.168713	7.1431	0.00203608	0.1406	89.99
5.5056	9.17273	7.1431	0.22599	7.1431	0.0261757	0.1406	91.09
5.8308	7.75455	8.1381	0.0965822	7.4639	0.00457709	0.1406	91.44
6.4694	9.28182	8.1381	0.319404	7.7864	0.00076558	0.1572	89.81
6.8183	9.17273	8.4594	0.413674	8.1381	0.0249051	0.1572	91.28
6.8183	9.57273	8.4594	0.461667	8.4594	0.0236346	0.1572	91.47
7.1431	9.75227	12.9364	0.55855	12.9364	0.00874392	0.1739	89.88
7.4639	10.4795	12.9711	0.529345	12.9364	3.33653	0.1739	91.8
7.7864	11.025	13.0061	0.423692	12.9711	0.00747716	0.1739	91.85
7.7864	10.5159			12.9711	0.0062104	0.1906	89.78
8.1381	10.7341			13.0061	0.00747716	0.1906	92.1
8.4594	11.8977			13.0061	0.00747716	0.1906	91.27
12.9364	13.1023					0.2072	89.56
12.9711	9.89015					0.2072	91.4
13.0061	12.072					0.2072	90.38
13.0061	14.3144					0.2239	89.87
						0.2239	91.37
						0.2239	91.46
						0.2406	89.91
						0.2406	91.67
						0.2406	91.45
						0.2572	90
						0.2572	91.79
						0.2572	91.49
						0.2739	90.07
						0.2739	91.69
						0.2739	91.96
						0.2906	89.94
						0.2906	92.07
						0.2906	91.64
						0.3072	89.64
						0.3072	91.78
						0.3072	91.22
						0.3239	85.39
						0.3239	90.19
						0.3239	91.33
						0.3406	67.94
						0.3406	75
						0.3406	73.73
						0.3572	63.94
						0.3572	70.3
						0.3572	69.35
						0.3739	62.89
						0.3739	69.09
						0.3739	67.96
						0.3906	61.48
						0.3906	68.88
						0.3906	67.65
						0.4072	61.05
						0.4072	67.22
						0.4072	67.06
						0.4239	60.26
						0.4239	66.58
						0.4239	66.43
						0.4406	59.63
						0.4406	66.35
						0.4406	65.24
						0.4572	59.65
						0.4572	65.21
						0.4572	65.63
						0.4739	59.84
						0.4739	65.38
						0.4739	65.51
						0.4906	59.59
						0.4906	65.14
						0.4906	65.77
						0.5072	59.43
						0.5072	65.21
						0.5072	64.52
						0.5239	58.64
						0.5239	64.58
						0.5239	65.05
						0.5406	58.39
						0.5406	64.63
						0.5406	64.62
						0.5572	58.95
						0.5572	64.52
						0.5572	64.5
						0.5739	58.77
						0.5739	64.14
						0.5739	64.59
						0.5906	58.46
						0.5906	64
						0.5906	64.55
						0.6072	58.55
						0.6072	63.56
						0.6072	64.44
						0.6239	58.41
						0.6239	64.17
						0.6239	64.57
						0.6406	58.85
						0.6406	64.33
						0.6406	64.18
						0.6572	59.1
						0.6572	64.39
						0.6572	64.6
						0.6739	59.45
						0.6739	64.59
						0.6739	64.68
						0.6906	60
						0.6906	65.05
						0.6906	64.74
						0.7072	60.41
						0.7072	65.27
						0.7072	65.28
						0.7239	60.67
						0.7239	65.65
						0.7239	64.89
						0.7406	61.27
						0.7406	65.65
						0.7406	65.4
						0.7572	60.97
						0.7572	66.2
						0.7572	65.41
						0.7739	62.04
						0.7739	65.91
						0.7739	65.25
						0.7906	61.83
						0.7906	66.19
						0.7906	65.68
						0.8072	62.06
						0.8072	66.05
						0.8072	65.86
						0.8239	61.93
						0.8239	65.82
						0.8239	65.49
						0.8406	61.62
						0.8406	65.56
						0.8406	65.1
						0.8572	61.02
						0.8572	65.17
						0.8572	64.79
						0.8739	60.8
						0.8739	64.43
						0.8739	64.15
						0.8906	59.89
						0.8906	63.83
						0.8906	64.1
						0.9072	60
						0.9072	62.94
						0.9072	63.39
						0.9239	59.15
						0.9239	62.56
						0.9239	62.55
						0.9406	58.33
						0.9406	62.4
						0.9406	61.24
						0.9572	57.7
						0.9572	61.07
						0.9572	60.71
						0.9739	56.66
						0.9739	61.02
						0.9739	60.36
						0.9906	56.73
						0.9906	60.32
						0.9906	60.29
						1.0072	56.2
						1.0072	59.85
						1.0072	59.69
						1.0239	55.49
						1.0239	58.99
						1.0239	59.31
						1.0406	54.42
						1.0406	59.12
						1.0406	58.34
						1.0572	53.93
						1.0572	58.8
						1.0572	58.54
						1.0739	53.11
						1.0739	58.4
						1.0739	58.64
						1.0906	53.21
						1.0906	58.64
						1.0906	57.87
						1.1072	52.96
						1.1072	58.02
						1.1072	57.93
						1.1239	52.22
						1.1239	57.7
						1.1239	56.85
						1.1406	51.49
						1.1406	57.68
						1.1406	56.99
						1.1572	52.34
						1.1572	57.5
						1.1572	56.8
						1.1739	53.05
						1.1739	57.31
						1.1739	56.42
						1.1906	72.17
						1.1906	56.94
						1.1906	56.56
						1.2072	76.74
						1.2072	57.14
						1.2072	56.8
						1.2239	77.91
						1.2239	69.46
						1.2239	67.69
						1.2406	79.31
						1.2406	77.92
						1.2406	78.14
						1.2572	81.02
						1.2572	79.06
						1.2572	79.89
						1.2739	83.06
						1.2739	80.36
						1.2739	80.55
						1.2906	83.89
						1.2906	82.46
						1.2906	83.05
						1.3072	84.29
						1.3072	84.22
						1.3072	84.41
						1.3239	84.61
						1.3239	84.69
						1.3239	84.97
						1.3406	84.9
						1.3406	85.16
						1.3406	85.08
						1.3572	84.91
						1.3572	85.16
						1.3572	86.05
						1.3739	84.9
						1.3739	86.23
						1.3739	85.75
						1.3906	84.65
						1.3906	86.22
						1.3906	86.1
						1.4072	85.09
						1.4072	86.29
						1.4072	86.06
						1.4239	78.38
						1.4239	83.27
						1.4239	85.34
						1.4406	55.36
						1.4406	59.19
						1.4406	61.46
						1.4572	49.81
						1.4572	53.79
						1.4572	55.01
						1.4739	48.71
						1.4739	52.52
						1.4739	52.04
						1.4906	47.25
						1.4906	52.17
						1.4906	52.17
						1.5072	46.36
						1.5072	51.48
						1.5072	50.09
						1.5239	46.31
						1.5239	49.63
						1.5239	50.14
						1.5406	46.3
						1.5406	50.2
						1.5406	50.25
						1.5572	45.38
						1.5572	49.96
						1.5572	49.47
						1.5739	45.3
						1.5739	50.2
						1.5739	49.89
						1.5906	45.48
						1.5906	50.05
						1.5906	50.46
						1.6072	46.07
						1.6072	50.03
						1.6072	49.87
						1.6239	45.85
						1.6239	49.45
						1.6239	49.66
						1.6406	45.04
						1.6406	50.5
						1.6406	49.2
						1.6572	45.78
						1.6572	50.37
						1.6572	49.79
						1.6739	45.46
						1.6739	50.16
						1.6739	50.24
						1.6906	47.2
						1.6906	49.44
						1.6906	50.32
						1.7072	46.21
						1.7072	50.31
						1.7072	50.33
						1.7239	46.85
						1.7239	50.6
						1.7239	50.36
						1.7406	47.44
						1.7406	50.15
						1.7406	49.51
						1.7572	48.19
						1.7572	50.46
						1.7572	51.4
						1.7739	48.12
						1.7739	51.16
						1.7739	50.49
						1.7906	47.62
						1.7906	50.67
						1.7906	50.76
						1.8072	48.02
						1.8072	51.06
						1.8072	50.24
						1.8239	48.65
						1.8239	50.13
						1.8239	49.89
						1.8406	46.62
						1.8406	49.7
						1.8406	49.57
						1.8572	45.94
						1.8572	49.55
						1.8572	49.24
						1.8739	45.95
						1.8739	49.18
						1.8739	48.69
						1.8906	44.74
						1.8906	48.29
						1.8906	47.2
						1.9072	44.21
						1.9072	47.2
						1.9072	46.18
						1.9239	42.9
						1.9239	45.99
						1.9239	45.21
						1.9406	41.59
						1.9406	45.69
						1.9406	44.52
						1.9572	41.11
						1.9572	45.05
						1.9572	44.21
						1.9739	48.08
						1.9739	43.76
						1.9739	42.52
						1.9906	70.07
						1.9906	42.76
						1.9906	42.17
						2.0072	74.93
						2.0072	42.43
						2.0072	54.6
						2.0239	75.28
						2.0239	66.39
						2.0239	71.18
						2.0406	77.59
						2.0406	73.05
						2.0406	73.91
						2.0572	79.68
						2.0572	73.25
						2.0572	74.17
						2.0739	81.12
						2.0739	74.47
						2.0739	75.89
						2.0906	81.89
						2.0906	76.73
						2.0906	77.46
						2.1072	82.47
						2.1072	78.93
						2.1072	79.71
						2.1239	82.92
						2.1239	80.61
						2.1239	80.51
						2.1406	82.76
						2.1406	81.14
						2.1406	82.11
						2.1572	82.99
						2.1572	81.7
						2.1572	82.28
						2.1739	83.11
						2.1739	81.39
						2.1739	82.67
						2.1906	83.22
						2.1906	82.02
						2.1906	82.73
						2.2072	83.3
						2.2072	82.24
						2.2072	82.91
						2.2239	83.76
						2.2239	82.02
						2.2239	83.11
						2.2406	83.79
						2.2406	82.3
						2.2406	83.19
						2.2572	83.8
						2.2572	82.41
						2.2572	83.5
						2.2739	84.02
						2.2739	82.07
						2.2739	83.25
						2.2906	84.08
						2.2906	82.24
						2.2906	83.63
						2.3072	84.09
						2.3072	81.88
						2.3072	83.23
						2.3239	84.04
						2.3239	82.02
						2.3239	83.62
						2.3406	83.97
						2.3406	81.79
						2.3406	83.57
						2.3572	83.96
						2.3572	82.18
						2.3572	83.94
						2.3739	83.88
						2.3739	85.88
						2.3739	83.96
						2.3906	83.23
						2.3906	86.99
						2.3906	83.58
						2.4072	83.87
						2.4072	87.14
						2.4072	83.87
						2.4239	84
						2.4239	87.26
						2.4239	83.56
						2.4406	83.64
						2.4406	87.61
						2.4406	82.99
						2.4572	83.52
						2.4572	87.69
						2.4572	82.56
						2.4739	83.25
						2.4739	88.22
						2.4739	82.22
						2.4906	83.2
						2.4906	88.62
						2.4906	83.93
						2.5072	82.97
						2.5072	88.69
						2.5072	87.19
						2.5239	83.36
						2.5239	88.64
						2.5239	87.39
						2.5406	82.84
						2.5406	89
						2.5406	87.92
						2.5572	82.77
						2.5572	89.26
						2.5572	88.17
						2.5739	82.62
						2.5739	89.46
						2.5739	88.29
						2.5906	82.28
						2.5906	89.75
						2.5906	88.31
						2.6072	82.16
						2.6072	89.77
						2.6072	88.99
						2.6239	85.15
						2.6239	89.88
						2.6239	88.99
						2.6406	87.2
						2.6406	89.6
						2.6406	89.31
						2.6572	87.62
						2.6572	89.76
						2.6572	89.59
						2.6739	88.08
						2.6739	90.01
						2.6739	89.46
						2.6906	88.14
						2.6906	90.34
						2.6906	89.59
						2.7072	88.51
						2.7072	90.09
						2.7072	90.24
						2.7239	57.11
						2.7239	62.53
						2.7239	65.34
						2.7406	46.32
						2.7406	47.72
						2.7406	51.46
						2.7572	73.72
						2.7572	73.76
						2.7572	66.99
						2.7739	80.52
						2.7739	81.31
						2.7739	80.84
						2.7906	82.84
						2.7906	83.62
						2.7906	82.62
						2.8072	85.14
						2.8072	86.27
						2.8072	84.84
						2.8239	68.97
						2.8239	71.95
						2.8239	77.24
						2.8406	42.27
						2.8406	43.1
						2.8406	44.61
						2.8572	54.85
						2.8572	57.04
						2.8572	48.82
						2.8739	76.16
						2.8739	77.09
						2.8739	75.57
						2.8906	78.06
						2.8906	77.91
						2.8906	77.97
						2.9072	79.91
						2.9072	81.94
						2.9072	78.29
						2.9239	83.81
						2.9239	84.47
						2.9239	83.74
						2.9406	85.05
						2.9406	86.31
						2.9406	85.5
						2.9572	54.52
						2.9572	56.15
						2.9572	60.96
						2.9739	40.67
						2.9739	39.89
						2.9739	44.33
						2.9906	60.15
						2.9906	56.46
						2.9906	59.94
						3.0072	74.52
						3.0072	74.94
						3.0072	76.89
						3.0239	74.53
						3.0239	75.27
						3.0239	77.33
						3.0406	77.19
						3.0406	76.95
						3.0406	77.62
						3.0572	80.97
						3.0572	82.49
						3.0572	83.12
						3.0739	56.74
						3.0739	59.46
						3.0739	66.41
						3.0906	38.89
						3.0906	40.38
						3.0906	43.86
						3.1072	51.36
						3.1072	43.37
						3.1072	42.09
						3.1239	72
						3.1239	71.22
						3.1239	72.15
						3.1406	72.48
						3.1406	75.05
						3.1406	77.02
						3.1572	72.29
						3.1572	74.01
						3.1572	76.17
						3.1739	80.25
						3.1739	80.72
						3.1739	80.41
						3.1906	47.43
						3.1906	46.35
						3.1906	54.27
						3.2072	36.1
						3.2072	29.85
						3.2072	40.06
						3.2239	62.31
						3.2239	31.65
						3.2239	59.74
						3.2406	72.81
						3.2406	40.36
						3.2406	73.95
						3.2572	70.93
						3.2572	33.92
						3.2572	75.29
						3.2739	76.84
						3.2739	29.85
						3.2739	78.14
						3.2906	78.82
						3.2906	31.03
						3.2906	82.53
						3.3072	68.45
						3.3072	23.84
						3.3072	81.05
						3.3239	39.13
						3.3239	2.88
						3.3239	46.04
						3.3406	37.13
						3.3406	1.88
						3.3406	38.16
						3.3572	67.78
						3.3572	1.42
						3.3572	69.49
						3.3739	70.55
						3.3739	1.16
						3.3739	74.93
						3.3906	72.69
						3.3906	0.97
						3.3906	74.93
						3.4072	78.64
						3.4072	0.8
						3.4072	81.53
						3.4239	57.52
						3.4239	0.68
						3.4239	68.09
						3.4406	36.61
						3.4406	0.57
						3.4406	41.38
						3.4572	37.56
						3.4572	0.51
						3.4572	33.24
						3.4739	67.34
						3.4739	0.38
						3.4739	68.81
						3.4906	69.22
						3.4906	0.32
						3.4906	73.36
						3.5072	71.66
						3.5072	0.27
						3.5072	73.36
						3.5239	70.53
						3.5239	0.21
						3.5239	80.64
						3.5406	38.24
						3.5406	0.15
						3.5406	45.13
						3.5572	30.46
						3.5572	0.1
						3.5572	34.63
						3.5739	61.31
						3.5739	0.09
						3.5739	59.21
						3.5906	67.45
						3.5906	0.05
						3.5906	71.59
						3.6072	64.3
						3.6072	0.02
						3.6072	71.48
						3.6239	72.11
						3.6239	0
						3.6239	76.59
						3.6406	53.67
						3.6406	0
						3.6406	67.78
						3.6572	32.08
						3.6572	0
						3.6572	38.88
						3.6739	27.94
						3.6739	1.9
						3.6739	41.96
						3.6906	62.53
						3.6906	2.42
						3.6906	69.05
						3.7072	66.39
						3.7072	10.14
						3.7072	72.42
						3.7239	64.84
						3.7239	21.84
						3.7239	72.75
						3.7406	59.05
						3.7406	35.91
						3.7406	71.85
						3.7572	34.5
						3.7572	21.99
						3.7572	38.79
						3.7739	28.51
						3.7739	27.26
						3.7739	31.71
						3.7906	57.34
						3.7906	34.66
						3.7906	43.25
						3.8072	65.83
						3.8072	48.75
						3.8072	68.3
						3.8239	65.24
						3.8239	56.2
						3.8239	69.3
						3.8406	74.25
						3.8406	54.94
						3.8406	69.04
						3.8572	37.51
						3.8572	48.74
						3.8572	42.27
						3.8739	28.82
						3.8739	46.56
						3.8739	31.19
						3.8906	39.44
						3.8906	43.78
						3.8906	50.8
						3.9072	64.87
						3.9072	33.93
						3.9072	68.73
						3.9239	61.68
						3.9239	39.13
						3.9239	68.48
						3.9406	63.47
						3.9406	58.47
						3.9406	70.91
						3.9572	64.87
						3.9572	59.24
						3.9572	77.37
						3.9739	33.15
						3.9739	36.65
						3.9739	40.68
						3.9906	27.94
						3.9906	26.65
						3.9906	30.56
						4.0072	52.58
						4.0072	21.05
						4.0072	38.13
						4.0239	63.72
						4.0239	42.88
						4.0239	65.62
						4.0406	61.48
						4.0406	62.4
						4.0406	66.65
						4.0572	71.31
						4.0572	67.99
						4.0572	66.7
						4.0739	75.94
						4.0739	71.7
						4.0739	76.4
						4.0906	58.44
						4.0906	58.51
						4.0906	69.85
						4.1072	32.17
						4.1072	28.67
						4.1072	34.66
						4.1239	46.45
						4.1239	21.69
						4.1239	25.11
						4.1406	65.84
						4.1406	56.81
						4.1406	59.54
						4.1572	67.53
						4.1572	69.84
						4.1572	66.34
						4.1739	75.64
						4.1739	72.25
						4.1739	67.67
						4.1906	77.76
						4.1906	71.38
						4.1906	74.6
						4.2072	40.37
						4.2072	40.86
						4.2072	49.26
						4.2239	28.16
						4.2239	20.88
						4.2239	28.83
						4.2406	61.47
						4.2406	46.43
						4.2406	44.03
						4.2572	65.6
						4.2572	68.64
						4.2572	66.64
						4.2739	74.63
						4.2739	70.41
						4.2739	65.41
						4.2906	76.2
						4.2906	70.76
						4.2906	74.13
						4.3072	77.59
						4.3072	71.35
						4.3072	77.7
						4.3239	79.66
						4.3239	71.97
						4.3239	79.42
						4.3406	35.44
						4.3406	32.01
						4.3406	39.52
						4.3572	26.32
						4.3572	18.14
						4.3572	28.01
						4.3739	61.66
						4.3739	25.28
						4.3739	45.49
						4.3906	63.28
						4.3906	35.3
						4.3906	63.96
						4.4072	72.77
						4.4072	30.27
						4.4072	64.51
						4.4239	75.27
						4.4239	24.67
						4.4239	68.35
						4.4406	77.5
						4.4406	19.38
						4.4406	75.48
						4.4572	34.81
						4.4572	2.21
						4.4572	39.81
						4.5056	25.62
						4.5056	12.35
						4.5056	27.45
						4.5136	64.86
						4.5136	57.55
						4.5136	62.65
						4.5303	73.15
						4.5303	68.34
						4.5303	65.43
						4.5469	75.21
						4.5469	67.43
						4.5469	73.81
						4.5636	77.42
						4.5636	68.18
						4.5636	77.71
						4.5803	47.15
						4.5803	46.08
						4.5803	58.59
						4.5969	28.73
						4.5969	19.51
						4.5969	30.67
						4.6136	39.96
						4.6136	24.61
						4.6136	24.34
						4.6303	63.89
						4.6303	61.71
						4.6303	60.12
						4.6469	70.02
						4.6469	68.2
						4.6469	61.83
						4.6636	74.06
						4.6636	68.17
						4.6636	70.37
						4.6803	75.17
						4.6803	69.39
						4.6803	75.5
						4.6969	77.76
						4.6969	69.66
						4.6969	77.94
						4.7136	79.39
						4.7136	76.72
						4.7136	79.83
						4.7303	40.02
						4.7303	42.57
						4.7303	50.54
						4.7469	27.24
						4.7469	23.2
						4.7469	30.33
						4.7636	46.48
						4.7636	34.53
						4.7636	23.79
						4.7803	56.21
						4.7803	64.32
						4.7803	54.84
						4.7969	63.54
						4.7969	64.69
						4.7969	26.68
						4.8136	65.75
						4.8136	62
						4.8136	64.95
						4.8303	48.98
						4.8303	60.49
						4.8303	69.01
						4.8469	7.68
						4.8469	6.63
						4.8469	14.49
						4.8636	4.68
						4.8636	3.99
						4.8636	7.94
						4.8803	40.91
						4.8803	27.27
						4.8803	40.53
						4.8969	47.17
						4.8969	54.92
						4.8969	54.36
						4.9136	46.14
						4.9136	55.79
						4.9136	57.55
						4.9303	51.12
						4.9303	53.28
						4.9303	69.6
						4.9469	5.31
						4.9469	6.4
						4.9469	15.8
						4.9636	3.31
						4.9636	3.64
						4.9636	6.86
						4.9803	39.53
						4.9803	26.35
						4.9803	27.71
						4.9969	47.65
						4.9969	54.74
						4.9969	54.04
						5.0136	42.93
						5.0136	56.61
						5.0136	50.48
						5.0303	64.37
						5.0303	57.22
						5.0303	67.36
						5.0469	30.01
						5.0469	38.26
						5.0469	46.88
						5.0636	4.91
						5.0636	6.32
						5.0636	11.92
						5.0803	3.08
						5.0803	4.66
						5.0803	6.85
						5.0969	45.12
						5.0969	36.14
						5.0969	28.24
						5.1136	46.12
						5.1136	54.98
						5.1136	52.22
						5.1303	48.43
						5.1303	56.3
						5.1303	50.57
						5.1469	47.29
						5.1469	52.04
						5.1469	65.55
						5.1636	5.42
						5.1636	7.6
						5.1636	13.36
						5.1803	3.28
						5.1803	5.23
						5.1803	7.01
						5.1969	34.56
						5.1969	18.52
						5.1969	7.55
						5.2136	47.34
						5.2136	52.35
						5.2136	49.66
						5.2303	43.23
						5.2303	55.73
						5.2303	53.99
						5.2469	63.58
						5.2469	56.56
						5.2469	54.74
						5.2636	8.22
						5.2636	13.74
						5.2636	23.72
						5.2803	4.05
						5.2803	4.83
						5.2803	10.88
						5.2969	9.08
						5.2969	4.62
						5.2969	7.5
						5.3136	47.4
						5.3136	38.81
						5.3136	41.44
						5.3303	45.63
						5.3303	51.63
						5.3303	53.83
						5.3469	53.22
						5.3469	54.43
						5.3469	52.18
						5.3636	52.83
						5.3636	51.67
						5.3636	68.72
						5.3803	5.53
						5.3803	7.68
						5.3803	14.68
						5.3969	2.86
						5.3969	4.63
						5.3969	9.09
						5.4136	16.17
						5.4136	3.2
						5.4136	7.3
						5.4303	47.86
						5.4303	39.07
						5.4303	44.42
						5.4469	44.02
						5.4469	51.32
						5.4469	52.75
						5.4636	54.86
						5.4636	53.54
						5.4636	51.89
						5.4803	6.74
						5.4803	9.53
						5.4803	19.51
						5.4969	3.29
						5.4969	4.45
						5.4969	8.53
						5.5136	1.55
						5.5136	3.65
						5.5136	5.57
						5.5303	26.8
						5.5303	22.47
						5.5303	30.63
						5.5469	45.39
						5.5469	46.67
						5.5469	50.55
						5.5636	45.06
						5.5636	50.74
						5.5636	49.96
						5.5803	6.12
						5.5803	8.13
						5.5803	18.65
						5.5969	2.73
						5.5969	3.47
						5.5969	8.17
						5.6136	1.33
						5.6136	2.67
						5.6136	4.37
						5.6303	31.42
						5.6303	8.97
						5.6303	27.22
						5.6469	45.35
						5.6469	17.96
						5.6469	50.77
						5.6636	42.67
						5.6636	16.13
						5.6636	48.94
						5.6803	61.57
						5.6803	21.6
						5.6803	63.44
						5.6969	8.52
						5.6969	6.86
						5.6969	19.97
						5.7136	2.78
						5.7136	1.2
						5.7136	4.99
						5.7303	1.44
						5.7303	1.78
						5.7303	3.34
						5.7469	31.47
						5.7469	8.06
						5.7469	24.88
						5.7636	40.06
						5.7636	30.06
						5.7636	45.25
						5.7803	37.64
						5.7803	46.57
						5.7803	45.95
						5.7969	20.2
						5.7969	28.88
						5.7969	45.25
						5.8136	2.36
						5.8136	2.18
						5.8136	6.1
						5.8303	1.5
						5.8303	1
						5.8303	4.94
						5.8469	9.7
						5.8469	1.65
						5.8469	5.98
						5.8636	37.62
						5.8636	15.81
						5.8636	40.18
						5.8803	39.46
						5.8803	35.42
						5.8803	44.62
						5.8969	23.25
						5.8969	28.78
						5.8969	47.47
						5.9136	2.12
						5.9136	2.35
						5.9136	5.53
						5.9303	1.25
						5.9303	2.22
						5.9303	4.62
						5.9469	13.7
						5.9469	4.51
						5.9469	6.83
						5.9636	32.56
						5.9636	23.25
						5.9636	39.5
						5.9803	35.51
						5.9803	43.93
						5.9803	43.17
						5.9969	54.45
						5.9969	51.22
						5.9969	61.88
						6.0136	10.31
						6.0136	18.19
						6.0136	30.09
						6.0303	2.2
						6.0303	2.6
						6.0303	5.31
						6.0469	1.26
						6.0469	1.95
						6.0469	4.03
						6.0636	22.22
						6.0636	10.98
						6.0636	13.86
						6.0803	29.41
						6.0803	34.05
						6.0803	42.16
						6.0969	40.85
						6.0969	44.2
						6.0969	43.54
						6.1136	22.56
						6.1136	36.6
						6.1136	47.92
						6.1303	2.15
						6.1303	2.97
						6.1303	5.19
						6.1469	1.2
						6.1469	2.49
						6.1469	4.32
						6.1636	4.94
						6.1636	9.75
						6.1636	5.22
						6.1803	24.3
						6.1803	30.48
						6.1803	38.12
						6.1969	30.28
						6.1969	43.23
						6.1969	45.68
						6.2136	32.92
						6.2136	45.72
						6.2136	55.96
						6.2303	1.86
						6.2303	3.18
						6.2303	5.12
						6.2469	0.82
						6.2469	2.21
						6.2469	3.59
						6.2636	1.51
						6.2636	10.47
						6.2636	9.04
						6.2803	27.51
						6.2803	29.91
						6.2803	36.58
						6.2969	48.04
						6.2969	48.89
						6.2969	52.72
						6.3136	55.16
						6.3136	57.86
						6.3136	60.05
						6.3303	12.95
						6.3303	24.09
						6.3303	34.25
						6.3469	1.9
						6.3469	2.82
						6.3469	4.05
						6.3636	0.94
						6.3636	2.09
						6.3636	3.96
						6.3803	0.54
						6.3803	7.75
						6.3803	8.99
						6.3969	0.37
						6.3969	27.52
						6.3969	37.75
						6.4136	18.85
						6.4136	50.03
						6.4136	54.78
						6.4303	45.1
						6.4303	57.27
						6.4303	58.4
						6.4469	2.84
						6.4469	3.88
						6.4469	9.93
						6.4636	0.69
						6.4636	2.27
						6.4636	3.43
						6.4803	2.35
						6.4803	4.8
						6.4803	2.17
						6.4969	6.79
						6.4969	17.13
						6.4969	24.6
						6.5136	10.5
						6.5136	45.98
						6.5136	51.59
						6.5303	49.99
						6.5303	54.12
						6.5303	56.11
						6.5469	14.2
						6.5469	24.97
						6.5469	36.08
						6.5636	1.45
						6.5636	2.8
						6.5636	7.52
						6.5803	0.64
						6.5803	1.22
						6.5803	4.04
						6.5969	1.16
						6.5969	5.63
						6.5969	7.01
						6.6136	0.47
						6.6136	16.98
						6.6136	36.99
						6.6303	0.44
						6.6303	47.88
						6.6303	54.35
						6.6469	47.64
						6.6469	52.84
						6.6469	57.73
						6.6636	6.11
						6.6636	12.38
						6.6636	19.87
						6.6803	3.58
						6.6803	2.1
						6.6803	3.72
						6.6969	2.4
						6.6969	1.02
						6.6969	3.15
						6.7136	1.07
						6.7136	2.17
						6.7136	19.73
						6.7303	27.05
						6.7303	24.13
						6.7303	46.88
						6.7469	41.05
						6.7469	49.73
						6.7469	57.54
						6.7636	19.56
						6.7636	32.5
						6.7636	44.67
						6.7803	1.49
						6.7803	2.49
						6.7803	3.53
						6.7969	0.63
						6.7969	1.24
						6.7969	7
						6.8136	6.84
						6.8136	6
						6.8136	5.84
						6.8303	0.76
						6.8303	16
						6.8303	1.6
						6.8469	31.7
						6.8469	44.08
						6.8469	35.14
						6.8636	51.25
						6.8636	54.35
						6.8636	54.7
						6.8803	51.61
						6.8803	57.92
						6.8803	59.7
						6.8969	5.03
						6.8969	8.5
						6.8969	14.17
						6.9136	1.18
						6.9136	2.16
						6.9136	2.67
						6.9303	0.53
						6.9303	1.68
						6.9303	2.29
						6.9469	4.37
						6.9469	17.83
						6.9469	6.87
						6.9636	23.18
						6.9636	41.97
						6.9636	35.82
						6.9803	38.08
						6.9803	53.17
						6.9803	54.74
						6.9969	49.69
						6.9969	58.52
						6.9969	60.97
						7.0136	2.4
						7.0136	6.1
						7.0136	6.51
						7.0303	0.77
						7.0303	1.7
						7.0303	2.06
						7.0469	0.77
						7.0469	0.94
						7.0469	1.18
						7.0636	3.97
						7.0636	15.29
						7.0636	29.03
						7.0803	22.96
						7.0803	38.86
						7.0803	39.11
						7.0969	41.62
						7.0969	51.58
						7.0969	56.78
						7.1136	3.68
						7.1136	9.08
						7.1136	15.64
						7.1303	0.65
						7.1303	1.69
						7.1303	2.11
						7.1469	0.24
						7.1469	0.86
						7.1469	1.2
						7.1636	16.37
						7.1636	1.24
						7.1636	17.07
						7.1803	37.11
						7.1803	28.25
						7.1803	39.56
						7.1969	24.62
						7.1969	48.64
						7.1969	53.07
						7.2136	3.36
						7.2136	13.51
						7.2136	22.93
						7.2303	0.75
						7.2303	1.71
						7.2303	2.19
						7.2469	0.28
						7.2469	0.81
						7.2469	1.14
						7.2636	0.04
						7.2636	12.76
						7.2636	14.96
						7.2803	4.46
						7.2803	38.58
						7.2803	38.03
						7.2969	24.88
						7.2969	50.25
						7.2969	53.43
						7.3136	30.94
						7.3136	58.84
						7.3136	60.7
						7.3303	2.7
						7.3303	8.25
						7.3303	14.76
						7.3469	0.54
						7.3469	1.81
						7.3469	2.05
						7.3636	0.12
						7.3636	1
						7.3636	1.11
						7.3803	9.36
						7.3803	19.75
						7.3803	23.43
						7.3969	34.9
						7.3969	39.57
						7.3969	38.56
						7.4136	34.4
						7.4136	51.28
						7.4136	52.67
						7.4303	9.29
						7.4303	23.56
						7.4303	34.17
						7.4469	1.05
						7.4469	2.11
						7.4469	2.35
						7.4636	0.36
						7.4636	0.96
						7.4636	1.12
						7.4803	0.07
						7.4803	0.55
						7.4803	6.54
						7.4969	15.65
						7.4969	0.38
						7.4969	29.86
						7.5136	23.38
						7.5136	6.24
						7.5136	34.79
						7.5303	20.21
						7.5303	12.07
						7.5303	52.78
						7.5469	0.75
						7.5469	0.57
						7.5469	2.46
						7.5636	0.15
						7.5636	0.18
						7.5636	0.92
						7.5803	0.22
						7.5803	0.02
						7.5803	5.65
						7.5969	27.98
						7.5969	3.85
						7.5969	33.05
						7.6136	33.07
						7.6136	16.8
						7.6136	44.32
						7.6303	34.29
						7.6303	43.59
						7.6303	57.76
						7.6469	7.85
						7.6469	22.91
						7.6469	33.85
						7.6636	0.85
						7.6636	1.78
						7.6636	2.3
						7.6803	0.27
						7.6803	0.6
						7.6803	1.02
						7.6969	3.5
						7.6969	4.75
						7.6969	15.13
						7.7136	10.06
						7.7136	28.15
						7.7136	35.89
						7.7303	33.11
						7.7303	44.32
						7.7303	50.61
						7.7469	32.8
						7.7469	43.95
						7.7469	59.93
						7.7636	1.08
						7.7636	2.15
						7.7636	3.16
						7.7803	0.25
						7.7803	0.82
						7.7803	1.16
						7.7969	0.65
						7.7969	5.42
						7.7969	2.69
						7.8136	22.49
						7.8136	21.54
						7.8136	23.21
						7.8303	18.06
						7.8303	38.03
						7.8303	41.76
						7.8469	34.45
						7.8469	51.25
						7.8469	56.81
						7.8636	45.33
						7.8636	47.11
						7.8636	63.17
						7.8803	34.37
						7.8803	37.1
						7.8803	66.82
						7.8969	1.74
						7.8969	2.34
						7.8969	4.19
						7.9136	0.62
						7.9136	0.97
						7.9136	1.54
						7.9303	0.22
						7.9303	0.5
						7.9303	2.44
						7.9469	0
						7.9469	0.27
						7.9469	24.46
						7.9636	0
						7.9636	0.1
						7.9636	41.05
						7.9803	0
						7.9803	4.36
						7.9803	57.54
						7.9969	0
						7.9969	2.83
						7.9969	57.34
						8.0136	0
						8.0136	0.33
						8.0136	2.79
						8.0303	0
						8.0303	0
						8.0303	1.19
						8.0469	0
						8.0469	4.58
						8.0469	9.41
						8.0636	15
						8.0636	3.94
						8.0636	31.93
						8.0803	9.87
						8.0803	26.49
						8.0803	31.26
						8.0969	33.11
						8.0969	38.71
						8.0969	56.2
						8.1136	0.68
						8.1136	2.35
						8.1136	4.41
						8.1303	0
						8.1303	0.52
						8.1303	1.25
						8.1469	0
						8.1469	1.62
						8.1469	2.7
						8.1636	1.25
						8.1636	12.64
						8.1636	24.23
						8.1803	2.99
						8.1803	7.67
						8.1803	28.03
						8.1969	5.84
						8.1969	45.07
						8.1969	53.2
						8.2136	0
						8.2136	2.95
						8.2136	4.89
						8.2303	0
						8.2303	0.74
						8.2303	1.18
						8.2469	0
						8.2469	0.23
						8.2469	0.61
						8.2636	0
						8.2636	0
						8.2636	3.27
						8.2803	17.7
						8.2803	0
						8.2803	30.62
						8.2969	8.21
						8.2969	1.65
						8.2969	50.24
						8.3136	21.23
						8.3136	0
						8.3136	55.67
						8.3303	0.14
						8.3303	0
						8.3303	3.56
						8.3469	0
						8.3469	0
						8.3469	1.15
						8.3636	0
						8.3636	0
						8.3636	1.13
						8.3803	0
						8.3803	0
						8.3803	18.8
						8.3969	0
						8.3969	13.64
						8.3969	33.08
						8.4136	0
						8.4136	12.31
						8.4136	44.59
						8.4303	0
						8.4303	2.19
						8.4303	5.21
						8.4469	0
						8.4469	0.16
						8.4469	1.23
						8.4636	0
						8.4636	0
						8.4636	0.61
						8.4803	0
						8.4803	0
						8.4803	0.28
						8.4969	0.12
						8.4969	0
						8.4969	0.12
						8.5136	0
						8.5136	0
						8.5136	0.08
						8.5303	1.02
						8.5303	0.42
						8.5303	1.36
						8.5469	0
						8.5469	0
						8.5469	0
						8.5636	0
						8.5636	0
						8.5636	0
						8.5803	0
						8.5803	0
						8.5803	0
						8.7142	0
						8.7142	0
						8.7142	19.07
						8.7169	0
						8.7169	0
						8.7169	16.95
						8.7208	0
						8.7208	0
						8.7208	3.47
						8.7383	7.55
						8.7383	0
						8.7383	49.89
						8.7561	28.97
						8.7561	0
						8.7561	61.78
						8.7728	41.77
						8.7728	0
						8.7728	64.31
						8.7894	23.47
						8.7894	0
						8.7894	73.59
						8.8061	24.69
						8.8061	0
						8.8061	68.1
						8.8228	36.25
						8.8228	11.48
						8.8228	60.59
						8.8394	53.3
						8.8394	55.89
						8.8394	77.73
						8.8561	34.88
						8.8561	66.42
						8.8561	72.6
						8.8728	43.64
						8.8728	70.88
						8.8728	82.01
						8.8894	15.76
						8.8894	62.88
						8.8894	77.93
						8.9061	28.84
						8.9061	62.39
						8.9061	70.6
						8.9228	3.27
						8.9228	74.26
						8.9228	79.98
						8.9394	38.36
						8.9394	75.55
						8.9394	84.47
						8.9561	36.71
						8.9561	71.79
						8.9561	80.51
						8.9728	50.33
						8.9728	61.86
						8.9728	83.65
						8.9894	66.5
						8.9894	52.24
						8.9894	76.07
						9.0061	69.01
						9.0061	45.14
						9.0061	84.91
						9.0228	70.73
						9.0228	71.95
						9.0228	85.97
						9.0394	72.18
						9.0394	63.81
						9.0394	85.56
						9.0561	72.56
						9.0561	56
						9.0561	85.71
						9.0728	74.82
						9.0728	70
						9.0728	85.23
						9.0894	73.58
						9.0894	70.33
						9.0894	85.18
						9.1061	63.27
						9.1061	64.09
						9.1061	86.7
						9.1228	75.2
						9.1228	78.74
						9.1228	87.12
						9.1394	77.39
						9.1394	82.05
						9.1394	86.83
						9.1561	79
						9.1561	78.52
						9.1561	87.74
						9.1728	80.39
						9.1728	71.93
						9.1728	87.73
						9.1894	80.95
						9.1894	77.43
						9.1894	87.6
						9.2061	81.76
						9.2061	78.6
						9.2061	87.64
						9.2228	83.04
						9.2228	77.36
						9.2228	85.06
						9.2394	83.35
						9.2394	84.69
						9.2394	82.72
						9.2561	82.13
						9.2561	85.56
						9.2561	76.83
						9.2728	84.52
						9.2728	84.91
						9.2728	72.93
						9.2894	84.76
						9.2894	86.86
						9.2894	86.52
						9.3061	84.98
						9.3061	86.76
						9.3061	87.64
						9.3228	85.64
						9.3228	87.53
						9.3228	88.12
						9.3394	86.31
						9.3394	87.38
						9.3394	88.53
						9.3561	85.76
						9.3561	84.5
						9.3561	88.83
						9.3728	86.67
						9.3728	86.43
						9.3728	88.45
						9.3894	85.19
						9.3894	87.39
						9.3894	88.32
						9.4061	87.2
						9.4061	85.7
						9.4061	88.2
						9.4228	87.29
						9.4228	83.04
						9.4228	83.37
						9.4394	87.66
						9.4394	80.44
						9.4394	87.64
						9.4561	87.63
						9.4561	76.72
						9.4561	88.41
						9.4728	87.74
						9.4728	72.82
						9.4728	88.37
						9.4894	87.98
						9.4894	80.88
						9.4894	88.61
						9.5061	86
						9.5061	86.35
						9.5061	85.95
						9.5228	87.68
						9.5228	86.74
						9.5228	82.57
						9.5394	77.78
						9.5394	80.42
						9.5394	87.54
						9.5561	14.36
						9.5561	8.71
						9.5561	9.67
						9.5728	3.31
						9.5728	3.36
						9.5728	3.33
						9.5894	36.27
						9.5894	2.31
						9.5894	2.27
						9.6061	49.49
						9.6061	45.63
						9.6061	15.98
						9.6228	51.16
						9.6228	48.67
						9.6228	36.26
						9.6394	66.22
						9.6394	54.42
						9.6394	54.87
						9.6561	47.79
						9.6561	44.56
						9.6561	54
						9.6728	3.77
						9.6728	3.84
						9.6728	3.35
						9.6894	2.01
						9.6894	2.02
						9.6894	1.8
						9.7061	1.38
						9.7061	1.38
						9.7061	1.22
						9.7228	3.18
						9.7228	1.05
						9.7228	0.94
						9.7394	36.57
						9.7394	0.87
						9.7394	0.76
						9.7561	44.35
						9.7561	1.07
						9.7561	0.59
						9.7728	27.09
						9.7728	26.18
						9.7728	8.5
						9.7894	2.04
						9.7894	1.33
						9.7894	0.58
						9.8061	1.09
						9.8061	0.71
						9.8061	0.44
						9.8228	0.75
						9.8228	0.48
						9.8228	0.34
						9.8394	0.54
						9.8394	0.38
						9.8394	0.29
						9.8561	9.33
						9.8561	0.29
						9.8561	0.28
						9.8728	26.11
						9.8728	0.21
						9.8728	0.24
						9.8894	45.1
						9.8894	4.36
						9.8894	0.13
						9.9061	50.3
						9.9061	22.28
						9.9061	0.12
						9.9228	53.41
						9.9228	39.01
						9.9228	26.12
						9.9394	54.92
						9.9394	50.34
						9.9394	45.48
						9.9561	56.71
						9.9561	54.71
						9.9561	57.2
						9.9728	57.91
						9.9728	66.35
						9.9728	62.55
						9.9894	60.38
						9.9894	69.04
						9.9894	66.93
						10.0061	65.66
						10.0061	69.73
						10.0061	71.08
						10.0228	68.71
						10.0228	72.97
						10.0228	73.96
						10.0394	59.6
						10.0394	66.55
						10.0394	77.13
						10.0561	73.8
						10.0561	59.81
						10.0561	78.59
						10.0728	76.7
						10.0728	59.15
						10.0728	77.69
						10.0894	78.27
						10.0894	56.62
						10.0894	81.7
						10.1061	79.47
						10.1061	47.75
						10.1061	82.23
						10.1228	12.47
						10.1228	5.15
						10.1228	21.49
						10.1394	3.03
						10.1394	2.13
						10.1394	3.26
						10.1561	11.42
						10.1561	1.34
						10.1561	1.94
						10.1728	42.57
						10.1728	0.89
						10.1728	4.92
						10.1894	45.98
						10.1894	0.64
						10.1894	32.65
						10.2061	49.78
						10.2061	0.45
						10.2061	46.4
						10.2228	52.74
						10.2228	0.27
						10.2228	58
						10.2397	15.01
						10.2397	0.13
						10.2397	54.94
						10.2561	2.3
						10.2561	0.09
						10.2561	3.2
						10.2728	1.35
						10.2728	0.03
						10.2728	1.52
						10.2894	31.23
						10.2894	0
						10.2894	0.97
						10.3061	37.75
						10.3061	0
						10.3061	22.93
						10.3228	46.85
						10.3228	0
						10.3228	33.11
						10.3394	47.51
						10.3394	0
						10.3394	54.21
						10.3561	32.7
						10.3561	0
						10.3561	62.16
						10.3728	2.16
						10.3728	0
						10.3728	3.57
						10.3894	1.14
						10.3894	0
						10.3894	1.49
						10.4061	0.76
						10.4061	0
						10.4061	0.86
						10.4228	0.55
						10.4228	0
						10.4228	12.02
						10.4394	0.37
						10.4394	0
						10.4394	32.27
						10.4561	0.25
						10.4561	0
						10.4561	40.8
						10.4728	0.12
						10.4728	0
						10.4728	56.42
						10.4894	0.03
						10.4894	0
						10.4894	2.48
						10.5061	0
						10.5061	0
						10.5061	1.05
						10.5228	0
						10.5228	0
						10.5228	0.61
						10.5394	0
						10.5394	0
						10.5394	13.55
						10.5561	0
						10.5561	0
						10.5561	30.54
						10.5728	0
						10.5728	0
						10.5728	31.42
						10.5894	0
						10.5894	0
						10.5894	40.39
						10.6061	0
						10.6061	0
						10.6061	1.93
						10.6228	0
						10.6228	0
						10.6228	0.86
						10.6394	0
						10.6394	0
						10.6394	0.5
						10.6561	0
						10.6561	0
						10.6561	14.92
						10.6728	0
						10.6728	0
						10.6728	30.13
						10.6894	0
						10.6894	0
						10.6894	51.99
						10.7061	0
						10.7061	0
						10.7061	27.24
						10.7228	0
						10.7228	0
						10.7228	1.83
						10.7394	0
						10.7394	0
						10.7394	0.88
						10.7561	0
						10.7561	0
						10.7561	0.5
						10.7728	0
						10.7728	0
						10.7728	2.13
						10.7894	0
						10.7894	0
						10.7894	22.71
						10.8061	0
						10.8061	0
						10.8061	40.75
						10.8228	0
						10.8228	0
						10.8228	6.46
						10.8394	0
						10.8394	0
						10.8394	1.12
						10.8561	0
						10.8561	0
						10.8561	0.52
						10.8728	0
						10.8728	0
						10.8728	0.28
						10.8894	0
						10.8894	0
						10.8894	0.15
						10.9061	0
						10.9061	0
						10.9061	0.05
						10.9228	0
						10.9228	0
						10.9228	0
						10.9394	0
						10.9394	0
						10.9394	0.65
						10.9561	0
						10.9561	0
						10.9561	0.04
						10.9728	0
						10.9728	0
						10.9728	0
						10.9894	0
						10.9894	0
						10.9894	0
						11.0061	0
						11.0061	0
						11.0061	0
						11.0228	0
						11.0228	0
						11.0228	0
						11.0394	0
						11.0394	0
						11.0394	0
						11.0561	0
						11.0561	0
						11.0561	0
						11.0728	0
						11.0728	0
						11.0728	0
						11.0894	0
						11.0894	0
						11.0894	0
						11.1061	0
						11.1061	0
						11.1061	0
						11.1228	0
						11.1228	0.01
						11.1228	0
						11.1394	0
						11.1394	0
[truncated: 370 more rows]

## Sheet: Strain 4
Escherichia coli BW25113 ΔaceA
Biomass		Acetate		Glucose		DOT
Time [h]	Values [g/L]	Time [h]	Values [g/L]	Time [h]	Values [g/L]	Time [h]	Values [%]
0.0792	1.72955	0.5603	0.458285	0.5603	3.55618	0.0069	89.51
0.0792	1.71742	0.5603	0.470574	0.5603	3.85925	0.0069	89.84
0.1156	2.56591	0.8592	0.449777	0.8592	2.0499	0.0069	92.01
0.1156	2.54167	0.8592	0.461121	0.8592	1.8077	0.0097	89.42
0.1522	1.52348	1.1567	0.463957	1.1567	1.52795	0.0097	89.78
0.5603	1.89697	1.1567	0.470574	1.1567	1.84915	0.0097	91.76
0.5603	1.75152	1.4631	0.472465	1.4631	2.59905	0.0125	89.6
0.8592	2.91515	1.7622	0.494208	1.4631	4.35918	0.0125	89.9
0.8592	2.98788	1.7622	0.518786	1.7622	2.2118	0.0125	91.96
1.1567	2.11515	2.0658	0.489	1.7622	2.32707	0.0153	89.24
1.1567	2.18788	2.0658	0.485776	2.0658	1.21556	0.0153	89.91
1.4631	2.86667	2.4069	0.509956	2.0658	1.21958	0.0153	91.49
1.4631	2.7697	2.4069	0.50915	2.4069	0.0048831	0.0181	89.25
1.7622	4.27273	2.7531	0.479327	2.4069	0.0169363	0.0181	90.29
1.7622	4.24848	2.7531	0.471267	2.7531	0.0129186	0.0181	91.67
2.0658	3.20909	3.1097	0.032788	2.7531	0.0129186	0.0219	87.9
2.0658	3.20909	3.1097	0.493836	3.1097	0.0102401	0.0219	87.51
2.4069	4.62727	3.4567	0.457565	3.4567	0.0115793	0.0219	91.05
2.4069	4.55455	3.4567	0.462401	3.4567	0.0155971	0.0394	89.23
2.7531	5.24545	3.7817	0.519152	3.7817	0.0202123	0.0394	89.45
2.7531	4.73636	3.7817	0.514937	3.7817	0.0139961	0.0394	91.78
3.1097	4.40909	4.1256	0.530743	4.1256	0.0152393	0.0572	89.07
3.1097	4.11818	4.1256	0.523367	4.1256	0.0115096	0.0572	90.07
3.4567	4.62727	4.4836	0.534957	4.4836	0.0177258	0.0572	91.52
3.4567	4.88182	4.4836	0.523367	4.4836	0.0127529	0.0739	89.08
3.7817	5.825	4.8667	0.403247	4.8667	0.0115096	0.0739	89.85
3.7817	5.78864	4.8667	0.380066	4.8667	0.0102664	0.0739	92.09
4.1256	5.27955	5.1833	0.416945	5.1833	0.0127529	0.0906	88.95
4.1256	5.35227	5.1833	0.423267	5.1833	0.0139961	0.0906	90.39
4.4836	5.64318	5.5056	0.349076	5.5056	0.00364714	0.0906	91.66
4.4836	6.18864	5.8308	0.409462	5.5056	0.0347583	0.1072	88.93
4.8667	6.18864	5.8308	0.416613	5.8308	0.0185264	0.1072	90.22
4.8667	6.40682	6.1489	0.216386	5.8308	0.0212317	0.1072	92
5.1833	5.60682	6.1489	0.207646	6.1489	0.019879	0.1239	89.29
5.1833	5.93409	6.4694	0.291868	6.1489	0.0158211	0.1239	90.25
5.8308	7.35455	6.4694	0.290279	6.4694	0.0672221	0.1239	91.31
5.8308	6.80909	6.8183	0.388803	6.4694	0.0658694	0.1406	89.06
6.1489	6.19091	7.1431	0.182283	6.8183	0.252536	0.1406	90.45
6.1489	6.48182	7.4639	0.311691	7.1431	0.00203608	0.1406	91.8
6.4694	7.5	7.7864	0.513944	7.1431	0.0223641	0.1572	89.16
6.4694	7.39091	7.7864	0.46938	7.4639	0.0223641	0.1572	91.04
6.8183	7.35455	8.1381	0.299693	7.7864	0.0426922	0.1572	91.95
6.8183	7.20909	8.4594	0.183997	7.7864	0.0757253	0.1739	89.29
7.1431	10.5523	8.4594	0.38625	8.1381	0.0744548	0.1739	90.9
7.4639	8.26136	12.9364	0.444308	8.4594	0.0325282	0.1739	91.57
7.7864	9.64318	12.9364	0.464923	12.9364	0.00747716	0.1906	88.73
7.7864	9.27955	12.9711	0.670215	12.9364	0.00494364	0.1906	91.02
8.1381	8.225	13.0061	0.500999	12.9711	0.0062104	0.1906	91.91
8.4594	9.78864			12.9711	0.00494364	0.2072	89.27
8.4594	9.825			13.0061	0.00367687	0.2072	90.69
12.9364	15.8902			13.0061	1.71381	0.2072	91.58
12.9364	15.8902					0.2239	89.09
12.9711	8.13258					0.2239	90.64
13.0061	13.4053					0.2239	92.42
13.0061	14.6174					0.2406	88.95
						0.2406	91.21
						0.2406	92.1
						0.2572	89.31
						0.2572	91.15
						0.2572	91.61
						0.2739	89.15
						0.2739	91.65
						0.2739	92.23
						0.2906	89.22
						0.2906	91.33
						0.2906	91.55
						0.3072	89.44
						0.3072	91.4
						0.3072	91.72
						0.3239	87.7
						0.3239	89.98
						0.3239	91.23
						0.3406	80.56
						0.3406	81.21
						0.3406	84.22
						0.3572	77.84
						0.3572	78.01
						0.3572	81.6
						0.3739	77.55
						0.3739	76.86
						0.3739	80.68
						0.3906	77.52
						0.3906	77
						0.3906	81.6
						0.4072	77.07
						0.4072	76.18
						0.4072	80.99
						0.4239	76.8
						0.4239	76
						0.4239	79.89
						0.4406	76.38
						0.4406	75.15
						0.4406	79.85
						0.4572	75.4
						0.4572	74.78
						0.4572	79.67
						0.4739	75.02
						0.4739	74.32
						0.4739	79.21
						0.4906	74.07
						0.4906	74.14
						0.4906	78.61
						0.5072	74.36
						0.5072	73.39
						0.5072	77.71
						0.5239	74.51
						0.5239	73.31
						0.5239	78.27
						0.5406	74.01
						0.5406	73.66
						0.5406	77.64
						0.5572	74.07
						0.5572	73.28
						0.5572	77.51
						0.5739	73.7
						0.5739	72.98
						0.5739	77.86
						0.5906	73.18
						0.5906	72.88
						0.5906	77.73
						0.6072	73.59
						0.6072	72.51
						0.6072	77.29
						0.6239	73.41
						0.6239	72.12
						0.6239	77.34
						0.6406	73.1
						0.6406	71.97
						0.6406	75.99
						0.6572	73.13
						0.6572	72.01
						0.6572	76.02
						0.6739	73.21
						0.6739	71.89
						0.6739	75.93
						0.6906	73.57
						0.6906	71
						0.6906	76.47
						0.7072	72.87
						0.7072	71.35
						0.7072	76.66
						0.7239	73.11
						0.7239	71.08
						0.7239	76.74
						0.7406	73.29
						0.7406	70.99
						0.7406	76.66
						0.7572	73.61
						0.7572	71.1
						0.7572	76.86
						0.7739	73.81
						0.7739	71.51
						0.7739	77.24
						0.7906	74.63
						0.7906	72.18
						0.7906	77.24
						0.8072	74.51
						0.8072	71.79
						0.8072	77.65
						0.8239	75.17
						0.8239	72.51
						0.8239	77.98
						0.8406	75.1
						0.8406	73.03
						0.8406	77.9
						0.8572	74.92
						0.8572	73.1
						0.8572	77.97
						0.8739	75.32
						0.8739	74.07
						0.8739	78.36
						0.8906	75.28
						0.8906	74.02
						0.8906	78.29
						0.9072	75.2
						0.9072	73.86
						0.9072	78.09
						0.9239	74.9
						0.9239	74.01
						0.9239	77.72
						0.9406	73.75
						0.9406	74.35
						0.9406	77.53
						0.9572	74.16
						0.9572	73.7
						0.9572	77.04
						0.9739	73.23
						0.9739	73.73
						0.9739	76.79
						0.9906	72.9
						0.9906	73.44
						0.9906	75.8
						1.0072	72.67
						1.0072	73.33
						1.0072	75.46
						1.0239	71.95
						1.0239	72.53
						1.0239	75.36
						1.0406	71.5
						1.0406	72.04
						1.0406	74.3
						1.0572	70.69
						1.0572	71.46
						1.0572	73.99
						1.0739	70.26
						1.0739	70.96
						1.0739	73.45
						1.0906	69.79
						1.0906	70.16
						1.0906	73.47
						1.1072	69.7
						1.1072	70.07
						1.1072	72.55
						1.1239	69.24
						1.1239	69.43
						1.1239	72.89
						1.1406	69.46
						1.1406	68.82
						1.1406	72.95
						1.1572	68.69
						1.1572	69.2
						1.1572	72.69
						1.1739	68.7
						1.1739	69.24
						1.1739	71.68
						1.1906	67.87
						1.1906	69.26
						1.1906	72.06
						1.2072	68.58
						1.2072	69.8
						1.2072	72.01
						1.2239	68
						1.2239	69.63
						1.2239	72.26
						1.2406	68.23
						1.2406	69.49
						1.2406	72.29
						1.2572	68.71
						1.2572	69.62
						1.2572	72.15
						1.2739	68.97
						1.2739	69.4
						1.2739	72.05
						1.2906	68.93
						1.2906	69.56
						1.2906	72.46
						1.3072	68.32
						1.3072	69.72
						1.3072	72.01
						1.3239	68.49
						1.3239	69.25
						1.3239	72.03
						1.3406	67.93
						1.3406	69.13
						1.3406	71.64
						1.3572	67.96
						1.3572	68.93
						1.3572	71.74
						1.3739	67.55
						1.3739	82.41
						1.3739	71.03
						1.3906	68.03
						1.3906	85.25
						1.3906	70.87
						1.4072	67.88
						1.4072	86.01
						1.4072	70.29
						1.4239	67.57
						1.4239	84.27
						1.4239	69.75
						1.4406	67.61
						1.4406	71.61
						1.4406	70.28
						1.4572	67.42
						1.4572	67.88
						1.4572	69.04
						1.4739	66.48
						1.4739	66.21
						1.4739	69.5
						1.4906	66.13
						1.4906	65.65
						1.4906	69.62
						1.5072	65.95
						1.5072	65.36
						1.5072	69.14
						1.5239	65.92
						1.5239	65.41
						1.5239	68.71
						1.5406	65.16
						1.5406	65.56
						1.5406	67.54
						1.5572	64.81
						1.5572	65.37
						1.5572	67.01
						1.5739	64.5
						1.5739	65.88
						1.5739	67.43
						1.5906	63.82
						1.5906	65.26
						1.5906	66.64
						1.6072	63.57
						1.6072	65.75
						1.6072	65.77
						1.6239	62.74
						1.6239	65.8
						1.6239	66.71
						1.6406	62.73
						1.6406	65.66
						1.6406	64.93
						1.6572	62.25
						1.6572	65.5
						1.6572	65.68
						1.6739	62.02
						1.6739	66.1
						1.6739	65.35
						1.6906	62.07
						1.6906	65.53
						1.6906	64.38
						1.7072	62.53
						1.7072	65.23
						1.7072	64.4
						1.7239	62.06
						1.7239	65.25
						1.7239	61.64
						1.7406	62.31
						1.7406	64.44
						1.7406	64.13
						1.7572	53.61
						1.7572	64.58
						1.7572	62.92
						1.7739	39.69
						1.7739	64.46
						1.7739	63.68
						1.7906	47.59
						1.7906	64.17
						1.7906	63.55
						1.8072	58.85
						1.8072	64.16
						1.8072	64.36
						1.8239	60
						1.8239	63.54
						1.8239	63.36
						1.8406	59.68
						1.8406	63.48
						1.8406	63.12
						1.8572	61.12
						1.8572	63.73
						1.8572	62.83
						1.8739	61.21
						1.8739	62.98
						1.8739	63.42
						1.8906	54.5
						1.8906	62.29
						1.8906	62.55
						1.9072	47.08
						1.9072	61.95
						1.9072	60.97
						1.9239	52.85
						1.9239	62.31
						1.9239	51.41
						1.9406	48.48
						1.9406	59.88
						1.9406	60.89
						1.9572	56.34
						1.9572	60.94
						1.9572	51.97
						1.9739	55.83
						1.9739	54.81
						1.9739	59.21
						1.9906	55.51
						1.9906	47
						1.9906	60.36
						2.0072	48.65
						2.0072	26.31
						2.0072	59.38
						2.0239	55
						2.0239	23.63
						2.0239	46.53
						2.0406	50.43
						2.0406	10.21
						2.0406	50.66
						2.0572	45.43
						2.0572	3.74
						2.0572	54.08
						2.0739	53.43
						2.0739	2.15
						2.0739	58.35
						2.0906	54.87
						2.0906	1.73
						2.0906	57.13
						2.1072	45.92
						2.1072	1.47
						2.1072	57.78
						2.1239	52.36
						2.1239	45.07
						2.1239	58.39
						2.1406	47.59
						2.1406	44.31
						2.1406	56.69
						2.1572	53.84
						2.1572	53.03
						2.1572	56.84
						2.1739	54.67
						2.1739	50.25
						2.1739	45.5
						2.1906	53.99
						2.1906	58.13
						2.1906	53.58
						2.2072	42.24
						2.2072	64.95
						2.2072	55.66
						2.2239	52.36
						2.2239	73.69
						2.2239	52.64
						2.2406	52.49
						2.2406	71.81
						2.2406	54.74
						2.2572	46.45
						2.2572	80.64
						2.2572	54.79
						2.2739	44.84
						2.2739	79.47
						2.2739	54
						2.2906	50.18
						2.2906	82.03
						2.2906	53.27
						2.3072	50.88
						2.3072	78.86
						2.3072	52.19
						2.3239	50.83
						2.3239	77.85
						2.3239	52.76
						2.3406	46.43
						2.3406	76.93
						2.3406	53.62
						2.3572	44.59
						2.3572	76.63
						2.3572	52.7
						2.3739	49.29
						2.3739	75.66
						2.3739	51.38
						2.3906	42.43
						2.3906	75.61
						2.3906	47.06
						2.4072	46.68
						2.4072	75.92
						2.4072	51.05
						2.4239	44.64
						2.4239	75.17
						2.4239	49.58
						2.4406	46.28
						2.4406	74.89
						2.4406	51.36
						2.4572	70.66
						2.4572	73.62
						2.4572	52.56
						2.4739	79.36
						2.4739	73.61
						2.4739	53.24
						2.4906	80.46
						2.4906	73.06
						2.4906	38.01
						2.5072	82.5
						2.5072	72.67
						2.5072	52.9
						2.5239	83.32
						2.5239	71.51
						2.5239	77.68
						2.5406	83.26
						2.5406	71.49
						2.5406	81.35
						2.5572	84.62
						2.5572	70.73
						2.5572	83.11
						2.5739	85.15
						2.5739	68.76
						2.5739	81.71
						2.5906	86.21
						2.5906	69.42
						2.5906	82.92
						2.6072	86.52
						2.6072	76.03
						2.6072	82.86
						2.6239	85.75
						2.6239	82.78
						2.6239	84.75
						2.6406	86.41
						2.6406	81.47
						2.6406	84.63
						2.6572	85.88
						2.6572	83.01
						2.6572	85.71
						2.6739	86.32
						2.6739	80.87
						2.6739	84.32
						2.6906	84.9
						2.6906	76.04
						2.6906	85.36
						2.7072	83.68
						2.7072	71.25
						2.7072	85.79
						2.7239	85.6
						2.7239	65.8
						2.7239	86.58
						2.7406	85.99
						2.7406	75.9
						2.7406	86.55
						2.7572	84.59
						2.7572	84.07
						2.7572	87.06
						2.7739	83.84
						2.7739	85.28
						2.7739	86.92
						2.7906	85.41
						2.7906	85.3
						2.7906	86.96
						2.8072	85.3
						2.8072	85.55
						2.8072	86.47
						2.8239	85.95
						2.8239	85.59
						2.8239	86.99
						2.8406	84.31
						2.8406	85.54
						2.8406	87.18
						2.8572	85.88
						2.8572	85.75
						2.8572	86.67
						2.8739	85.32
						2.8739	85.54
						2.8739	83.71
						2.8906	87.15
						2.8906	85.65
						2.8906	85.38
						2.9072	87.12
						2.9072	85.83
						2.9072	86.8
						2.9239	86.4
						2.9239	85.64
						2.9239	86.07
						2.9406	85.97
						2.9406	86.04
						2.9406	86
						2.9572	67.02
						2.9572	65.86
						2.9572	71.12
						2.9739	49.22
						2.9739	55.57
						2.9739	51.98
						2.9906	71.55
						2.9906	75.92
						2.9906	53.96
						3.0072	80.11
						3.0072	80.78
						3.0072	74.72
						3.0239	77.14
						3.0239	82.25
						3.0239	78.25
						3.0406	74.96
						3.0406	83.64
						3.0406	79.6
						3.0572	77.29
						3.0572	83.68
						3.0572	80.55
						3.0739	69.2
						3.0739	71.11
						3.0739	73.29
						3.0906	52.2
						3.0906	55.46
						3.0906	55.2
						3.1072	49.66
						3.1072	66.38
						3.1072	47.62
						3.1239	69.24
						3.1239	77.38
						3.1239	57.57
						3.1406	68.12
						3.1406	81.15
						3.1406	71.41
						3.1572	69.59
						3.1572	82.73
						3.1572	74.31
						3.1739	77.69
						3.1739	83.46
						3.1739	76.66
						3.1906	62.32
						3.1906	63.92
						3.1906	67.35
						3.2072	50.24
						3.2072	53.31
						3.2072	54.27
						3.2239	42.55
						3.2239	63.59
						3.2239	47.75
						3.2406	57.12
						3.2406	75.97
						3.2406	50.2
						3.2572	66.64
						3.2572	79.74
						3.2572	69.14
						3.2739	73.46
						3.2739	82.3
						3.2739	74.19
						3.2906	76.44
						3.2906	83.68
						3.2906	76.27
						3.3072	70.33
						3.3072	79.32
						3.3072	67.91
						3.3239	57.65
						3.3239	56.26
						3.3239	50.16
						3.3406	51.44
						3.3406	49.88
						3.3406	38.35
						3.3572	48.33
						3.3572	67.24
						3.3572	42.37
						3.3739	51.6
						3.3739	77.53
						3.3739	48.64
						3.3906	70.87
						3.3906	80.7
						3.3906	57.06
						3.4072	74.94
						3.4072	82.94
						3.4072	62.72
						3.4239	65.94
						3.4239	70.3
						3.4239	56.38
						3.4406	54.27
						3.4406	40.72
						3.4406	49.83
						3.4572	37.59
						3.4572	19.06
						3.4572	43.31
						3.4739	44.4
						3.4739	30.63
						3.4739	36.14
						3.4906	67.05
						3.4906	32.09
						3.4906	64.4
						3.5072	73.47
						3.5072	30.31
						3.5072	73.47
						3.5239	66.61
						3.5239	24.83
						3.5239	74.93
						3.5406	56.73
						3.5406	3.51
						3.5406	53.64
						3.5572	50.43
						3.5572	2.37
						3.5572	38.12
						3.5739	34.21
						3.5739	1.86
						3.5739	37.84
						3.5906	60.24
						3.5906	1.56
						3.5906	61.23
						3.6072	72.24
						3.6072	1.32
						3.6072	72.9
						3.6239	74.22
						3.6239	1.16
						3.6239	76.33
						3.6406	64.15
						3.6406	1
						3.6406	70.71
						3.6572	47.38
						3.6572	0.9
						3.6572	46.83
						3.6739	42.94
						3.6739	28.38
						3.6739	40.79
						3.6906	24.73
						3.6906	37.5
						3.6906	37.58
						3.7072	41.51
						3.7072	58.07
						3.7072	39.99
						3.7239	67.86
						3.7239	71.73
						3.7239	55.94
						3.7406	66.38
						3.7406	67.69
						3.7406	69.69
						3.7572	45.16
						3.7572	45.59
						3.7572	49.69
						3.7739	40.98
						3.7739	40.89
						3.7739	39.48
						3.7906	39.28
						3.7906	61.19
						3.7906	35.42
						3.8072	51.28
						3.8072	75.28
						3.8072	50.17
						3.8239	68.71
						3.8239	78.72
						3.8239	59.14
						3.8406	71.79
						3.8406	79.63
						3.8406	66.4
						3.8572	47.7
						3.8572	52.61
						3.8572	42.7
						3.8739	42.06
						3.8739	44.61
						3.8739	13.19
						3.8906	38.6
						3.8906	60.98
						3.8906	27.89
						3.9072	58.52
						3.9072	75.05
						3.9072	47.88
						3.9239	70.11
						3.9239	78.89
						3.9239	68.98
						3.9406	71.75
						3.9406	80.2
						3.9406	74.78
						3.9572	67.43
						3.9572	77.71
						3.9572	76.33
						3.9739	51.14
						3.9739	49.88
						3.9739	49.93
						3.9906	38.57
						3.9906	45.38
						3.9906	22.64
						4.0072	36.09
						4.0072	52.89
						4.0072	24.88
						4.0239	52.62
						4.0239	72.91
						4.0239	40.87
						4.0406	63.89
						4.0406	77.74
						4.0406	52.74
						4.0572	72.83
						4.0572	80.73
						4.0572	71.14
						4.0739	74.48
						4.0739	81.98
						4.0739	75.82
						4.0906	63.56
						4.0906	71.42
						4.0906	72.65
						4.1072	35.53
						4.1072	49.61
						4.1072	46.9
						4.1239	24.71
						4.1239	57.37
						4.1239	31.72
						4.1406	40.51
						4.1406	75.17
						4.1406	46.13
						4.1572	44.15
						4.1572	79.63
						4.1572	64.99
						4.1739	62.38
						4.1739	81.14
						4.1739	68.79
						4.1906	66.89
						4.1906	81.87
						4.1906	73.04
						4.2072	54.71
						4.2072	59.82
						4.2072	58.61
						4.2239	26.73
						4.2239	45.29
						4.2239	37.23
						4.2406	11.37
						4.2406	65.95
						4.2406	28.08
						4.2572	53.09
						4.2572	76.37
						4.2572	60.19
						4.2739	63.47
						4.2739	78.03
						4.2739	69.92
						4.2906	71.55
						4.2906	79.75
						4.2906	73.41
						4.3072	73.39
						4.3072	82.26
						4.3072	75.4
						4.3239	73.03
						4.3239	84
						4.3239	77
						4.3406	46.01
						4.3406	53.18
						4.3406	49.95
						4.3572	34.14
						4.3572	42.27
						4.3572	31.49
						4.3739	23.06
						4.3739	66.48
						4.3739	32.98
						4.3906	54.16
						4.3906	68.64
						4.3906	60.5
						4.4072	55.62
						4.4072	67.19
						4.4072	69.74
						4.4239	68.77
						4.4239	64.97
						4.4239	74.8
						4.4406	69.21
						4.4406	62.02
						4.4406	76.74
						4.4572	45.25
						4.4572	25.47
						4.4572	50.75
						4.5056	13.41
						4.5056	5.29
						4.5056	28.98
						4.5136	40.09
						4.5136	10.02
						4.5136	57.3
						4.5303	60.93
						4.5303	6.82
						4.5303	67.8
						4.5469	70.95
						4.5469	4.27
						4.5469	73.57
						4.5636	73.96
						4.5636	2.07
						4.5636	77.08
						4.5803	54
						4.5803	1.29
						4.5803	65.9
						4.5969	34.72
						4.5969	1.08
						4.5969	34.01
						4.6136	34.25
						4.6136	8.48
						4.6136	29.2
						4.6303	46.15
						4.6303	46.54
						4.6303	59.15
						4.6469	64.56
						4.6469	68.73
						4.6469	69.35
						4.6636	71.92
						4.6636	75.21
						4.6636	73.24
						4.6803	72.55
						4.6803	79.98
						4.6803	71.84
						4.6969	67.74
						4.6969	81.75
						4.6969	79.05
						4.7136	70.78
						4.7136	83.29
						4.7136	80.88
						4.7303	53.22
						4.7303	54.57
						4.7303	62.34
						4.7469	33.91
						4.7469	39.03
						4.7469	16.5
						4.7636	32.69
						4.7636	64.13
						4.7636	32.76
						4.7803	37.23
						4.7803	75.12
						4.7803	61.07
						4.7969	54.88
						4.7969	79.21
						4.7969	69.63
						4.8136	57.8
						4.8136	81.74
						4.8136	75.26
						4.8303	45.4
						4.8303	77.84
						4.8303	76.94
						4.8469	34.16
						4.8469	33.23
						4.8469	38.3
						4.8636	23.25
						4.8636	21.73
						4.8636	21.96
						4.8803	45.23
						4.8803	21.5
						4.8803	46.12
						4.8969	65.31
						4.8969	24.08
						4.8969	66.08
						4.9136	62.06
						4.9136	19.08
						4.9136	72.57
						4.9303	67.57
						4.9303	12.85
						4.9303	75.15
						4.9469	19.81
						4.9469	2.19
						4.9469	38.12
						4.9636	4.46
						4.9636	1.57
						4.9636	20.96
						4.9803	36.24
						4.9803	1.22
						4.9803	31.37
						4.9969	61.94
						4.9969	0.97
						4.9969	60.73
						5.0136	68.1
						5.0136	6.68
						5.0136	70.97
						5.0303	72.93
						5.0303	52.55
						5.0303	75.15
						5.0469	60.4
						5.0469	52.15
						5.0469	60.99
						5.0636	32.76
						5.0636	30.04
						5.0636	32.68
						5.0803	25.09
						5.0803	33.47
						5.0803	20.25
						5.0969	50.1
						5.0969	57.57
						5.0969	43.84
						5.1136	66.12
						5.1136	65.93
						5.1136	63.94
						5.1303	72.79
						5.1303	71.56
						5.1303	72.03
						5.1469	68.32
						5.1469	69.48
						5.1469	72.34
						5.1636	30.36
						5.1636	36.08
						5.1636	34.9
						5.1803	3.63
						5.1803	30.57
						5.1803	24.46
						5.1969	36.15
						5.1969	55.57
						5.1969	35.48
						5.2136	61.6
						5.2136	68.25
						5.2136	60.12
						5.2303	68.88
						5.2303	74.38
						5.2303	70.72
						5.2469	71.64
						5.2469	76.28
						5.2469	75.89
						5.2636	43.58
						5.2636	35.23
						5.2636	47.54
						5.2803	29.88
						5.2803	8.45
						5.2803	8.73
						5.2969	30.9
						5.2969	3.13
						5.2969	18.04
						5.3136	60.29
						5.3136	3.8
						5.3136	55.29
						5.3303	69.22
						5.3303	1.9
						5.3303	59.47
						5.3469	73.69
						5.3469	1.25
						5.3469	71.94
						5.3636	69.89
						5.3636	45.37
						5.3636	75.42
						5.3803	36.22
						5.3803	25.42
						5.3803	34.58
						5.3969	27.36
						5.3969	21.76
						5.3969	24.1
						5.4136	35.84
						5.4136	42.18
						5.4136	27.49
						5.4303	61.13
						5.4303	56.65
						5.4303	59.98
						5.4469	69.83
						5.4469	55.8
						5.4469	71.37
						5.4636	72.84
						5.4636	53.05
						5.4636	75.12
						5.4803	39.25
						5.4803	9.57
						5.4803	43.31
						5.4969	27.42
						5.4969	2.66
						5.4969	27.19
						5.5136	29.22
						5.5136	1.7
						5.5136	27.77
						5.5303	34.73
						5.5303	1.24
						5.5303	52.85
						5.5469	60.73
						5.5469	0.93
						5.5469	69.36
						5.5636	61.4
						5.5636	0.76
						5.5636	73.66
						5.5803	33.93
						5.5803	0.56
						5.5803	44.36
						5.5969	25.45
						5.5969	0.47
						5.5969	26.28
						5.6136	27.71
						5.6136	0.39
						5.6136	26.25
						5.6303	31.28
						5.6303	0.28
						5.6303	46.06
						5.6469	55.15
						5.6469	0.24
						5.6469	67.42
						5.6636	59.72
						5.6636	0.16
						5.6636	71.94
						5.6803	64.33
						5.6803	0.12
						5.6803	74.53
						5.6969	35.57
						5.6969	0.08
						5.6969	44.59
						5.7136	22.28
						5.7136	0
						5.7136	21.12
						5.7303	23.94
						5.7303	0.07
						5.7303	19.37
						5.7469	23
						5.7469	3.8
						5.7469	32.66
						5.7636	50.72
						5.7636	14.33
						5.7636	62.25
						5.7803	60.56
						5.7803	21.85
						5.7803	69.68
						5.7969	46.39
						5.7969	30.96
						5.7969	62.8
						5.8136	22.17
						5.8136	25.63
						5.8136	25.62
						5.8303	24.49
						5.8303	19
						5.8303	22.95
						5.8469	50.01
						5.8469	37.94
						5.8469	56.07
						5.8636	61.94
						5.8636	53.38
						5.8636	70.36
						5.8803	67.39
						5.8803	59.72
						5.8803	74.41
						5.8969	55.69
						5.8969	54.14
						5.8969	68.75
						5.9136	25.7
						5.9136	26.49
						5.9136	28.24
						5.9303	21.66
						5.9303	17.94
						5.9303	22.25
						5.9469	50.98
						5.9469	43.69
						5.9469	58
						5.9636	63.22
						5.9636	53.98
						5.9636	70.25
						5.9803	67.51
						5.9803	58.84
						5.9803	74.85
						5.9969	70.56
						5.9969	62.11
						5.9969	77
						6.0136	45.36
						6.0136	42.5
						6.0136	56.04
						6.0303	22.23
						6.0303	18.38
						6.0303	25.29
						6.0469	21.3
						6.0469	19.82
						6.0469	22.68
						6.0636	49.5
						6.0636	45.49
						6.0636	53.42
						6.0803	63.21
						6.0803	56.16
						6.0803	68.72
						6.0969	68.23
						6.0969	64.03
						6.0969	73
						6.1136	54.7
						6.1136	56.84
						6.1136	67.97
						6.1303	24.63
						6.1303	21.66
						6.1303	28.72
						6.1469	20.07
						6.1469	17.06
						6.1469	21.77
						6.1636	43.42
						6.1636	48.47
						6.1636	48.64
						6.1803	61.79
						6.1803	63.31
						6.1803	67.21
						6.1969	67.77
						6.1969	69.95
						6.1969	73.07
						6.2136	59.86
						6.2136	65.24
						6.2136	72.49
						6.2303	24.92
						6.2303	21.35
						6.2303	31.34
						6.2469	18.96
						6.2469	17.17
						6.2469	24.27
						6.2636	45.17
						6.2636	44.04
						6.2636	48.38
						6.2803	63.27
						6.2803	60.44
						6.2803	67.57
						6.2969	68.8
						6.2969	68.58
						6.2969	71.9
						6.3136	72.08
						6.3136	71.81
						6.3136	74.93
						6.3303	49.92
						6.3303	52.17
						6.3303	61.99
						6.3469	21.08
						6.3469	19.45
						6.3469	28.53
						6.3636	17.85
						6.3636	17.34
						6.3636	23.3
						6.3803	44.74
						6.3803	46.95
						6.3803	45.47
						6.3969	62.45
						6.3969	63.13
						6.3969	66.07
						6.4136	67.42
						6.4136	69.77
						6.4136	70.48
						6.4303	67.23
						6.4303	72.55
						6.4303	73.01
						6.4469	25.44
						6.4469	24.91
						6.4469	33.25
						6.4636	17.63
						6.4636	16.73
						6.4636	23.47
						6.4803	24.52
						6.4803	33.68
						6.4803	24.74
						6.4969	56.58
						6.4969	59.75
						6.4969	60.52
						6.5136	65
						6.5136	67.3
						6.5136	68.22
						6.5303	70
						6.5303	70.94
						6.5303	71.52
						6.5469	49.02
						6.5469	51.09
						6.5469	61.13
						6.5636	21.74
						6.5636	6.3
						6.5636	27.33
						6.5803	21.53
						6.5803	2.85
						6.5803	23.69
						6.5969	58.18
						6.5969	7.74
						6.5969	61.29
						6.6136	67.41
						6.6136	2.69
						6.6136	68.82
						6.6303	71.23
						6.6303	1.23
						6.6303	72.36
						6.6469	73.26
						6.6469	0.91
						6.6469	74.38
						6.6636	39.01
						6.6636	0.73
						6.6636	49.45
						6.6803	19.44
						6.6803	0.56
						6.6803	25.17
						6.6969	31.34
						6.6969	0.47
						6.6969	27.24
						6.7136	61.76
						6.7136	0.37
						6.7136	61.91
						6.7303	69.07
						6.7303	0.26
						6.7303	69.34
						6.7469	71.55
						6.7469	0.21
						6.7469	71.9
						6.7636	53.48
						6.7636	0.14
						6.7636	63.86
						6.7803	21.89
						6.7803	0.08
						6.7803	27.44
						6.7969	18.02
						6.7969	0.01
						6.7969	22.59
						6.8136	53.62
						6.8136	0
						6.8136	54.69
						6.8303	64.94
						6.8303	0
						6.8303	65.9
						6.8469	68.37
						6.8469	0.03
						6.8469	68.61
						6.8636	70.94
						6.8636	1.2
						6.8636	70.07
						6.8803	72.28
						6.8803	14
						6.8803	72.07
						6.8969	35.57
						6.8969	24.91
						6.8969	43.29
						6.9136	17.53
						6.9136	22.56
						6.9136	22.55
						6.9303	24.93
						6.9303	14.36
						6.9303	19.21
						6.9469	59.97
						6.9469	28.21
						6.9469	57.17
						6.9636	66.48
						6.9636	49.47
						6.9636	65.02
						6.9803	68.68
						6.9803	59
						6.9803	66.92
						6.9969	71.26
						6.9969	63.09
						6.9969	69.54
						7.0136	26.84
						7.0136	17.93
						7.0136	32.14
						7.0303	15.9
						7.0303	10.4
						7.0303	19.53
						7.0469	30.74
						7.0469	28.24
						7.0469	20.27
						7.0636	59.43
						7.0636	49.89
						7.0636	56.63
						7.0803	65.16
						7.0803	61.87
						7.0803	64.26
						7.0969	68.04
						7.0969	68.04
						7.0969	65.47
						7.1136	34.06
						7.1136	36.14
						7.1136	41.5
						7.1303	15.78
						7.1303	12
						7.1303	19.02
						7.1469	14.74
						7.1469	12.62
						7.1469	17.09
						7.1636	49.85
						7.1636	46.74
						7.1636	44.67
						7.1803	61.5
						7.1803	61.58
						7.1803	61.39
						7.1969	64.82
						7.1969	67.32
						7.1969	65.11
						7.2136	36.83
						7.2136	41.39
						7.2136	46.87
						7.2303	14.18
						7.2303	12.61
						7.2303	20.06
						7.2469	13
						7.2469	11.99
						7.2469	17.38
						7.2636	47.46
						7.2636	44.83
						7.2636	32.6
						7.2803	61.12
						7.2803	60.8
						7.2803	59.43
						7.2969	64.92
						7.2969	66.8
						7.2969	63.5
						7.3136	67.92
						7.3136	70.63
						7.3136	65.12
						7.3303	32.62
						7.3303	35.75
						7.3303	40.54
						7.3469	13.82
						7.3469	11.91
						7.3469	18.98
						7.3636	11.81
						7.3636	11.16
						7.3636	15.07
						7.3803	41.34
						7.3803	39.7
						7.3803	22.87
						7.3969	58.85
						7.3969	58.39
						7.3969	57.09
						7.4136	63
						7.4136	65.2
						7.4136	62.76
						7.4303	41.8
						7.4303	47.51
						7.4303	51.56
						7.4469	13.51
						7.4469	11.87
						7.4469	17.13
						7.4636	10.89
						7.4636	9.1
						7.4636	12.51
						7.4803	34.93
						7.4803	35.3
						7.4803	34.49
						7.4969	57.4
						7.4969	50.27
						7.4969	58.17
						7.5136	62.48
						7.5136	46.68
						7.5136	62.23
						7.5303	53.43
						7.5303	35.83
						7.5303	61.81
						7.5469	16.67
						7.5469	3.17
						7.5469	20.33
						7.5636	10.22
						7.5636	1.68
						7.5636	10.81
						7.5803	22.18
						7.5803	1.13
						7.5803	12.53
						7.5969	54.86
						7.5969	0.81
						7.5969	51.21
						7.6136	61.32
						7.6136	0.56
						7.6136	59.99
						7.6303	64.78
						7.6303	0.4
						7.6303	63.07
						7.6469	43.64
						7.6469	0.29
						7.6469	53.44
						7.6636	14.28
						7.6636	0.18
						7.6636	17.1
						7.6803	8.45
						7.6803	0.11
						7.6803	8.09
						7.6969	15.54
						7.6969	0.05
						7.6969	10.55
						7.7136	52.08
						7.7136	0
						7.7136	44.94
						7.7303	59.7
						7.7303	0
						7.7303	58.18
						7.7469	58.07
						7.7469	0
						7.7469	61.4
						7.7636	15.35
						7.7636	0
						7.7636	17.52
						7.7803	8.03
						7.7803	0
						7.7803	6.58
						7.7969	9.23
						7.7969	0
						7.7969	7.62
						7.8136	46.22
						7.8136	0
						7.8136	37.05
						7.8303	57.36
						7.8303	0
						7.8303	55.91
						7.8469	61.96
						7.8469	0
						7.8469	60.18
						7.8636	65.03
						7.8636	0
						7.8636	63.47
						7.8803	66.97
						7.8803	0
						7.8803	65.63
						7.8969	18.11
						7.8969	0
						7.8969	20.79
						7.9136	6.63
						7.9136	0
						7.9136	6.49
						7.9303	6.91
						7.9303	0
						7.9303	6.12
						7.9469	35.83
						7.9469	1.15
						7.9469	26.48
						7.9636	54.72
						7.9636	4.01
						7.9636	52.61
						7.9803	59.1
						7.9803	6.95
						7.9803	58
						7.9969	48.97
						7.9969	4.18
						7.9969	57.54
						8.0136	10.73
						8.0136	0.14
						8.0136	11.76
						8.0303	5.35
						8.0303	0
						8.0303	5.6
						8.0469	6.71
						8.0469	0
						8.0469	4.69
						8.0636	43.69
						8.0636	0
						8.0636	36.07
						8.0803	56.03
						8.0803	0
						8.0803	55.25
						8.0969	60.57
						8.0969	0
						8.0969	59.2
						8.1136	14.32
						8.1136	0
						8.1136	16.92
						8.1303	4.72
						8.1303	0
						8.1303	3.98
						8.1469	4.82
						8.1469	0
						8.1469	4.7
						8.1636	31.6
						8.1636	0
						8.1636	19.29
						8.1803	51.45
						8.1803	0
						8.1803	50.18
						8.1969	57.72
						8.1969	0
						8.1969	56.5
						8.2136	13.62
						8.2136	0
						8.2136	19.12
						8.2303	4.17
						8.2303	0
						8.2303	3.55
						8.2469	4.03
						8.2469	0
						8.2469	3.39
						8.2636	24.93
						8.2636	0
						8.2636	12.2
						8.2803	51.63
						8.2803	0
						8.2803	48.39
						8.2969	58.52
						8.2969	0
						8.2969	57.47
						8.3136	62.35
						8.3136	0
						8.3136	61.84
						8.3303	11.71
						8.3303	0
						8.3303	15.03
						8.3469	3.71
						8.3469	0
						8.3469	3.12
						8.3636	3.81
						8.3636	0
						8.3636	3.25
						8.3803	35.8
						8.3803	0
						8.3803	20.61
						8.3969	52.74
						8.3969	0
						8.3969	50.34
						8.4136	57.84
						8.4136	0
						8.4136	58.14
						8.4303	17
						8.4303	0
						8.4303	25.82
						8.4469	2.67
						8.4469	0
						8.4469	3
						8.4636	3.38
						8.4636	0
						8.4636	1.98
						8.4803	22.96
						8.4803	0
						8.4803	12.87
						8.4969	48.07
						8.4969	0
						8.4969	46.8
						8.5136	55.38
						8.5136	0
						8.5136	55.44
						8.5303	38.33
						8.5303	0
						8.5303	50.92
						8.5469	4.17
						8.5469	0
						8.5469	4.92
						8.5636	2.56
						8.5636	0
						8.5636	2.89
						8.5803	5.44
						8.5803	0
						8.5803	1.75
						8.7142	22.04
						8.7142	0
						8.7142	24.74
						8.7169	22.07
						8.7169	0
						8.7169	25.23
						8.7208	5.24
						8.7208	0
						8.7208	5.49
						8.7383	64.89
						8.7383	0
						8.7383	68.2
						8.7561	67.56
						8.7561	0
						8.7561	71.93
						8.7728	70.33
						8.7728	0
						8.7728	74.28
						8.7894	71.06
						8.7894	0
						8.7894	74.09
						8.8061	67.15
						8.8061	0
						8.8061	77.57
						8.8228	70.31
						8.8228	0
						8.8228	78.11
						8.8394	71.91
						8.8394	0
						8.8394	79.25
						8.8561	67.3
						8.8561	0
						8.8561	75.57
						8.8728	70.99
						8.8728	0
						8.8728	77.59
						8.8894	72.33
						8.8894	0
						8.8894	79.34
						8.9061	74.9
						8.9061	0
						8.9061	82.35
						8.9228	76.78
						8.9228	0
						8.9228	82.8
						8.9394	73.54
						8.9394	0
						8.9394	83.62
						8.9561	71.43
						8.9561	0
						8.9561	84.03
						8.9728	73.07
						8.9728	0
						8.9728	81
						8.9894	79.63
						8.9894	0
						8.9894	84.09
						9.0061	77.53
						9.0061	0
						9.0061	85.56
						9.0228	79.76
						9.0228	0
						9.0228	82.87
						9.0394	81.82
						9.0394	0
						9.0394	84.04
						9.0561	82.05
						9.0561	0
						9.0561	86.72
						9.0728	82.55
						9.0728	0
						9.0728	86.77
						9.0894	83.33
						9.0894	0
						9.0894	87.15
						9.1061	83.19
						9.1061	0
						9.1061	87.3
						9.1228	77.73
						9.1228	0
						9.1228	87.79
						9.1394	82.25
						9.1394	0
						9.1394	85.76
						9.1561	84.11
						9.1561	0
						9.1561	87.67
						9.1728	84.81
						9.1728	0
						9.1728	87.68
						9.1894	84.87
						9.1894	0
						9.1894	88.02
						9.2061	84.84
						9.2061	0
						9.2061	88.29
						9.2228	85.31
						9.2228	0
						9.2228	88.62
						9.2394	85.84
						9.2394	0
						9.2394	88.34
						9.2561	85.63
						9.2561	0
						9.2561	88.76
						9.2728	80.86
						9.2728	0
						9.2728	89.4
						9.2894	85.84
						9.2894	0
						9.2894	89.61
						9.3061	86.33
						9.3061	0
						9.3061	88.89
						9.3228	85.99
						9.3228	0
						9.3228	88.96
						9.3394	85.53
						9.3394	0
						9.3394	89.47
						9.3561	85.99
						9.3561	0
						9.3561	89.2
						9.3728	85.67
						9.3728	0
						9.3728	89.16
						9.3894	85.79
						9.3894	5.65
						9.3894	88.89
						9.4061	86.1
						9.4061	34.25
						9.4061	89.45
						9.4228	86.14
						9.4228	36.88
						9.4228	88.9
						9.4394	86.53
						9.4394	38.47
						9.4394	89.48
						9.4561	86.43
						9.4561	39.61
						9.4561	89.3
						9.4728	86.8
						9.4728	40.75
						9.4728	89.23
						9.4894	86.71
						9.4894	42.42
						9.4894	89.4
						9.5061	86.68
						9.5061	44.35
						9.5061	89.61
						9.5228	86.85
						9.5228	45.77
						9.5228	90.01
						9.5394	80.2
						9.5394	41.42
						9.5394	89.68
						9.5561	28.09
						9.5561	30.37
						9.5561	31.46
						9.5728	10.92
						9.5728	17.88
						9.5728	7.99
						9.5894	3.36
						9.5894	7.11
						9.5894	3.24
						9.6061	33.59
						9.6061	1.56
						9.6061	19.85
						9.6228	53.99
						9.6228	0.96
						9.6228	50.08
						9.6394	58.67
						9.6394	0.68
						9.6394	54.93
						9.6561	46.82
						9.6561	0.5
						9.6561	52.79
						9.6728	7.35
						9.6728	0.3
						9.6728	10.24
						9.6894	2.44
						9.6894	0.2
						9.6894	2.44
						9.7061	1.75
						9.7061	0.13
						9.7061	1.65
						9.7228	35.39
						9.7228	0.09
						9.7228	17.71
						9.7394	52.41
						9.7394	0.01
						9.7394	47.04
						9.7561	56.12
						9.7561	0
						9.7561	52.96
						9.7728	45.47
						9.7728	0
						9.7728	50.39
						9.7894	6.11
						9.7894	0
						9.7894	5.05
						9.8061	1.97
						9.8061	0
						9.8061	1.92
						9.8228	1.3
						9.8228	0
						9.8228	1.27
						9.8394	0.95
						9.8394	0
						9.8394	0.94
						9.8561	0.76
						9.8561	0
						9.8561	0.72
						9.8728	0.61
						9.8728	0
						9.8728	0.6
						9.8894	0.46
						9.8894	0
						9.8894	0.5
						9.9061	0.4
						9.9061	0
						9.9061	0.45
						9.9228	0.31
						9.9228	0
						9.9228	0.39
						9.9394	0.22
						9.9394	0
						9.9394	0.3
						9.9561	0.16
						9.9561	0
						9.9561	0.26
						9.9728	0.14
						9.9728	0
						9.9728	0.2
						9.9894	0.09
						9.9894	0
						9.9894	0.16
						10.0061	0.07
						10.0061	0
						10.0061	0.15
						10.0228	6.94
						10.0228	0
						10.0228	1.01
						10.0394	26.14
						10.0394	0
						10.0394	6.43
						10.0561	35.54
						10.0561	0
						10.0561	14.87
						10.0728	46.16
						10.0728	0
						10.0728	31.77
						10.0894	55.19
						10.0894	0
						10.0894	48.85
						10.1061	59.92
						10.1061	0
						10.1061	51.07
						10.1228	63.1
						10.1228	0
						10.1228	61.02
						10.1394	59.47
						10.1394	0
						10.1394	62.92
						10.1561	65.33
						10.1561	0
						10.1561	65.09
						10.1728	62.85
						10.1728	0
						10.1728	67.77
						10.1894	65.26
						10.1894	0
						10.1894	71.81
						10.2061	56.98
						10.2061	0
						10.2061	72.88
						10.2228	61.11
						10.2228	0
						10.2228	73.85
						10.2397	20.21
						10.2397	0
						10.2397	66.21
						10.2561	2.85
						10.2561	0
						10.2561	6.65
						10.2728	1.66
						10.2728	0
						10.2728	2.19
						10.2894	15.82
						10.2894	0
						10.2894	1.43
						10.3061	38.36
						10.3061	0
						10.3061	33.42
						10.3228	48.07
						10.3228	0
						10.3228	39.9
						10.3394	54.2
						10.3394	0
						10.3394	53.69
						10.3561	58.24
						10.3561	0
						10.3561	43.61
						10.3728	3.97
						10.3728	0
						10.3728	3.51
						10.3894	1.64
						10.3894	0
						10.3894	1.6
						10.4061	1.05
						10.4061	0
						10.4061	0.98
						10.4228	27.51
						10.4228	0
						10.4228	15.15
						10.4394	49.22
						10.4394	0
						10.4394	39.93
						10.4561	56.41
						10.4561	0
						10.4561	50.82
						10.4728	47.25
						10.4728	0
						10.4728	54.46
						10.4894	3.17
						10.4894	0
						10.4894	3.18
						10.5061	1.41
						10.5061	0
						10.5061	1.34
						10.5228	0.99
						10.5228	0
						10.5228	2.3
						10.5394	35.23
						10.5394	0
						10.5394	29.24
						10.5561	48.39
						10.5561	0
						10.5561	45.79
						10.5728	55.5
						10.5728	0
						10.5728	53.26
						10.5894	35.5
						10.5894	0
						10.5894	47
						10.6061	2.57
						10.6061	0
						10.6061	2.84
						10.6228	1.25
						10.6228	0
						10.6228	1.31
						10.6394	0.77
						10.6394	0
						10.6394	0.88
						10.6561	34.97
						10.6561	0
						10.6561	28.74
						10.6728	47.04
						10.6728	0
						10.6728	42.75
						10.6894	50.39
						10.6894	0
						10.6894	51.47
						10.7061	21.91
						10.7061	0
						10.7061	33.73
						10.7228	2.06
						10.7228	0
						10.7228	2.27
						10.7394	1.05
						10.7394	0
						10.7394	1.12
						10.7561	5.93
						10.7561	0
						10.7561	0.73
						10.7728	30.52
						10.7728	0
						10.7728	3.9
						10.7894	36.74
						10.7894	0
						10.7894	31.45
						10.8061	45.89
						10.8061	0
						10.8061	46.83
						10.8228	10.3
						10.8228	0
						10.8228	18.06
						10.8394	1.57
						10.8394	0
						10.8394	1.61
						10.8561	0.82
						10.8561	0
						10.8561	0.85
						10.8728	4.09
						10.8728	0
						10.8728	2.98
						10.8894	35.97
						10.8894	0
						10.8894	15.05
						10.9061	44.8
						10.9061	0
						10.9061	28.55
						10.9228	52.31
						10.9228	0
						10.9228	42.95
						10.9394	8.28
						10.9394	0
						10.9394	16.36
						10.9561	1.57
						10.9561	0
						10.9561	1.37
						10.9728	0.8
						10.9728	0
						10.9728	0.67
						10.9894	18.06
						10.9894	0
						10.9894	1.85
						11.0061	38.18
						11.0061	0
						11.0061	24.54
						11.0228	43.77
						11.0228	0
						11.0228	30.97
						11.0394	53.53
						11.0394	0
						11.0394	26.99
						11.0561	5.09
						11.0561	0
						11.0561	9.67
						11.0728	1.47
						11.0728	0
						11.0728	1.18
						11.0894	0.79
						11.0894	0
						11.0894	0.6
						11.1061	21.95
						11.1061	0
						11.1061	3.27
						11.1228	39.47
						11.1228	0
						11.1228	23.14
						11.1394	48.55
						11.1394	0
[truncated: 370 more rows]

## Sheet: Strain 5
Escherichia coli BW25113 ΔfliA
Biomass		Acetate		Glucose		DOT
Time [h]	Values [g/L]	Time [h]	Values [g/L]	Time [h]	Values [g/L]	Time [h]	Values [%]
0.0792	2.69924	0.5603	0.41669	0.5603	3.66497	0.0069	90.86
0.0792	2.66288	0.5603	0.41669	0.5603	3.55488	0.0069	93.25
0.1156	2.29924	0.8592	0.437488	0.8592	1.9424	0.0069	91.92
0.1156	2.28712	0.8592	0.432761	0.8592	1.88023	0.0097	90.95
0.1522	2.40833	1.1567	0.420471	1.1567	0.0100134	0.0097	93.54
0.1522	2.37197	1.1567	0.417635	1.1567	0.00483277	0.0097	91.88
0.5603	3.32727	1.4631	0.454504	1.4631	4.10144	0.0125	91.06
0.5603	3.20606	1.4631	0.433706	1.4631	4.0587	0.0125	93.41
0.8592	3.37576	1.7622	0.434652	1.7622	1.73388	0.0125	91.73
0.8592	3.5697	1.7622	0.422362	1.7622	1.99421	0.0153	91.15
1.1567	3.88485	2.0658	0.356005	2.0658	0.026311	0.0153	93.04
1.1567	3.86061	2.0658	0.349557	2.0658	0.0222933	0.0153	92
1.4631	4.73333	2.4069	0.392276	2.4069	0.0142578	0.0181	91.14
1.4631	4.53939	2.4069	0.39147	2.4069	0.020954	0.0181	92.96
1.7622	5	2.7531	0.128705	2.7531	0.0155971	0.0181	92.19
1.7622	5	2.7531	0.15611	2.7531	0.0142578	0.0219	93.08
2.0658	6.08182	3.1097	0.104525	3.1097	0.0115793	0.0219	94.65
2.0658	6.40909	3.1097	0.0932401	3.1097	0.0155971	0.0219	93.83
2.4069	6.66364	3.4567	0.166589	3.4567	0.0102401	0.0394	90.77
2.4069	6.66364	3.4567	0.190769	3.4567	0.0155971	0.0394	93.02
2.7531	5.82727	3.7817	0.0439397	3.7817	0.0189691	0.0394	91.67
2.7531	6.44545	3.7817	0.0386713	3.7817	0.0177258	0.0572	91.13
3.1097	6.04545	4.1256	0.15563	4.1256	0.0189691	0.0572	92.84
3.1097	5.9	4.1256	0.133503	4.1256	0.0189691	0.0572	91.95
3.4567	7.46364	4.4836	0.112429	4.4836	0.0164826	0.0739	90.91
3.4567	7.5	4.4836	0.116644	4.4836	0.0139961	0.0739	92.97
3.7817	7.86136	4.8667	0.0871409	4.8667	0.0102664	0.0739	92.06
3.7817	7.75227	4.8667	0.101892	4.8667	0.0102664	0.0906	88.52
4.1256	8.73409	5.1833	0.129288	5.1833	0.0139961	0.0906	92.82
4.1256	7.20682	5.1833	0.142986	5.1833	0.0164826	0.0906	91.95
4.4836	9.38864	5.5056	0.224331	5.5056	0.023937	0.1072	90.47
4.4836	9.89773	5.8308	0.206851	5.8308	0.00364714	0.1072	92.86
4.8667	8.40682	6.1489	0.0439678	5.8308	0.0550481	0.1072	91.9
4.8667	7.89773	6.1489	0.142492	6.1489	0.019879	0.1239	90.59
5.1833	7.75227	6.4694	0.170302	6.8183	0.0726327	0.1239	90.35
5.1833	7.46136	6.4694	0.0360223	7.1431	0.0185526	0.1239	92.14
6.1489	7.5	6.8183	0.0598588	7.1431	0.0261757	0.1406	90.48
6.4694	9.28182	6.8183	0.14567	7.4639	0.0236346	0.1406	92.58
6.8183	9.46364	7.1431	0.222562	8.1381	0.0185526	0.1406	91.87
6.8183	9.5	7.4639	0.303978	8.4594	0.00203608	0.1572	90.52
7.1431	5.09773	8.1381	0.319404	12.9364	0.00747716	0.1572	92.48
7.1431	9.78864	8.4594	0.341686	12.9364	0.00874392	0.1572	92
7.4639	10.2614	12.9364	0.381603	12.9711	0.0125442	0.1739	90.72
7.7864	10.7341	12.9364	0.379026	12.9711	0.00114335	0.1739	92.68
8.4594	14.6614	12.9711	0.595485	13.0061	0.00747716	0.1739	92.37
8.4594	12.4795	13.0061	0.659907	13.0061	2.22811	0.1906	91.11
12.9364	15.1023	13.0061	0.670215			0.1906	92.93
12.9711	11.7689					0.1906	92.15
12.9711	12.6174					0.2072	90.93
13.0061	12.072					0.2072	92.93
						0.2072	91.89
						0.2239	90.93
						0.2239	92.88
						0.2239	91.93
						0.2406	91.01
						0.2406	92.65
						0.2406	92.24
						0.2572	91.49
						0.2572	92.96
						0.2572	92.07
						0.2739	91.46
						0.2739	93.12
						0.2739	91.9
						0.2906	91.65
						0.2906	92.82
						0.2906	92.16
						0.3072	91.37
						0.3072	92.68
						0.3072	92.17
						0.3239	88.62
						0.3239	91.3
						0.3239	91.31
						0.3406	71.94
						0.3406	78.72
						0.3406	78.46
						0.3572	64.64
						0.3572	75.14
						0.3572	74.57
						0.3739	64.26
						0.3739	73.7
						0.3739	73.85
						0.3906	62.27
						0.3906	72.52
						0.3906	73.04
						0.4072	61.38
						0.4072	72.71
						0.4072	72.14
						0.4239	61.62
						0.4239	72.03
						0.4239	72.2
						0.4406	60.56
						0.4406	71.82
						0.4406	71.75
						0.4572	60.62
						0.4572	71.45
						0.4572	71.38
						0.4739	60.25
						0.4739	70.82
						0.4739	71.3
						0.4906	59.63
						0.4906	70.79
						0.4906	71.08
						0.5072	58.28
						0.5072	70.69
						0.5072	70.95
						0.5239	59.28
						0.5239	70.16
						0.5239	70.56
						0.5406	59.64
						0.5406	69.75
						0.5406	70.22
						0.5572	58.95
						0.5572	69.55
						0.5572	70.33
						0.5739	57.72
						0.5739	69.3
						0.5739	69.64
						0.5906	57.28
						0.5906	69.1
						0.5906	69.57
						0.6072	55.1
						0.6072	68.96
						0.6072	69.33
						0.6239	57.52
						0.6239	68.37
						0.6239	69.28
						0.6406	58.01
						0.6406	68.57
						0.6406	69.12
						0.6572	58.29
						0.6572	68.15
						0.6572	69.16
						0.6739	57.59
						0.6739	68.11
						0.6739	68.75
						0.6906	57.25
						0.6906	67.92
						0.6906	68.41
						0.7072	55.99
						0.7072	68.11
						0.7072	68.05
						0.7239	55.86
						0.7239	67.58
						0.7239	68.26
						0.7406	56.29
						0.7406	67.21
						0.7406	67.84
						0.7572	56.3
						0.7572	67.02
						0.7572	68.28
						0.7739	56.91
						0.7739	67.22
						0.7739	68.2
						0.7906	57.45
						0.7906	67.17
						0.7906	68.22
						0.8072	57.48
						0.8072	67.49
						0.8072	68.16
						0.8239	57.16
						0.8239	67.2
						0.8239	68.41
						0.8406	57.27
						0.8406	67.39
						0.8406	68.77
						0.8572	58.45
						0.8572	67.09
						0.8572	68.79
						0.8739	57.92
						0.8739	68.14
						0.8739	68.79
						0.8906	58.24
						0.8906	68.2
						0.8906	68.26
						0.9072	57.72
						0.9072	67.82
						0.9072	68.38
						0.9239	57.63
						0.9239	67.92
						0.9239	67.96
						0.9406	57.78
						0.9406	68.19
						0.9406	67.67
						0.9572	56.77
						0.9572	67.63
						0.9572	67.53
						0.9739	57.21
						0.9739	67.33
						0.9739	67.28
						0.9906	55.83
						0.9906	67.13
						0.9906	66.88
						1.0072	55.95
						1.0072	66.71
						1.0072	66.32
						1.0239	55.51
						1.0239	65.73
						1.0239	66.59
						1.0406	55.05
						1.0406	65.67
						1.0406	65.47
						1.0572	53.87
						1.0572	65.5
						1.0572	65.08
						1.0739	53.74
						1.0739	64.96
						1.0739	64.6
						1.0906	52.8
						1.0906	63.9
						1.0906	64.25
						1.1072	52.08
						1.1072	63.88
						1.1072	64.02
						1.1239	51.77
						1.1239	63.38
						1.1239	63.68
						1.1406	51.35
						1.1406	63.23
						1.1406	63.39
						1.1572	50.8
						1.1572	63.35
						1.1572	62.52
						1.1739	50.61
						1.1739	62.34
						1.1739	63.21
						1.1906	50.71
						1.1906	62.19
						1.1906	62.79
						1.2072	49.44
						1.2072	62.28
						1.2072	62.78
						1.2239	49.02
						1.2239	61.84
						1.2239	62.3
						1.2406	49.94
						1.2406	61.53
						1.2406	62.49
						1.2572	50.24
						1.2572	62.12
						1.2572	75.53
						1.2739	49.65
						1.2739	61.19
						1.2739	82.21
						1.2906	49.93
						1.2906	61.34
						1.2906	84.08
						1.3072	66.55
						1.3072	68.61
						1.3072	84.92
						1.3239	76.91
						1.3239	81.15
						1.3239	85.97
						1.3406	80.12
						1.3406	83.78
						1.3406	85.97
						1.3572	80.6
						1.3572	84.57
						1.3572	86.26
						1.3739	82.56
						1.3739	85.89
						1.3739	86.55
						1.3906	82.42
						1.3906	86.82
						1.3906	86.44
						1.4072	83.49
						1.4072	86.67
						1.4072	86.61
						1.4239	78.92
						1.4239	84.22
						1.4239	85.66
						1.4406	57.24
						1.4406	65.64
						1.4406	67.94
						1.4572	51.07
						1.4572	60.75
						1.4572	61.98
						1.4739	46.88
						1.4739	58.17
						1.4739	59.78
						1.4906	44.96
						1.4906	56.83
						1.4906	58.81
						1.5072	44.92
						1.5072	55.99
						1.5072	58.08
						1.5239	44.62
						1.5239	55.2
						1.5239	58.3
						1.5406	43.91
						1.5406	55.57
						1.5406	58.08
						1.5572	43.65
						1.5572	54.94
						1.5572	57.53
						1.5739	43.92
						1.5739	55.44
						1.5739	57.63
						1.5906	43.44
						1.5906	55.05
						1.5906	57.37
						1.6072	43.89
						1.6072	55.39
						1.6072	57.46
						1.6239	42.67
						1.6239	55.35
						1.6239	57.11
						1.6406	42.96
						1.6406	55.15
						1.6406	57.19
						1.6572	42.69
						1.6572	55.01
						1.6572	57.53
						1.6739	42.35
						1.6739	55.73
						1.6739	57.36
						1.6906	42.26
						1.6906	55.22
						1.6906	57.54
						1.7072	42.72
						1.7072	54.97
						1.7072	57.49
						1.7239	42.99
						1.7239	55.13
						1.7239	57.67
						1.7406	43.46
						1.7406	55.16
						1.7406	57.17
						1.7572	41.95
						1.7572	54.82
						1.7572	56.63
						1.7739	41.77
						1.7739	55.39
						1.7739	57
						1.7906	41.22
						1.7906	54.84
						1.7906	56.55
						1.8072	40.65
						1.8072	54.05
						1.8072	56.24
						1.8239	39.68
						1.8239	54.25
						1.8239	56.07
						1.8406	39.65
						1.8406	54.15
						1.8406	55.64
						1.8572	38.5
						1.8572	52.69
						1.8572	55.46
						1.8739	38.48
						1.8739	51.84
						1.8739	54.77
						1.8906	37.79
						1.8906	51.91
						1.8906	54.16
						1.9072	36.87
						1.9072	50.65
						1.9072	53.48
						1.9239	34.18
						1.9239	50.11
						1.9239	52.93
						1.9406	33.58
						1.9406	49.58
						1.9406	51.99
						1.9572	32.51
						1.9572	48.99
						1.9572	51.44
						1.9739	32.11
						1.9739	48.36
						1.9739	50.94
						1.9906	32
						1.9906	47.73
						1.9906	50.42
						2.0072	30.08
						2.0072	47.89
						2.0072	50.11
						2.0239	46.97
						2.0239	47.25
						2.0239	56.28
						2.0406	69.5
						2.0406	46.72
						2.0406	75.78
						2.0572	75.14
						2.0572	58.31
						2.0572	79.87
						2.0739	78.15
						2.0739	76.05
						2.0739	81.64
						2.0906	79.73
						2.0906	78.26
						2.0906	82.76
						2.1072	80.38
						2.1072	79.83
						2.1072	83.54
						2.1239	81.24
						2.1239	82.36
						2.1239	83.72
						2.1406	82.11
						2.1406	83.51
						2.1406	83.81
						2.1572	82.54
						2.1572	84.08
						2.1572	83.97
						2.1739	83.06
						2.1739	83.58
						2.1739	83.97
						2.1906	82.53
						2.1906	84.12
						2.1906	84.15
						2.2072	83.38
						2.2072	84.13
						2.2072	84.35
						2.2239	83.87
						2.2239	84.45
						2.2239	84.43
						2.2406	83.73
						2.2406	84.8
						2.2406	84.24
						2.2572	84.01
						2.2572	84.28
						2.2572	84.34
						2.2739	83.71
						2.2739	84.72
						2.2739	83.91
						2.2906	83.7
						2.2906	84.65
						2.2906	84.14
						2.3072	83.9
						2.3072	84.44
						2.3072	83.88
						2.3239	84.01
						2.3239	84.11
						2.3239	83.5
						2.3406	83.9
						2.3406	84.76
						2.3406	83.14
						2.3572	84.04
						2.3572	84.06
						2.3572	83.03
						2.3739	83.84
						2.3739	84.19
						2.3739	82.54
						2.3906	83.75
						2.3906	83.82
						2.3906	82.74
						2.4072	83.67
						2.4072	84.03
						2.4072	86.95
						2.4239	83.57
						2.4239	83.25
						2.4239	88.29
						2.4406	83.5
						2.4406	82.7
						2.4406	88.75
						2.4572	83.93
						2.4572	82.85
						2.4572	89
						2.4739	84.04
						2.4739	87.25
						2.4739	89.09
						2.4906	83.56
						2.4906	88.66
						2.4906	89.31
						2.5072	83.77
						2.5072	89.33
						2.5072	89.54
						2.5239	83.79
						2.5239	89.83
						2.5239	89.6
						2.5406	83.89
						2.5406	89.52
						2.5406	89.95
						2.5572	83.85
						2.5572	89.98
						2.5572	89.89
						2.5739	83.36
						2.5739	90.09
						2.5739	90.33
						2.5906	83.1
						2.5906	90.7
						2.5906	90.15
						2.6072	73.52
						2.6072	80.93
						2.6072	85.96
						2.6239	39.32
						2.6239	58.88
						2.6239	62.65
						2.6406	28.9
						2.6406	51.36
						2.6406	54.13
						2.6572	49.22
						2.6572	75.52
						2.6572	66.43
						2.6739	73.59
						2.6739	81.76
						2.6739	80.29
						2.6906	77.41
						2.6906	85.62
						2.6906	82.99
						2.7072	77.06
						2.7072	86.95
						2.7072	86
						2.7239	48.7
						2.7239	59.98
						2.7239	64.17
						2.7406	26.85
						2.7406	47.31
						2.7406	49.61
						2.7572	23.88
						2.7572	46
						2.7572	47.03
						2.7739	60.17
						2.7739	74.88
						2.7739	69.32
						2.7906	73.62
						2.7906	79.74
						2.7906	78.79
						2.8072	75.96
						2.8072	81.4
						2.8072	78.76
						2.8239	63.32
						2.8239	73.13
						2.8239	76.38
						2.8406	32.48
						2.8406	50.36
						2.8406	53.11
						2.8572	33.52
						2.8572	59.81
						2.8572	49.39
						2.8739	67.96
						2.8739	77.53
						2.8739	74.94
						2.8906	74.34
						2.8906	80.65
						2.8906	78.64
						2.9072	73.1
						2.9072	83.55
						2.9072	83.75
						2.9239	71.66
						2.9239	85.87
						2.9239	85.41
						2.9406	72.24
						2.9406	86.63
						2.9406	86.02
						2.9572	47.41
						2.9572	61.03
						2.9572	64.46
						2.9739	27.43
						2.9739	47.06
						2.9739	50.01
						2.9906	29.62
						2.9906	55.42
						2.9906	48.17
						3.0072	65.04
						3.0072	75.28
						3.0072	73.27
						3.0239	71.42
						3.0239	76.83
						3.0239	76.81
						3.0406	69.68
						3.0406	82.34
						3.0406	81.05
						3.0572	69.38
						3.0572	85.08
						3.0572	84.18
						3.0739	51.1
						3.0739	65.53
						3.0739	68.54
						3.0906	27.51
						3.0906	47.27
						3.0906	48.87
						3.1072	34.4
						3.1072	48.3
						3.1072	43.4
						3.1239	65.74
						3.1239	73.3
						3.1239	70.57
						3.1406	71.45
						3.1406	76.7
						3.1406	75.3
						3.1572	71.92
						3.1572	82.74
						3.1572	80.33
						3.1739	76.42
						3.1739	83.08
						3.1739	83.12
						3.1906	39.72
						3.1906	54.18
						3.1906	57.89
						3.2072	24.88
						3.2072	43.86
						3.2072	46.45
						3.2239	31.66
						3.2239	58.16
						3.2239	43.7
						3.2406	64.13
						3.2406	73.07
						3.2406	71.26
						3.2572	69.75
						3.2572	74.94
						3.2572	74.88
						3.2739	67.34
						3.2739	82.28
						3.2739	79.78
						3.2906	73.86
						3.2906	84.2
						3.2906	83.17
						3.3072	66.29
						3.3072	78.84
						3.3072	81.47
						3.3239	29.87
						3.3239	48.41
						3.3239	51.05
						3.3406	21.41
						3.3406	48.46
						3.3406	43.54
						3.3572	58.55
						3.3572	72.26
						3.3572	70.01
						3.3739	67.83
						3.3739	78.57
						3.3739	74.03
						3.3906	70.29
						3.3906	81.7
						3.3906	80.5
						3.4072	73.3
						3.4072	83.03
						3.4072	82.48
						3.4239	51.92
						3.4239	66.43
						3.4239	70.48
						3.4406	23.9
						3.4406	44.15
						3.4406	47.25
						3.4572	23.7
						3.4572	48.3
						3.4572	40.57
						3.4739	54.8
						3.4739	71.02
						3.4739	68.73
						3.4906	56.8
						3.4906	77.26
						3.4906	72.94
						3.5072	64.24
						3.5072	82.11
						3.5072	79.55
						3.5239	66.52
						3.5239	79.85
						3.5239	81.89
						3.5406	28.73
						3.5406	46.01
						3.5406	48.52
						3.5572	19.14
						3.5572	40.84
						3.5572	40.84
						3.5739	55.9
						3.5739	69.92
						3.5739	65.47
						3.5906	64.94
						3.5906	76.15
						3.5906	72.03
						3.6072	62.86
						3.6072	81.51
						3.6072	79.75
						3.6239	70.79
						3.6239	82.8
						3.6239	81.85
						3.6406	51.7
						3.6406	66.12
						3.6406	69.91
						3.6572	22.82
						3.6572	43.21
						3.6572	45.33
						3.6739	14.23
						3.6739	35.08
						3.6739	39.03
						3.6906	49.39
						3.6906	63.55
						3.6906	58.93
						3.7072	62.6
						3.7072	70.17
						3.7072	70.16
						3.7239	60.78
						3.7239	78.56
						3.7239	72.14
						3.7406	53.92
						3.7406	70.28
						3.7406	73.35
						3.7572	20.08
						3.7572	40.99
						3.7572	44.61
						3.7739	11
						3.7739	34.58
						3.7739	38.09
						3.7906	52.75
						3.7906	66.2
						3.7906	61.37
						3.8072	61.69
						3.8072	70.11
						3.8072	69.97
						3.8239	65.7
						3.8239	79.07
						3.8239	76.7
						3.8406	72.36
						3.8406	80.68
						3.8406	80.15
						3.8572	25.58
						3.8572	44.36
						3.8572	47.99
						3.8739	15.07
						3.8739	35.09
						3.8739	38.27
						3.8906	36.89
						3.8906	55.5
						3.8906	48.66
						3.9072	58.91
						3.9072	67.9
						3.9072	66.24
						3.9239	56.51
						3.9239	75.65
						3.9239	69.75
						3.9406	65.49
						3.9406	79.65
						3.9406	78.71
						3.9572	62.24
						3.9572	77.18
						3.9572	80.76
						3.9739	21.27
						3.9739	41.47
						3.9739	44.72
						3.9906	10.58
						3.9906	33
						3.9906	37.37
						4.0072	38.66
						4.0072	55.84
						4.0072	40.9
						4.0239	57.9
						4.0239	66.34
						4.0239	67.28
						4.0406	58.68
						4.0406	74.16
						4.0406	67.1
						4.0572	66.29
						4.0572	78.74
						4.0572	77.17
						4.0739	70.68
						4.0739	81.54
						4.0739	80.88
						4.0906	53.26
						4.0906	68.19
						4.0906	73.04
						4.1072	16.8
						4.1072	38.16
						4.1072	39.91
						4.1239	8.91
						4.1239	32.6
						4.1239	34.85
						4.1406	45.68
						4.1406	63.22
						4.1406	51.45
						4.1572	56.51
						4.1572	66.38
						4.1572	65.66
						4.1739	64.08
						4.1739	76.79
						4.1739	72.34
						4.1906	70.7
						4.1906	78.79
						4.1906	77.78
						4.2072	32.36
						4.2072	46.96
						4.2072	52.67
						4.2239	12.46
						4.2239	34.2
						4.2239	36.81
						4.2406	40.42
						4.2406	58.47
						4.2406	52.7
						4.2572	57.24
						4.2572	70.5
						4.2572	66.69
						4.2739	65.94
						4.2739	76.75
						4.2739	75.65
						4.2906	67.36
						4.2906	78.15
						4.2906	78.89
						4.3072	69.01
						4.3072	80.89
						4.3072	80.61
						4.3239	73.41
						4.3239	82
						4.3239	82.05
						4.3406	22.41
						4.3406	41.42
						4.3406	45.39
						4.3572	8.54
						4.3572	31.73
						4.3572	34.56
						4.3739	43.51
						4.3739	55.79
						4.3739	50.65
						4.3906	53.72
						4.3906	65.85
						4.3906	64.45
						4.4072	64.71
						4.4072	75.53
						4.4072	74.91
						4.4239	67.27
						4.4239	77.82
						4.4239	78.83
						4.4406	70.11
						4.4406	80.39
						4.4406	80.69
						4.4572	21.24
						4.4572	41.78
						4.4572	44.32
						4.5056	9.24
						4.5056	31.7
						4.5056	35.06
						4.5136	52.17
						4.5136	67.13
						4.5136	62.65
						4.5303	66.51
						4.5303	75.06
						4.5303	74.39
						4.5469	71.03
						4.5469	77.85
						4.5469	78.36
						4.5636	74.35
						4.5636	80.08
						4.5636	80.73
						4.5803	43.05
						4.5803	56.41
						4.5803	61.62
						4.5969	14.28
						4.5969	34.81
						4.5969	35.45
						4.6136	8.39
						4.6136	27.92
						4.6136	32.01
						4.6303	48.13
						4.6303	61.59
						4.6303	56.44
						4.6469	51.21
						4.6469	67.05
						4.6469	60.69
						4.6636	63.47
						4.6636	74.71
						4.6636	73.68
						4.6803	70.48
						4.6803	77.98
						4.6803	77.9
						4.6969	73.01
						4.6969	81.04
						4.6969	80.57
						4.7136	76.28
						4.7136	82.08
						4.7136	82.28
						4.7303	33.42
						4.7303	49.55
						4.7303	53.93
						4.7469	13.44
						4.7469	35.29
						4.7469	35.99
						4.7636	24.95
						4.7636	32.76
						4.7636	32.8
						4.7803	51.91
						4.7803	63.5
						4.7803	61.65
						4.7969	60.93
						4.7969	70.61
						4.7969	68.38
						4.8136	65.12
						4.8136	76.45
						4.8136	75.98
						4.8303	54.26
						4.8303	71.8
						4.8303	76.67
						4.8469	12.57
						4.8469	34.46
						4.8469	35.05
						4.8636	6.57
						4.8636	26.72
						4.8636	29.04
						4.8803	39.58
						4.8803	52.23
						4.8803	43.53
						4.8969	49.9
						4.8969	61.38
						4.8969	60.81
						4.9136	61.72
						4.9136	72.8
						4.9136	71.58
						4.9303	58.75
						4.9303	70.51
						4.9303	76.44
						4.9469	9.61
						4.9469	32.99
						4.9469	35.05
						4.9636	5.1
						4.9636	26.13
						4.9636	29.32
						4.9803	22.59
						4.9803	25.93
						4.9803	28.84
						4.9969	45.53
						4.9969	58.45
						4.9969	59.72
						5.0136	44.43
						5.0136	60.13
						5.0136	65.93
						5.0303	62.78
						5.0303	73.99
						5.0303	73.89
						5.0469	37.67
						5.0469	53.89
						5.0469	59.81
						5.0636	8.18
						5.0636	29.96
						5.0636	31.6
						5.0803	5.95
						5.0803	24.74
						5.0803	28.02
						5.0969	38.07
						5.0969	43.28
						5.0969	44.03
						5.1136	44.2
						5.1136	58.59
						5.1136	59.02
						5.1303	50.43
						5.1303	68.21
						5.1303	69.3
						5.1469	47.3
						5.1469	66.75
						5.1469	72.92
						5.1636	7.81
						5.1636	30.16
						5.1636	32.22
						5.1803	4.65
						5.1803	23.88
						5.1803	26.95
						5.1969	23.73
						5.1969	35.32
						5.1969	28.52
						5.2136	47.99
						5.2136	57.84
						5.2136	56.61
						5.2303	46.55
						5.2303	66.79
						5.2303	66.92
						5.2469	63.66
						5.2469	73.43
						5.2469	73.67
						5.2636	14.22
						5.2636	34.65
						5.2636	36.74
						5.2803	6.42
						5.2803	26.35
						5.2803	28.89
						5.2969	3.9
						5.2969	19.78
						5.2969	21.64
						5.3136	31.95
						5.3136	43.29
						5.3136	33.64
						5.3303	43.31
						5.3303	57.05
						5.3303	56.37
						5.3469	42.77
						5.3469	66.44
						5.3469	66.78
						5.3636	48.04
						5.3636	66.87
						5.3636	70.56
						5.3803	5.39
						5.3803	23.83
						5.3803	26.02
						5.3969	2.86
						5.3969	15.91
						5.3969	23.53
						5.4136	2.37
						5.4136	11.37
						5.4136	17.3
						5.4303	35.05
						5.4303	48.28
						5.4303	45.54
						5.4469	38.21
						5.4469	49.59
						5.4469	52.02
						5.4636	40.43
						5.4636	67.57
						5.4636	49.87
						5.4803	4.36
						5.4803	20.36
						5.4803	19.26
						5.4969	2.1
						5.4969	13.72
						5.4969	20.51
						5.5136	1.11
						5.5136	8.38
						5.5136	14.52
						5.5303	25.48
						5.5303	37.5
						5.5303	17.9
						5.5469	44.1
						5.5469	48.39
						5.5469	51.25
						5.5636	43.08
						5.5636	61.51
						5.5636	63.18
						5.5803	4.29
						5.5803	18.22
						5.5803	27.82
						5.5969	1.85
						5.5969	11.53
						5.5969	14.37
						5.6136	0.87
						5.6136	5.7
						5.6136	13.39
						5.6303	20.47
						5.6303	25.66
						5.6303	12.35
						5.6469	40.45
						5.6469	45.31
						5.6469	44.21
						5.6636	40.35
						5.6636	57.87
						5.6636	54.69
						5.6803	52.17
						5.6803	64.19
						5.6803	65.4
						5.6969	5.49
						5.6969	16.24
						5.6969	24.13
						5.7136	1.67
						5.7136	7.81
						5.7136	13.01
						5.7303	0.89
						5.7303	5.1
						5.7303	7.64
						5.7469	19.29
						5.7469	20.33
						5.7469	21.53
						5.7636	38.51
						5.7636	42.03
						5.7636	46.2
						5.7803	38.6
						5.7803	44.5
						5.7803	60.96
						5.7969	16.01
						5.7969	34.36
						5.7969	46.31
						5.8136	1.82
						5.8136	5.83
						5.8136	10.18
						5.8303	1.07
						5.8303	4.74
						5.8303	9.91
						5.8469	7.53
						5.8469	3.36
						5.8469	4.54
						5.8636	38.03
						5.8636	36.66
						5.8636	39.25
						5.8803	39.48
						5.8803	40.99
						5.8803	52.86
						5.8969	23.36
						5.8969	37.65
						5.8969	48.73
						5.9136	1.9
						5.9136	5.45
						5.9136	10.66
						5.9303	0.95
						5.9303	4.48
						5.9303	10.97
						5.9469	5.19
						5.9469	3.29
						5.9469	6.09
						5.9636	36.04
						5.9636	34.06
						5.9636	36.4
						5.9803	35.29
						5.9803	37.26
						5.9803	48.49
						5.9969	52.68
						5.9969	59.95
						5.9969	62.28
						6.0136	8.93
						6.0136	20.98
						6.0136	29.64
						6.0303	1.82
						6.0303	5.08
						6.0303	8.48
						6.0469	0.94
						6.0469	3.24
						6.0469	9.34
						6.0636	14.53
						6.0636	7.24
						6.0636	17.79
						6.0803	34.43
						6.0803	34.95
						6.0803	41.49
						6.0969	40.78
						6.0969	40.79
						6.0969	58.69
						6.1136	20.58
						6.1136	36.69
						6.1136	47.76
						6.1303	1.92
						6.1303	3.97
						6.1303	7.92
						6.1469	0.95
						6.1469	2.9
						6.1469	8.22
						6.1636	5.68
						6.1636	4.96
						6.1636	6.35
						6.1803	26.46
						6.1803	30.02
						6.1803	40.24
						6.1969	45.88
						6.1969	41.8
						6.1969	56.69
						6.2136	28.22
						6.2136	44.06
						6.2136	55.09
						6.2303	1.99
						6.2303	3.78
						6.2303	7.92
						6.2469	0.97
						6.2469	2.55
						6.2469	4.93
						6.2636	4.37
						6.2636	4.72
						6.2636	3.74
						6.2803	28.25
						6.2803	29.01
						6.2803	28
						6.2969	48.6
						6.2969	47.8
						6.2969	54.04
						6.3136	55.07
						6.3136	58.35
						6.3136	58.37
						6.3303	11.45
						6.3303	23.11
						6.3303	36.23
						6.3469	1.99
						6.3469	3.3
						6.3469	14.89
						6.3636	1.01
						6.3636	2.11
						6.3636	13.67
						6.3803	3.76
						6.3803	6.48
						6.3803	12.62
						6.3969	24.03
						6.3969	31.39
						6.3969	7.64
						6.4136	48
						6.4136	54.12
						6.4136	43.8
						6.4303	48.78
						6.4303	59.21
						6.4303	56.22
						6.4469	2.42
						6.4469	6.41
						6.4469	8.21
						6.4636	1.08
						6.4636	2.12
						6.4636	4.68
						6.4803	0.91
						6.4803	1.34
						6.4803	3.7
						6.4969	7.85
						6.4969	10.57
						6.4969	10.72
						6.5136	42.67
						6.5136	44.32
						6.5136	50.06
						6.5303	51.22
						6.5303	55.53
						6.5303	36.49
						6.5469	10.99
						6.5469	24.71
						6.5469	34
						6.5636	1.79
						6.5636	4.96
						6.5636	13.04
						6.5803	0.88
						6.5803	2.42
						6.5803	5.95
						6.5969	1.79
						6.5969	1.83
						6.5969	1.92
						6.6136	27
						6.6136	14.05
						6.6136	1.09
						6.6303	48.76
						6.6303	44.31
						6.6303	4.12
						6.6469	52.19
						6.6469	56.17
						6.6469	42.22
						6.6636	6.97
						6.6636	11.95
						6.6636	22.09
						6.6803	1.73
						6.6803	2.41
						6.6803	10.95
						6.6969	0.81
						6.6969	1.62
						6.6969	5.11
						6.7136	4.32
						6.7136	7.07
						6.7136	1.84
						6.7303	36.33
						6.7303	36.82
						6.7303	29.94
						6.7469	51.98
						6.7469	55.4
						6.7469	57.16
						6.7636	17.47
						6.7636	31.95
						6.7636	43.9
						6.7803	1.81
						6.7803	3.62
						6.7803	4.51
						6.7969	0.87
						6.7969	1.57
						6.7969	2.54
						6.8136	3.34
						6.8136	3.78
						6.8136	1.57
						6.8303	25.93
						6.8303	22.21
						6.8303	19.38
						6.8469	44.99
						6.8469	50.24
						6.8469	49.2
						6.8636	53.65
						6.8636	56.5
						6.8636	49.77
						6.8803	58.72
						6.8803	60.45
						6.8803	49.3
						6.8969	5.05
						6.8969	10.24
						6.8969	19.96
						6.9136	1.62
						6.9136	2.6
						6.9136	3.54
						6.9303	0.96
						6.9303	1.49
						6.9303	2.55
						6.9469	23.14
						6.9469	3.82
						6.9469	16.08
						6.9636	36.08
						6.9636	31.65
						6.9636	38.14
						6.9803	51.08
						6.9803	52.49
						6.9803	55.55
						6.9969	59.44
						6.9969	57.23
						6.9969	64.18
						7.0136	3.12
						7.0136	5.03
						7.0136	11.37
						7.0303	1.22
						7.0303	1.87
						7.0303	2.55
						7.0469	2.79
						7.0469	2.02
						7.0469	1.36
						7.0636	33.7
						7.0636	18.34
						7.0636	13.11
						7.0803	37.76
						7.0803	38.82
						7.0803	40.07
						7.0969	35.63
						7.0969	53.74
						7.0969	57.62
						7.1136	4.41
						7.1136	8.14
						7.1136	17.43
						7.1303	1.2
						7.1303	2.15
						7.1303	2.46
						7.1469	0.6
						7.1469	1.22
						7.1469	1.37
						7.1636	19.82
						7.1636	6.41
						7.1636	15.44
						7.1803	35.79
						7.1803	30.71
						7.1803	38.38
						7.1969	34.93
						7.1969	50.16
						7.1969	59.12
						7.2136	5.17
						7.2136	11.64
						7.2136	24.56
						7.2303	1.12
						7.2303	2.05
						7.2303	2.89
						7.2469	0.49
						7.2469	1.1
						7.2469	1.49
						7.2636	27.57
						7.2636	5.71
						7.2636	1.04
						7.2803	40.24
						7.2803	36.69
						7.2803	12.45
						7.2969	39.52
						7.2969	36.16
						7.2969	46.5
						7.3136	58.81
						7.3136	57.66
						7.3136	60.34
						7.3303	5.2
						7.3303	8.72
						7.3303	16.3
						7.3469	1.42
						7.3469	2.16
						7.3469	2.34
						7.3636	3.83
						7.3636	1.2
						7.3636	1.15
						7.3803	36.08
						7.3803	22.45
						7.3803	24.45
						7.3969	40.19
						7.3969	38.88
						7.3969	39.03
						7.4136	38.5
						7.4136	45.59
						7.4136	57.3
						7.4303	8.11
						7.4303	22.49
						7.4303	35.76
						7.4469	1.43
						7.4469	2.47
						7.4469	3.17
						7.4636	0.63
						7.4636	1.29
						7.4636	1.4
						7.4803	20.67
						7.4803	8.07
						7.4803	16.24
						7.4969	36.06
						7.4969	36.27
						7.4969	36.41
						7.5136	36.55
						7.5136	35.44
						7.5136	55.13
						7.5303	21.1
						7.5303	42.69
						7.5303	57.9
						7.5469	1.39
						7.5469	2.78
						7.5469	3.69
						7.5636	0.6
						7.5636	1.26
						7.5636	1.46
						7.5803	22.36
						7.5803	5.05
						7.5803	6.42
						7.5969	39.43
						7.5969	35.31
						7.5969	34.51
						7.6136	41.81
						7.6136	36.89
						7.6136	51.57
						7.6303	42.4
						7.6303	57.03
						7.6303	61.88
						7.6469	13.96
						7.6469	23.43
						7.6469	36.51
						7.6636	1.63
						7.6636	2.67
						7.6636	3.16
						7.6803	0.74
						7.6803	1.29
						7.6803	1.46
						7.6969	33.27
						7.6969	14.67
						7.6969	9.18
						7.7136	40.69
						7.7136	38.2
						7.7136	38.59
						7.7303	40.63
						7.7303	37.4
						7.7303	46.97
						7.7469	33.6
						7.7469	59.16
						7.7469	60.9
						7.7636	1.8
						7.7636	3.31
						7.7636	3.29
						7.7803	0.75
						7.7803	1.43
						7.7803	1.39
						7.7969	19.51
						7.7969	2.15
						7.7969	1
						7.8136	35.74
						7.8136	16.3
						7.8136	0.96
						7.8303	36.95
						7.8303	36.82
						7.8303	14.55
						7.8469	37.47
						7.8469	51.36
						7.8469	49.17
						7.8636	46.22
						7.8636	62.49
						7.8636	61.02
						7.8803	41.38
						7.8803	68.27
						7.8803	69.4
						7.8969	2.25
						7.8969	4.49
						7.8969	5.74
						7.9136	0.92
						7.9136	1.95
						7.9136	1.78
						7.9303	19.1
						7.9303	1.16
						7.9303	0.99
						7.9469	39.18
						7.9469	0.75
						7.9469	0.59
						7.9636	40.67
						7.9636	25.78
						7.9636	7.34
						7.9803	41.76
						7.9803	25.97
						7.9803	26.32
						7.9969	26.11
						7.9969	32.6
						7.9969	36.86
						8.0136	1.72
						8.0136	2.08
						8.0136	1.74
						8.0303	0.79
						8.0303	0.89
						8.0303	0.67
						8.0469	29.83
						8.0469	4.77
						8.0469	2.57
						8.0636	38.19
						8.0636	25.25
						8.0636	20.27
						8.0803	39.42
						8.0803	35.46
						8.0803	33.63
						8.0969	38.13
						8.0969	51.67
						8.0969	54.46
						8.1136	2.22
						8.1136	3.46
						8.1136	4.15
						8.1303	0.84
						8.1303	1.24
						8.1303	1.24
						8.1469	13.19
						8.1469	0.77
						8.1469	0.8
						8.1636	31.23
						8.1636	0.58
						8.1636	14.59
						8.1803	38.81
						8.1803	0.49
						8.1803	37.88
						8.1969	38.75
						8.1969	37.59
						8.1969	47.3
						8.2136	2.5
						8.2136	2.57
						8.2136	4.75
						8.2303	0.85
						8.2303	0.73
						8.2303	1.32
						8.2469	5.23
						8.2469	0.37
						8.2469	0.64
						8.2636	31.15
						8.2636	0.29
						8.2636	1.82
						8.2803	37.22
						8.2803	11.22
						8.2803	12.13
						8.2969	35.92
						8.2969	22.04
						8.2969	27.51
						8.3136	38.45
						8.3136	19.38
						8.3136	40.44
						8.3303	2.09
						8.3303	1.69
						8.3303	3.13
						8.3469	0.75
						8.3469	0.48
						8.3469	0.84
						8.3636	12.5
						8.3636	0.19
						8.3636	0.35
						8.3803	34.57
						8.3803	0.08
						8.3803	2.5
						8.3969	37.24
						8.3969	17.62
						8.3969	27.59
						8.4136	37.93
						8.4136	30.34
						8.4136	22.9
						8.4303	3.14
						8.4303	2.53
						8.4303	2.61
						8.4469	0.9
						8.4469	0.69
						8.4469	0.62
						8.4636	0.39
						8.4636	0.28
						8.4636	0.23
						8.4803	31.08
						8.4803	1.11
						8.4803	0.06
						8.4969	37.12
						8.4969	1.94
						8.4969	0
						8.5136	38.03
						8.5136	14.46
						8.5136	0
						8.5303	11.04
						8.5303	1.44
						8.5303	0
						8.5469	1.27
						8.5469	0.23
						8.5469	0
						8.5636	0.5
						8.5636	0.02
						8.5636	0
						8.5803	27.59
						8.5803	0
						8.5803	0
						8.7142	0
						8.7142	0
						8.7142	0
						8.7169	0
						8.7169	0
						8.7169	0
						8.7208	0.01
						8.7208	0
						8.7208	0
						8.7383	54.36
						8.7383	0
						8.7383	4.04
						8.7561	59.67
						8.7561	20.08
						8.7561	22.85
						8.7728	65.6
						8.7728	35.48
						8.7728	33.94
						8.7894	64.83
						8.7894	17.76
						8.7894	24.98
						8.8061	70.15
						8.8061	21.88
						8.8061	14.56
						8.8228	70.3
						8.8228	9.2
						8.8228	37.76
						8.8394	70.59
						8.8394	4.09
						8.8394	31.28
						8.8561	68.84
						8.8561	24.15
						8.8561	68.4
						8.8728	70.55
						8.8728	29.32
						8.8728	60.46
						8.8894	70.22
						8.8894	16.69
						8.8894	51.18
						8.9061	75.69
						8.9061	39.93
						8.9061	50.86
						8.9228	74.12
						8.9228	51.43
						8.9228	45.04
						8.9394	64.03
						8.9394	37.9
						8.9394	37.22
						8.9561	77.32
						8.9561	26.55
						8.9561	42.15
						8.9728	79.35
						8.9728	25.69
						8.9728	40.32
						8.9894	80.95
						8.9894	20.79
						8.9894	34.02
						9.0061	82.23
						9.0061	18.79
						9.0061	29.39
						9.0228	81.7
						9.0228	55.67
						9.0228	24.25
						9.0394	81.84
						9.0394	47.92
						9.0394	21.62
						9.0561	83.57
						9.0561	39.47
						9.0561	60.25
						9.0728	83.6
						9.0728	32.54
						9.0728	54.96
						9.0894	84.51
						9.0894	31.02
						9.0894	50.07
						9.1061	80.92
						9.1061	23.61
						9.1061	45.26
						9.1228	84.87
						9.1228	16.28
						9.1228	42.54
						9.1394	85.1
						9.1394	14.23
						9.1394	38.16
						9.1561	84.56
						9.1561	7.43
						9.1561	36.03
						9.1728	83.98
						9.1728	1.24
						9.1728	31.56
						9.1894	80.56
						9.1894	0.56
						9.1894	27.3
						9.2061	83.98
						9.2061	0.31
						9.2061	23.2
						9.2228	86.51
						9.2228	0.13
						9.2228	20.84
						9.2394	86.11
						9.2394	0.05
						9.2394	16.86
						9.2561	86.61
						9.2561	33.77
						9.2561	11.91
						9.2728	86.72
						9.2728	29.58
						9.2728	9.34
						9.2894	86.66
						9.2894	23.32
						9.2894	50.58
						9.3061	86.6
						9.3061	21.54
						9.3061	78.95
						9.3228	84.05
						9.3228	16.43
						9.3228	74.84
						9.3394	86.92
						9.3394	24.08
						9.3394	70.37
						9.3561	87.28
						9.3561	52.32
						9.3561	68.71
						9.3728	87.27
						9.3728	49.35
						9.3728	64.79
						9.3894	87.66
						9.3894	49.56
						9.3894	74.36
						9.4061	87.27
						9.4061	45.48
						9.4061	83.76
						9.4228	87.54
						9.4228	40.93
						9.4228	84.22
						9.4394	85.12
						9.4394	37.26
						9.4394	80.93
						9.4561	86.83
						9.4561	31.82
						9.4561	77.85
						9.4728	87.58
						9.4728	29.18
						9.4728	82.08
						9.4894	86.14
						9.4894	26.51
						9.4894	88.4
						9.5061	87.34
						9.5061	22.11
						9.5061	88.41
						9.5228	87.57
						9.5228	18.85
						9.5228	88.8
						9.5394	77.24
						9.5394	14.52
						9.5394	88.19
						9.5561	9.28
						9.5561	1.69
						9.5561	9.04
						9.5728	3.43
						9.5728	0.88
						9.5728	3.51
						9.5894	30.63
						9.5894	0.48
						9.5894	2.27
						9.6061	42.75
						9.6061	0.3
						9.6061	1.62
						9.6228	43.99
						9.6228	0.17
						9.6228	1.19
						9.6394	62.81
						9.6394	0.05
						9.6394	0.88
						9.6561	38.8
						9.6561	0
						9.6561	0.66
						9.6728	3.4
						9.6728	0
						9.6728	0.5
						9.6894	2.01
						9.6894	0
						9.6894	0.4
						9.7061	2.04
						9.7061	0
						9.7061	0.3
						9.7228	21.93
						9.7228	0
						9.7228	0.22
						9.7394	5.64
						9.7394	0
						9.7394	0.19
						9.7561	14.07
						9.7561	0
						9.7561	0.13
						9.7728	1.33
						9.7728	0
						9.7728	0.1
						9.7894	0.83
						9.7894	0
						9.7894	0.06
						9.8061	0.61
						9.8061	0
						9.8061	0.01
						9.8228	0.46
						9.8228	0
						9.8228	0
						9.8394	0.34
						9.8394	0
						9.8394	0
						9.8561	6.96
						9.8561	0
						9.8561	0
						9.8728	0.37
						9.8728	0
						9.8728	0
						9.8894	0.14
						9.8894	0
						9.8894	0
						9.9061	0.05
						9.9061	0
						9.9061	0
						9.9228	0
						9.9228	0
						9.9228	0
						9.9394	0
						9.9394	0
						9.9394	0
						9.9561	0
						9.9561	0
						9.9561	0
						9.9728	0
						9.9728	0
						9.9728	0
						9.9894	0
						9.9894	0
						9.9894	0
						10.0061	0
						10.0061	0
						10.0061	0
						10.0228	0
						10.0228	0
						10.0228	0
						10.0394	0
						10.0394	0
						10.0394	0
						10.0561	0
						10.0561	0
						10.0561	0
						10.0728	0
						10.0728	0
						10.0728	0
						10.0894	0
						10.0894	0
						10.0894	0
						10.1061	0
						10.1061	0
						10.1061	0
						10.1228	0
						10.1228	0
						10.1228	0
						10.1394	0
						10.1394	0
						10.1394	0
						10.1561	0
						10.1561	0
						10.1561	0
						10.1728	0
						10.1728	0
						10.1728	0
						10.1894	0
						10.1894	0
						10.1894	0
						10.2061	0
						10.2061	0
						10.2061	0
						10.2228	0
						10.2228	0
						10.2228	0
						10.2397	0
						10.2397	0
						10.2397	0
						10.2561	0
						10.2561	0
						10.2561	0
						10.2728	0
						10.2728	0
						10.2728	0
						10.2894	0
						10.2894	0
						10.2894	0
						10.3061	0
						10.3061	0
						10.3061	0
						10.3228	0
						10.3228	0
						10.3228	0
						10.3394	0
						10.3394	0
						10.3394	0
						10.3561	0
						10.3561	0
						10.3561	0
						10.3728	0
						10.3728	0
						10.3728	0
						10.3894	0
						10.3894	0
						10.3894	0
						10.4061	0
						10.4061	0
						10.4061	0
						10.4228	0
						10.4228	0
						10.4228	0
						10.4394	0
						10.4394	0
						10.4394	0
						10.4561	0
						10.4561	0
						10.4561	0
						10.4728	0
						10.4728	0
						10.4728	0
						10.4894	0
						10.4894	0
						10.4894	0
						10.5061	0
						10.5061	0
						10.5061	0
						10.5228	0
						10.5228	0
						10.5228	0
						10.5394	0
						10.5394	0
						10.5394	0
						10.5561	0
						10.5561	0
						10.5561	0
						10.5728	0
						10.5728	0
						10.5728	0
						10.5894	0
						10.5894	0
						10.5894	0
						10.6061	0
						10.6061	0
						10.6061	0
						10.6228	0
						10.6228	0
						10.6228	0
						10.6394	0
						10.6394	0
						10.6394	0
						10.6561	0
						10.6561	0
						10.6561	0
						10.6728	0
						10.6728	0
						10.6728	0
						10.6894	0
						10.6894	0
						10.6894	0
						10.7061	0
						10.7061	0
						10.7061	0
						10.7228	0
						10.7228	0
						10.7228	0
						10.7394	0
						10.7394	0
						10.7394	0
						10.7561	0
						10.7561	0
						10.7561	0
						10.7728	0
						10.7728	0
						10.7728	0
						10.7894	0
						10.7894	0
						10.7894	0
						10.8061	0
						10.8061	0
						10.8061	0
						10.8228	0
						10.8228	0
						10.8228	0
						10.8394	0
						10.8394	0
						10.8394	0
						10.8561	0
						10.8561	0
						10.8561	0
						10.8728	0
						10.8728	0
						10.8728	0
						10.8894	0
						10.8894	0
						10.8894	0
						10.9061	0
						10.9061	0
						10.9061	0
						10.9228	0
						10.9228	0
						10.9228	0
						10.9394	0
						10.9394	0
						10.9394	0
						10.9561	0
						10.9561	0
						10.9561	0
						10.9728	0
						10.9728	0
						10.9728	0
						10.9894	0
						10.9894	0
						10.9894	0
						11.0061	0
						11.0061	0
						11.0061	0
						11.0228	0
						11.0228	0
						11.0228	0
						11.0394	0
						11.0394	0
						11.0394	0
						11.0561	0
						11.0561	0
						11.0561	0
						11.0728	0
						11.0728	0
						11.0728	0.01
						11.0894	0
						11.0894	0
						11.0894	6.48
						11.1061	0
						11.1061	0
						11.1061	0.5
						11.1228	0
						11.1228	0
						11.1228	19.9
						11.1394	0
						11.1394	0
[truncated: 370 more rows]

## Sheet: Strain 6
Escherichia coli BW25113 ΔgatC
Biomass		Acetate		Glucose		DOT
Time [h]	Values [g/L]	Time [h]	Values [g/L]	Time [h]	Values [g/L]	Time [h]	Values [%]
0.0792	2.49318	0.5603	0.421417	0.5603	3.56913	0.0069	92.61
0.0792	2.61439	0.5603	0.419526	0.5603	3.09251	0.0069	91.97
0.1156	2.68712	0.8592	0.448832	0.8592	2.34779	0.0069	93.06
0.1156	2.4447	0.8592	0.452613	0.8592	2.35426	0.0097	92.72
0.1522	2.49318	1.1567	0.448832	1.1567	0.0113086	0.0097	91.93
0.1522	2.48106	1.1567	0.452613	1.1567	0.0113086	0.0097	92.78
0.5603	2.84242	1.4631	0.460176	1.4631	4.29054	0.0125	92.55
0.5603	2.86667	1.4631	0.458285	1.4631	4.24262	0.0125	91.8
0.8592	3.13333	1.7622	0.447886	1.7622	2.90082	0.0125	92.97
0.8592	2.93939	1.7622	0.437488	1.7622	2.65992	0.0153	92.84
1.1567	3.73939	2.0658	0.422099	2.0658	0.0222933	0.0153	91.54
1.1567	3.61818	2.0658	0.441444	2.0658	0.0249718	0.0153	93.22
1.4631	3.90909	2.4069	0.398725	2.4069	0.0142578	0.0181	93.5
1.4631	3.95758	2.4069	0.441444	2.4069	0.0222933	0.0181	93.27
1.7622	4.10303	2.7531	0.136766	2.7531	0.0182755	0.0181	94.8
1.7622	4.07879	2.7531	0.148856	2.7531	0.0142578	0.0219	93.98
2.0658	5.1	3.1097	0.0875979	3.1097	0.0236325	0.0219	92.72
2.0658	4.88182	3.1097	0.102912	3.1097	0.0236325	0.0219	94.54
2.4069	5.57273	3.4567	0.179485	3.4567	0.0129186	0.0394	93.61
2.4069	5.28182	3.4567	0.155304	3.4567	0.0182755	0.0394	92.33
2.7531	5.02727	3.7817	0.0892482	3.7817	0.0251853	0.0394	93.73
2.7531	4.91818	3.7817	0.0903019	3.7817	0.023942	0.0572	92.84
3.1097	4.84545	4.1256	0.199885	4.1256	0.0226988	0.0572	91.55
3.1097	4.80909	4.1256	0.190402	4.1256	0.023942	0.0572	93.05
3.4567	5.71818	4.4836	0.166167	4.4836	0.0189691	0.0739	92.32
3.4567	5.9	4.4836	0.171436	4.4836	0.0152393	0.0739	91.58
3.7817	6.18864	4.8667	0.0713356	4.8667	0.0102664	0.0739	93.27
3.7817	6.07955	4.8667	0.0734429	4.8667	0.0115096	0.0906	88.68
4.1256	6.26136	5.1833	0.163006	5.1833	0.0152393	0.0906	91.48
4.1256	6.11591	5.1833	0.161953	5.1833	0.0177258	0.0906	92.41
4.4836	7.97045	5.5056	0.334774	5.5056	0.0049998	0.1072	91.26
4.4836	7.53409	5.8308	0.121039	5.5056	0.0766907	0.1072	91.85
4.8667	7.31591	6.1489	0.162356	5.8308	0.00635245	0.1072	93.29
4.8667	7.27955	6.4694	0.26247	5.8308	0.023937	0.1239	91.97
5.1833	6.26136	6.4694	0.272004	6.1489	0.0536955	0.1239	88.27
5.1833	6.625	6.8183	0.0765444	6.4694	1.21698	0.1239	93.44
5.5056	6.66364	7.1431	0.167714	6.4694	4.03322	0.1406	92.16
6.1489	6.84545	7.4639	0.26884	6.8183	0.0307003	0.1406	91.48
6.4694	8.08182	7.7864	0.237988	7.1431	0.0083886	0.1406	92.86
6.4694	8.37273	8.1381	0.425673	7.1431	0.0363397	0.1572	92.29
6.8183	8.7	8.4594	0.201137	7.4639	0.00203608	0.1572	91.3
7.4639	8.07955	8.4594	0.178855	7.4639	3.17321	0.1572	93.06
7.4639	8.44318	12.9364	0.685676	7.7864	0.0261757	0.1739	91.9
8.1381	9.35227	12.9364	0.736355	8.1381	0.0274462	0.1739	92.29
8.1381	10.2614	12.9711	0.0388772	8.4594	0.984135	0.1739	93.12
8.4594	8.07955	13.0061	0.236439	8.4594	3.90502	0.1906	92.43
12.9711	15.5265			12.9364	2.28765	0.1906	91.8
12.9711	15.1629			12.9364	3.96738	0.1906	93.04
				12.9711	0.0100107	0.2072	92.14
				12.9711	0.040413	0.2072	92.53
				13.0061	0.00747716	0.2072	92.78
				13.0061	0.0378795	0.2239	92.21
						0.2239	92.31
						0.2239	92.75
						0.2406	92.45
						0.2406	92.12
						0.2406	93.24
						0.2572	92.22
						0.2572	91.62
						0.2572	93.01
						0.2739	92.55
						0.2739	92.24
						0.2739	93.37
						0.2906	92.46
						0.2906	92.23
						0.2906	93.02
						0.3072	92.41
						0.3072	91.92
						0.3072	92.9
						0.3239	88.84
						0.3239	89.94
						0.3239	93.16
						0.3406	75.9
						0.3406	78.11
						0.3406	79.07
						0.3572	73.85
						0.3572	75.69
						0.3572	76.41
						0.3739	72.68
						0.3739	74.84
						0.3739	76.04
						0.3906	72.5
						0.3906	74.42
						0.3906	75.76
						0.4072	72.34
						0.4072	74.11
						0.4072	75.62
						0.4239	71.98
						0.4239	74.14
						0.4239	75.28
						0.4406	71.8
						0.4406	74.08
						0.4406	75.13
						0.4572	71.63
						0.4572	73.33
						0.4572	74.83
						0.4739	71.18
						0.4739	73.75
						0.4739	74.55
						0.4906	71.32
						0.4906	73.24
						0.4906	75.09
						0.5072	71.37
						0.5072	72.94
						0.5072	74.87
						0.5239	70.87
						0.5239	72.57
						0.5239	74.14
						0.5406	70.71
						0.5406	72.2
						0.5406	73.75
						0.5572	70.79
						0.5572	72.5
						0.5572	73.47
						0.5739	70.73
						0.5739	72.13
						0.5739	73.7
						0.5906	70.22
						0.5906	71.45
						0.5906	73.26
						0.6072	69.3
						0.6072	71.39
						0.6072	73.22
						0.6239	69.67
						0.6239	71.28
						0.6239	72.84
						0.6406	68.98
						0.6406	70.94
						0.6406	72.8
						0.6572	68.92
						0.6572	71.98
						0.6572	72.01
						0.6739	68.56
						0.6739	71.42
						0.6739	72.31
						0.6906	68.57
						0.6906	71.27
						0.6906	72.42
						0.7072	68.28
						0.7072	71.27
						0.7072	72.53
						0.7239	67.96
						0.7239	71.45
						0.7239	72.71
						0.7406	67.93
						0.7406	71.78
						0.7406	72.18
						0.7572	67.98
						0.7572	72.34
						0.7572	72.27
						0.7739	67.88
						0.7739	72.66
						0.7739	72.67
						0.7906	68.05
						0.7906	72.52
						0.7906	73.36
						0.8072	68.78
						0.8072	72.89
						0.8072	73.4
						0.8239	69.18
						0.8239	73.29
						0.8239	73.75
						0.8406	69.14
						0.8406	74.02
						0.8406	74.27
						0.8572	69.72
						0.8572	73.79
						0.8572	74.3
						0.8739	70.33
						0.8739	74.03
						0.8739	74.86
						0.8906	70.78
						0.8906	73.8
						0.8906	75.05
						0.9072	71.46
						0.9072	73.83
						0.9072	74.94
						0.9239	71.23
						0.9239	73.9
						0.9239	74.83
						0.9406	71.53
						0.9406	73.63
						0.9406	75.06
						0.9572	72
						0.9572	73.49
						0.9572	74.64
						0.9739	71.81
						0.9739	73.02
						0.9739	74.63
						0.9906	71.62
						0.9906	73.21
						0.9906	74.11
						1.0072	71.84
						1.0072	72.45
						1.0072	73.48
						1.0239	71.34
						1.0239	71.73
						1.0239	73.37
						1.0406	70.48
						1.0406	71.79
						1.0406	73.25
						1.0572	70.23
						1.0572	70.9
						1.0572	72.27
						1.0739	69.51
						1.0739	70.41
						1.0739	71.55
						1.0906	68.52
						1.0906	69.39
						1.0906	71.39
						1.1072	68.36
						1.1072	69.74
						1.1072	71.1
						1.1239	67.38
						1.1239	69.3
						1.1239	70.8
						1.1406	66.87
						1.1406	69.17
						1.1406	70.35
						1.1572	66.64
						1.1572	69.31
						1.1572	69.9
						1.1739	66.15
						1.1739	69.23
						1.1739	69.48
						1.1906	65.82
						1.1906	69.38
						1.1906	69.43
						1.2072	65.38
						1.2072	69.43
						1.2072	69
						1.2239	65.41
						1.2239	69.4
						1.2239	69.36
						1.2406	65.47
						1.2406	69.11
						1.2406	69.21
						1.2572	65.24
						1.2572	68.86
						1.2572	77.35
						1.2739	64.89
						1.2739	68.77
						1.2739	84.13
						1.2906	64.93
						1.2906	69.28
						1.2906	84.86
						1.3072	64.88
						1.3072	68.96
						1.3072	85.21
						1.3239	64.76
						1.3239	68.76
						1.3239	85.5
						1.3406	64.32
						1.3406	68.35
						1.3406	85.97
						1.3572	64.79
						1.3572	68.02
						1.3572	86.76
						1.3739	78.6
						1.3739	68.09
						1.3739	87.55
						1.3906	84.36
						1.3906	68.32
						1.3906	88.11
						1.4072	85.72
						1.4072	80.78
						1.4072	88.77
						1.4239	80.92
						1.4239	81.63
						1.4239	87.25
						1.4406	67.97
						1.4406	71.5
						1.4406	68.5
						1.4572	64.4
						1.4572	67.11
						1.4572	65.72
						1.4739	62.92
						1.4739	66.11
						1.4739	65.19
						1.4906	62.24
						1.4906	65.79
						1.4906	65.69
						1.5072	61.6
						1.5072	65.89
						1.5072	64.86
						1.5239	62.28
						1.5239	65.01
						1.5239	65.68
						1.5406	62.24
						1.5406	65.46
						1.5406	65.7
						1.5572	61.78
						1.5572	64.72
						1.5572	65.53
						1.5739	61.42
						1.5739	64.83
						1.5739	65.05
						1.5906	61.03
						1.5906	64.7
						1.5906	65.41
						1.6072	60.89
						1.6072	65.31
						1.6072	65.45
						1.6239	61.01
						1.6239	65.09
						1.6239	65.82
						1.6406	60.84
						1.6406	66.85
						1.6406	65.57
						1.6572	60.1
						1.6572	66.12
						1.6572	65.94
						1.6739	59.77
						1.6739	64.86
						1.6739	66.26
						1.6906	59.9
						1.6906	64.86
						1.6906	66.14
						1.7072	60.51
						1.7072	64.77
						1.7072	66.6
						1.7239	59.72
						1.7239	63.68
						1.7239	66.44
						1.7406	59.75
						1.7406	63.9
						1.7406	66.83
						1.7572	59.52
						1.7572	62.87
						1.7572	66
						1.7739	58.88
						1.7739	63.63
						1.7739	66.46
						1.7906	58.98
						1.7906	61.91
						1.7906	66.06
						1.8072	59.22
						1.8072	62.5
						1.8072	66.04
						1.8239	58.71
						1.8239	60.67
						1.8239	65.67
						1.8406	58.66
						1.8406	61.37
						1.8406	65.47
						1.8572	57.75
						1.8572	59.85
						1.8572	64.69
						1.8739	57.22
						1.8739	60.52
						1.8739	64.08
						1.8906	56.41
						1.8906	60
						1.8906	63.65
						1.9072	55.91
						1.9072	59.74
						1.9072	63.49
						1.9239	55.37
						1.9239	59.96
						1.9239	62.92
						1.9406	54.52
						1.9406	59.67
						1.9406	62.49
						1.9572	53.93
						1.9572	59.37
						1.9572	62.37
						1.9739	53.32
						1.9739	58.71
						1.9739	61.72
						1.9906	52.58
						1.9906	58.25
						1.9906	61.65
						2.0072	52.66
						2.0072	57.66
						2.0072	61.7
						2.0239	52.37
						2.0239	58.16
						2.0239	61.34
						2.0406	51.82
						2.0406	58.35
						2.0406	77.86
						2.0572	51.76
						2.0572	57.07
						2.0572	82.08
						2.0739	51.6
						2.0739	53.51
						2.0739	81.89
						2.0906	54.01
						2.0906	47.93
						2.0906	81.76
						2.1072	76.18
						2.1072	55.38
						2.1072	81.83
						2.1239	80.37
						2.1239	57.73
						2.1239	81.87
						2.1406	81.55
						2.1406	56.4
						2.1406	82.92
						2.1572	82.33
						2.1572	55.85
						2.1572	83.78
						2.1739	82.68
						2.1739	55.53
						2.1739	83.56
						2.1906	83.96
						2.1906	55.07
						2.1906	84.7
						2.2072	84.5
						2.2072	76.05
						2.2072	85.72
						2.2239	84.81
						2.2239	79.48
						2.2239	86.74
						2.2406	85.83
						2.2406	79.85
						2.2406	86.77
						2.2572	85.7
						2.2572	77.16
						2.2572	87.02
						2.2739	85.89
						2.2739	80.29
						2.2739	87.08
						2.2906	85.92
						2.2906	71.88
						2.2906	87.49
						2.3072	85.51
						2.3072	65.2
						2.3072	87.31
						2.3239	85.62
						2.3239	77.97
						2.3239	87.55
						2.3406	85.38
						2.3406	80.56
						2.3406	87.41
						2.3572	85.68
						2.3572	81.05
						2.3572	87.99
						2.3739	85.78
						2.3739	79.44
						2.3739	87.65
						2.3906	85.55
						2.3906	80.38
						2.3906	87.92
						2.4072	85.78
						2.4072	79.6
						2.4072	87.87
						2.4239	85.72
						2.4239	81.15
						2.4239	88.03
						2.4406	86.04
						2.4406	74.45
						2.4406	87.98
						2.4572	85.51
						2.4572	81.35
						2.4572	87.62
						2.4739	84.95
						2.4739	80.53
						2.4739	87.84
						2.4906	85.2
						2.4906	83.56
						2.4906	87.55
						2.5072	85.1
						2.5072	82.78
						2.5072	87.85
						2.5239	85.54
						2.5239	85.34
						2.5239	87.99
						2.5406	85.63
						2.5406	85.32
						2.5406	87.75
						2.5572	85.52
						2.5572	85.83
						2.5572	87.65
						2.5739	85.45
						2.5739	86.42
						2.5739	87.08
						2.5906	85.75
						2.5906	86.03
						2.5906	87.31
						2.6072	85.65
						2.6072	86.37
						2.6072	86.73
						2.6239	85.93
						2.6239	86.13
						2.6239	86.87
						2.6406	86.26
						2.6406	86.01
						2.6406	86.83
						2.6572	86.26
						2.6572	85.97
						2.6572	86.43
						2.6739	85.95
						2.6739	86.42
						2.6739	86.53
						2.6906	86.43
						2.6906	86.39
						2.6906	88.62
						2.7072	86.26
						2.7072	86.4
						2.7072	90.39
						2.7239	86.53
						2.7239	86.15
						2.7239	90.65
						2.7406	86.49
						2.7406	85.92
						2.7406	91.52
						2.7572	86.75
						2.7572	86.11
						2.7572	91.19
						2.7739	86.7
						2.7739	85.85
						2.7739	91.63
						2.7906	86.6
						2.7906	85.88
						2.7906	91.93
						2.8072	86.69
						2.8072	85.57
						2.8072	91.45
						2.8239	72.09
						2.8239	73.54
						2.8239	80.65
						2.8406	49.44
						2.8406	53.3
						2.8406	62.29
						2.8572	65.53
						2.8572	72.7
						2.8572	77.85
						2.8739	81.1
						2.8739	84.07
						2.8739	86.26
						2.8906	83.1
						2.8906	84.91
						2.8906	87.27
						2.9072	82.49
						2.9072	85.05
						2.9072	89.68
						2.9239	83.4
						2.9239	85.86
						2.9239	90.29
						2.9406	84.56
						2.9406	85.73
						2.9406	90.78
						2.9572	59.15
						2.9572	64.27
						2.9572	69.25
						2.9739	43.53
						2.9739	51.98
						2.9739	57.11
						2.9906	68.24
						2.9906	76.51
						2.9906	75.73
						3.0072	80
						3.0072	83.37
						3.0072	84.24
						3.0239	80.69
						3.0239	83.84
						3.0239	84.11
						3.0406	80.69
						3.0406	84.08
						3.0406	86.5
						3.0572	80.93
						3.0572	86.74
						3.0572	89.72
						3.0739	62.87
						3.0739	68.44
						3.0739	73.25
						3.0906	43.51
						3.0906	53.29
						3.0906	58.58
						3.1072	64.34
						3.1072	74.35
						3.1072	73
						3.1239	79.32
						3.1239	82.95
						3.1239	82.33
						3.1406	80.28
						3.1406	83.38
						3.1406	83.11
						3.1572	79.83
						3.1572	83.93
						3.1572	85.51
						3.1739	79.93
						3.1739	87.63
						3.1739	88.04
						3.1906	52.75
						3.1906	60.01
						3.1906	64.59
						3.2072	41.78
						3.2072	50.55
						3.2072	55.46
						3.2239	68.64
						3.2239	74.49
						3.2239	71.03
						3.2406	77.51
						3.2406	81.78
						3.2406	81.16
						3.2572	76.49
						3.2572	81.86
						3.2572	81.48
						3.2739	77.38
						3.2739	82.58
						3.2739	82.71
						3.2906	76.87
						3.2906	86.97
						3.2906	87.92
						3.3072	69.64
						3.3072	80.31
						3.3072	84.5
						3.3239	46.05
						3.3239	53.79
						3.3239	58.53
						3.3406	55.64
						3.3406	62.86
						3.3406	56.86
						3.3572	74.98
						3.3572	80.11
						3.3572	79.27
						3.3739	76.54
						3.3739	81.42
						3.3739	81.52
						3.3906	75.54
						3.3906	81.82
						3.3906	81.33
						3.4072	82.2
						3.4072	86.1
						3.4072	87.32
						3.4239	61.44
						3.4239	70.09
						3.4239	74.24
						3.4406	42.99
						3.4406	51.92
						3.4406	56.23
						3.4572	41.55
						3.4572	54.41
						3.4572	52.62
						3.4739	71.36
						3.4739	78.31
						3.4739	77.18
						3.4906	75.04
						3.4906	81.08
						3.4906	80.42
						3.5072	73.95
						3.5072	80.36
						3.5072	78.68
						3.5239	72.98
						3.5239	79.92
						3.5239	85.31
						3.5406	43.14
						3.5406	52.93
						3.5406	57.08
						3.5572	38.14
						3.5572	46.4
						3.5572	50.97
						3.5739	62.63
						3.5739	72.11
						3.5739	67.42
						3.5906	69.7
						3.5906	79.7
						3.5906	79.46
						3.6072	70.92
						3.6072	80.13
						3.6072	78.44
						3.6239	74.29
						3.6239	80.34
						3.6239	78.77
						3.6406	60.07
						3.6406	68.26
						3.6406	72.13
						3.6572	41.4
						3.6572	48.47
						3.6572	54.84
						3.6739	42.73
						3.6739	58.82
						3.6739	50.61
						3.6906	69.42
						3.6906	76.72
						3.6906	76.13
						3.7072	70.2
						3.7072	79.43
						3.7072	78.3
						3.7239	70.7
						3.7239	79.69
						3.7239	77.35
						3.7406	63.54
						3.7406	73.35
						3.7406	75.12
						3.7572	39.67
						3.7572	49.91
						3.7572	52.5
						3.7739	35
						3.7739	43.09
						3.7739	48.76
						3.7906	67.17
						3.7906	74.38
						3.7906	72.53
						3.8072	69.56
						3.8072	79.1
						3.8072	78.76
						3.8239	69.04
						3.8239	78.42
						3.8239	77.03
						3.8406	77.19
						3.8406	80.33
						3.8406	81.57
						3.8572	42.3
						3.8572	52.51
						3.8572	55.46
						3.8739	34.89
						3.8739	44.61
						3.8739	47.31
						3.8906	57.69
						3.8906	69.39
						3.8906	65.27
						3.9072	67.76
						3.9072	77.98
						3.9072	77.1
						3.9239	65.78
						3.9239	78.41
						3.9239	76.35
						3.9406	74.45
						3.9406	79.43
						3.9406	77.84
						3.9572	68.81
						3.9572	79.54
						3.9572	83.11
						3.9739	38.41
						3.9739	50.21
						3.9739	53
						3.9906	32.82
						3.9906	42.48
						3.9906	48.24
						4.0072	62.39
						4.0072	69.59
						4.0072	69.25
						4.0239	67.56
						4.0239	78.2
						4.0239	76.6
						4.0406	65.7
						4.0406	77.24
						4.0406	76.01
						4.0572	73.91
						4.0572	79.39
						4.0572	79.2
						4.0739	78.66
						4.0739	84.43
						4.0739	84.96
						4.0906	60.2
						4.0906	71.2
						4.0906	75.27
						4.1072	36.31
						4.1072	47.27
						4.1072	50.89
						4.1239	31.3
						4.1239	40.6
						4.1239	45.88
						4.1406	60.4
						4.1406	67.85
						4.1406	63.05
						4.1572	66.02
						4.1572	76.34
						4.1572	75.43
						4.1739	65.06
						4.1739	76.64
						4.1739	74.13
						4.1906	76.55
						4.1906	78.09
						4.1906	75.83
						4.2072	45.35
						4.2072	54.45
						4.2072	59.3
						4.2239	32.61
						4.2239	42.67
						4.2239	46.86
						4.2406	64.46
						4.2406	71.01
						4.2406	70.09
						4.2572	66.61
						4.2572	76.28
						4.2572	76.14
						4.2739	71.69
						4.2739	80.65
						4.2739	80.8
						4.2906	68.98
						4.2906	83.82
						4.2906	84.1
						4.3072	66.52
						4.3072	85.89
						4.3072	86.11
						4.3239	63.62
						4.3239	86.77
						4.3239	87.16
						4.3406	12.08
						4.3406	51.76
						4.3406	54.25
						4.3572	5.59
						4.3572	56.82
						4.3572	49.35
						4.3739	12.23
						4.3739	75.22
						4.3739	74.89
						4.3906	2.59
						4.3906	80.46
						4.3906	76.13
						4.4072	1.57
						4.4072	84.25
						4.4072	83.56
						4.4239	39.16
						4.4239	85.05
						4.4239	85.51
						4.4406	69.06
						4.4406	86.54
						4.4406	86.78
						4.4572	35.17
						4.4572	52.23
						4.4572	53.75
						4.5056	30.64
						4.5056	45.36
						4.5056	45.48
						4.5136	68.66
						4.5136	82.47
						4.5136	77.41
						4.5303	78.12
						4.5303	84.56
						4.5303	82.97
						4.5469	80.32
						4.5469	86.5
						4.5469	84.98
						4.5636	82.6
						4.5636	86.99
						4.5636	86.57
						4.5803	51.02
						4.5803	63.56
						4.5803	66.59
						4.5969	32.63
						4.5969	44.26
						4.5969	47.08
						4.6136	57.99
						4.6136	62.11
						4.6136	56.45
						4.6303	68.77
						4.6303	74.1
						4.6303	74.56
						4.6469	76.57
						4.6469	81.84
						4.6469	75.81
						4.6636	77.8
						4.6636	84.46
						4.6636	82.96
						4.6803	80.02
						4.6803	85.95
						4.6803	84.93
						4.6969	81.73
						4.6969	87.58
						4.6969	85.61
						4.7136	79.38
						4.7136	87.69
						4.7136	86.15
						4.7303	34.14
						4.7303	58.99
						4.7303	58.87
						4.7469	7.06
						4.7469	43.08
						4.7469	46.74
						4.7636	24.82
						4.7636	70.71
						4.7636	69.95
						4.7803	16.5
						4.7803	80.38
						4.7803	75.9
						4.7969	16.04
						4.7969	83.54
						4.7969	82.98
						4.8136	13.1
						4.8136	85.94
						4.8136	84.36
						4.8303	3.27
						4.8303	78.67
						4.8303	82.33
						4.8469	4.75
						4.8469	43.79
						4.8469	48.49
						4.8636	19.24
						4.8636	56.36
						4.8636	44.15
						4.8803	22.66
						4.8803	72.05
						4.8803	71.96
						4.8969	50.72
						4.8969	81.03
						4.8969	72.78
						4.9136	62.39
						4.9136	82.52
						4.9136	82.56
						4.9303	55.77
						4.9303	78.92
						4.9303	85
						4.9469	27.45
						4.9469	42.28
						4.9469	49.72
						4.9636	24.47
						4.9636	35.27
						4.9636	44.67
						4.9803	62.98
						4.9803	67.31
						4.9803	69.56
						4.9969	63.7
						4.9969	71.08
						4.9969	72.45
						5.0136	72.71
						5.0136	80.27
						5.0136	78.86
						5.0303	76.45
						5.0303	83.23
						5.0303	83.05
						5.0469	48.5
						5.0469	62.49
						5.0469	67.41
						5.0636	9.35
						5.0636	39.49
						5.0636	46.57
						5.0803	3.81
						5.0803	50.39
						5.0803	45.65
						5.0969	10.05
						5.0969	70.01
						5.0969	72.55
						5.1136	1.76
						5.1136	76.59
						5.1136	70.99
						5.1303	1.21
						5.1303	81.76
						5.1303	81.02
						5.1469	0.93
						5.1469	74.64
						5.1469	79.44
						5.1636	0.77
						5.1636	40.54
						5.1636	47.41
						5.1803	0.61
						5.1803	45.1
						5.1803	42.12
						5.1969	0.5
						5.1969	69.74
						5.1969	69.71
						5.2136	0.4
						5.2136	76.67
						5.2136	71.27
						5.2303	1.11
						5.2303	81.2
						5.2303	76.17
						5.2469	26
						5.2469	83.39
						5.2469	79.65
						5.2636	26.66
						5.2636	45.88
						5.2636	44.62
						5.2803	15.13
						5.2803	36.17
						5.2803	37.08
						5.2969	14.86
						5.2969	60.67
						5.2969	47.8
						5.3136	21.72
						5.3136	68.81
						5.3136	67.12
						5.3303	23.08
						5.3303	76.71
						5.3303	65.3
						5.3469	16.16
						5.3469	80.91
						5.3469	77.81
						5.3636	3.02
						5.3636	74.75
						5.3636	80.63
						5.3803	0.87
						5.3803	36.29
						5.3803	39.91
						5.3969	0.5
						5.3969	24.33
						5.3969	30.28
						5.4136	0.42
						5.4136	58.41
						5.4136	45.17
						5.4303	3.05
						5.4303	61.64
						5.4303	60.55
						5.4469	29.09
						5.4469	73.07
						5.4469	59.51
						5.4636	48.43
						5.4636	76.57
						5.4636	75.59
						5.4803	4.94
						5.4803	31.49
						5.4803	36.63
						5.4969	1.22
						5.4969	22.91
						5.4969	29.03
						5.5136	1.37
						5.5136	44.28
						5.5136	32.04
						5.5303	4.27
						5.5303	63.57
						5.5303	62.44
						5.5469	6.9
						5.5469	70.21
						5.5469	62.09
						5.5636	2.1
						5.5636	75.25
						5.5636	73.48
						5.5803	0.27
						5.5803	34.19
						5.5803	39
						5.5969	0.14
						5.5969	22.15
						5.5969	27.78
						5.6136	0.08
						5.6136	33.17
						5.6136	24.58
						5.6303	0
						5.6303	59.89
						5.6303	58.96
						5.6469	0
						5.6469	58.58
						5.6469	60.4
						5.6636	0
						5.6636	72.86
						5.6636	71.11
						5.6803	0
						5.6803	77.69
						5.6803	78.17
						5.6969	0
						5.6969	32.56
						5.6969	40.45
						5.7136	0
						5.7136	18.52
						5.7136	25.53
						5.7303	0
						5.7303	26.84
						5.7303	22.1
						5.7469	0
						5.7469	57.2
						5.7469	55.08
						5.7636	0
						5.7636	56
						5.7636	57.34
						5.7803	0
						5.7803	71.56
						5.7803	68.32
						5.7969	0
						5.7969	49.09
						5.7969	56.24
						5.8136	0
						5.8136	19.9
						5.8136	26.31
						5.8303	0
						5.8303	15.9
						5.8303	9.93
						5.8469	0
						5.8469	48.87
						5.8469	27.35
						5.8636	0
						5.8636	57.4
						5.8636	57.36
						5.8803	0
						5.8803	66.26
						5.8803	55.96
						5.8969	0
						5.8969	53.69
						5.8969	53.64
						5.9136	0
						5.9136	21.63
						5.9136	23.52
						5.9303	0
						5.9303	16.1
						5.9303	18.64
						5.9469	0
						5.9469	36.45
						5.9469	13.78
						5.9636	0
						5.9636	56.85
						5.9636	11.88
						5.9803	0
						5.9803	55.4
						5.9803	1.33
						5.9969	0
						5.9969	72.34
						5.9969	0.77
						6.0136	0
						6.0136	39.27
						6.0136	39.66
						6.0303	0
						6.0303	17.54
						6.0303	16.92
						6.0469	0
						6.0469	14
						6.0469	14.68
						6.0636	0
						6.0636	42.65
						6.0636	29.35
						6.0803	0
						6.0803	55.07
						6.0803	54.93
						6.0969	0
						6.0969	57.86
						6.0969	56.49
						6.1136	0
						6.1136	51.52
						6.1136	54.78
						6.1303	0
						6.1303	18.06
						6.1303	18.59
						6.1469	0
						6.1469	13.61
						6.1469	18.12
						6.1636	0
						6.1636	23.63
						6.1636	15.02
						6.1803	0
						6.1803	53.19
						6.1803	54.02
						6.1969	0
						6.1969	53.47
						6.1969	54.8
						6.2136	0
						6.2136	56.97
						6.2136	60.98
						6.2303	0
						6.2303	16.74
						6.2303	19.76
						6.2469	0
						6.2469	11.99
						6.2469	18.48
						6.2636	0
						6.2636	18.72
						6.2636	13.99
						6.2803	0
						6.2803	50.46
						6.2803	50.32
						6.2969	0
						6.2969	52.42
						6.2969	53.15
						6.3136	0
						6.3136	69.04
						6.3136	67
						6.3303	0
						6.3303	41.99
						6.3303	46.36
						6.3469	0
						6.3469	13.13
						6.3469	16.3
						6.3636	0
						6.3636	10.37
						6.3636	14.47
						6.3803	0
						6.3803	26.36
						6.3803	1.47
						6.3969	0
						6.3969	49.91
						6.3969	44.81
						6.4136	0
						6.4136	50.58
						6.4136	50.58
						6.4303	0
						6.4303	69.75
						6.4303	58.74
						6.4469	0
						6.4469	16.56
						6.4469	2.74
						6.4636	0
						6.4636	10.8
						6.4636	9.35
						6.4803	0
						6.4803	8.6
						6.4803	11.99
						6.4969	4.02
						6.4969	45.79
						6.4969	33.07
						6.5136	7.36
						6.5136	47.93
						6.5136	46.64
						6.5303	12.99
						6.5303	66.43
						6.5303	63.55
						6.5469	3.22
						6.5469	40.88
						6.5469	41.92
						6.5636	0.08
						6.5636	10.23
						6.5636	12.41
						6.5803	0
						6.5803	9.62
						6.5803	12.75
						6.5969	0
						6.5969	22.84
						6.5969	12.31
						6.6136	0
						6.6136	45.47
						6.6136	47.82
						6.6303	0
						6.6303	58.8
						6.6303	51.68
						6.6469	0
						6.6469	67.11
						6.6469	64.66
						6.6636	0
						6.6636	26.69
						6.6636	27.35
						6.6803	0
						6.6803	9.83
						6.6803	10.57
						6.6969	0
						6.6969	9.59
						6.6969	13.56
						6.7136	0
						6.7136	38.21
						6.7136	13.17
						6.7303	0
						6.7303	44.46
						6.7303	48.05
						6.7469	0
						6.7469	62.62
						6.7469	59.69
						6.7636	0
						6.7636	41.85
						6.7636	51.68
						6.7803	11.61
						6.7803	9.43
						6.7803	25.31
						6.7969	17.81
						6.7969	10.41
						6.7969	21.1
						6.8136	21.05
						6.8136	22.08
						6.8136	10.42
						6.8303	23.22
						6.8303	44.33
						6.8303	26.69
						6.8469	24.31
						6.8469	57.84
						6.8469	50.06
						6.8636	25.77
						6.8636	67.98
						6.8636	64.66
						6.8803	22.61
						6.8803	73.12
						6.8803	67.78
						6.8969	15.9
						6.8969	23.78
						6.8969	26.28
						6.9136	3.92
						6.9136	8.8
						6.9136	5.84
						6.9303	0.69
						6.9303	8.68
						6.9303	1.33
						6.9469	23.61
						6.9469	39.85
						6.9469	9.26
						6.9636	7.35
						6.9636	44.23
						6.9636	20.92
						6.9803	0.64
						6.9803	62.12
						6.9803	29.32
						6.9969	0.19
						6.9969	69.56
						6.9969	62.92
						7.0136	0
						7.0136	13.93
						7.0136	16.29
						7.0303	0
						7.0303	9.41
						7.0303	8.21
						7.0469	2.12
						7.0469	8.72
						7.0469	6.19
						7.0636	16.41
						7.0636	45.33
						7.0636	39.79
						7.0803	20.97
						7.0803	51.96
						7.0803	49.24
						7.0969	22.54
						7.0969	65.27
						7.0969	60.96
						7.1136	22.9
						7.1136	22.6
						7.1136	21.04
						7.1303	25.13
						7.1303	7.1
						7.1303	7.91
						7.1469	26.3
						7.1469	5.3
						7.1469	8.29
						7.1636	15.18
						7.1636	38.13
						7.1636	31.52
						7.1803	1.8
						7.1803	45.57
						7.1803	38.41
						7.1969	0.47
						7.1969	59.08
						7.1969	49.75
						7.2136	0.19
						7.2136	24.78
						7.2136	29.19
						7.2303	0.03
						7.2303	6.71
						7.2303	6.58
						7.2469	0
						7.2469	6.94
						7.2469	7.33
						7.2636	18.26
						7.2636	38.28
						7.2636	22.45
						7.2803	21.72
						7.2803	44.59
						7.2803	42.31
						7.2969	24.68
						7.2969	60.83
						7.2969	46.65
						7.3136	25.51
						7.3136	69.04
						7.3136	65.98
						7.3303	26.19
						7.3303	19.92
						7.3303	10.5
						7.3469	25.06
						7.3469	5.8
						7.3469	5.47
						7.3636	6.96
						7.3636	4.27
						7.3636	1.47
						7.3803	0.79
						7.3803	43.5
						7.3803	0.92
						7.3969	0.31
						7.3969	46.04
						7.3969	45.31
						7.4136	0.08
						7.4136	58.94
						7.4136	49.28
						7.4303	0
						7.4303	32.99
						7.4303	35.73
						7.4469	0
						7.4469	4.25
						7.4469	5.97
						7.4636	0
						7.4636	4.96
						7.4636	5.54
						7.4803	17.77
						7.4803	38.34
						7.4803	22.57
						7.4969	23.32
						7.4969	45.11
						7.4969	25.4
						7.5136	26.14
						7.5136	56.49
						7.5136	46.4
						7.5303	25.69
						7.5303	53.12
						7.5303	56.64
						7.5469	7.64
						7.5469	5.76
						7.5469	7.53
						7.5636	0.76
						7.5636	3.58
						7.5636	5.13
						7.5803	0.22
						7.5803	28.6
						7.5803	15.43
						7.5969	0.03
						7.5969	46.01
						7.5969	16.14
						7.6136	0
						7.6136	44.3
						7.6136	24.02
						7.6303	0
						7.6303	64.82
						7.6303	56.48
						7.6469	0
						7.6469	32.83
						7.6469	34.49
						7.6636	0
						7.6636	4.07
						7.6636	1.98
						7.6803	0
						7.6803	3.06
						7.6803	1.05
						7.6969	1.04
						7.6969	39.95
						7.6969	4.86
						7.7136	0.12
						7.7136	44.89
						7.7136	8.98
						7.7303	0
						7.7303	50.72
						7.7303	1.31
						7.7469	0
						7.7469	66.36
						7.7469	8.19
						7.7636	0
						7.7636	5.76
						7.7636	0.12
						7.7803	0
						7.7803	2.41
						7.7803	1.65
						7.7969	0
						7.7969	29.82
						7.7969	5.79
						7.8136	0
						7.8136	45.61
						7.8136	23.57
						7.8303	0
						7.8303	43.89
						7.8303	33.92
						7.8469	0
						7.8469	64.46
						7.8469	55.04
						7.8636	0
						7.8636	71.19
						7.8636	64.47
						7.8803	0
						7.8803	72.62
						7.8803	56.13
						7.8969	0
						7.8969	5.64
						7.8969	2.73
						7.9136	0
						7.9136	2.62
						7.9136	0.98
						7.9303	0
						7.9303	18.74
						7.9303	0.48
						7.9469	0
						7.9469	43.33
						7.9469	0.25
						7.9636	0
						7.9636	41.91
						7.9636	0.11
						7.9803	0
						7.9803	63.94
						7.9803	0
						7.9969	0
						7.9969	50.82
						7.9969	0
						8.0136	0
						8.0136	4.8
						8.0136	0
						8.0303	0
						8.0303	2.38
						8.0303	0
						8.0469	0
						8.0469	39.13
						8.0469	0
						8.0636	0
						8.0636	44.72
						8.0636	0
						8.0803	1.29
						8.0803	54.68
						8.0803	0
						8.0969	0
						8.0969	67.51
						8.0969	0
						8.1136	0
						8.1136	7.28
						8.1136	0
						8.1303	0
						8.1303	1.84
						8.1303	0
						8.1469	0
						8.1469	1.06
						8.1469	0
						8.1636	0
						8.1636	20.65
						8.1636	0
						8.1803	0
						8.1803	39.12
						8.1803	10.63
						8.1969	0
						8.1969	51.14
						8.1969	8.69
						8.2136	0
						8.2136	4.67
						8.2136	0.12
						8.2303	0
						8.2303	1.44
						8.2303	0
						8.2469	0
						8.2469	9.69
						8.2469	0
						8.2636	0
						8.2636	38.4
						8.2636	0
						8.2803	0
						8.2803	39.94
						8.2803	0
						8.2969	0
						8.2969	61.94
						8.2969	0
						8.3136	0
						8.3136	69
						8.3136	0
						8.3303	0
						8.3303	5.72
						8.3303	0
						8.3469	0
						8.3469	1.67
						8.3469	0
						8.3636	0
						8.3636	0.99
						8.3636	0
						8.3803	0
						8.3803	29.59
						8.3803	0
						8.3969	0
						8.3969	5.5
						8.3969	0.02
						8.4136	0
						8.4136	51.18
						8.4136	0
						8.4303	0
						8.4303	7.66
						8.4303	0
						8.4469	0
						8.4469	1.43
						8.4469	0
						8.4636	0
						8.4636	7.86
						8.4636	0
						8.4803	16.89
						8.4803	38.11
						8.4803	0
						8.4969	23.9
						8.4969	38.61
						8.4969	0
						8.5136	26.57
						8.5136	60.14
						8.5136	0
						8.5303	23.75
						8.5303	36.67
						8.5303	0
						8.5469	5.69
						8.5469	2.47
						8.5469	0
						8.5636	0.5
						8.5636	4.33
						8.5636	0
						8.5803	0.05
						8.5803	39.8
						8.5803	0
						8.7142	0
						8.7142	22.87
						8.7142	0
						8.7169	0
						8.7169	24.85
						8.7169	0
						8.7208	0
						8.7208	5.68
						8.7208	0
						8.7383	0
						8.7383	26.56
						8.7383	0
						8.7561	0
						8.7561	30.67
						8.7561	0
						8.7728	0
						8.7728	60.78
						8.7728	0.35
						8.7894	0
						8.7894	76.27
						8.7894	0
						8.8061	0
						8.8061	79.52
						8.8061	0
						8.8228	0
						8.8228	75.39
						8.8228	0
						8.8394	0
						8.8394	79.9
						8.8394	0
						8.8561	0
						8.8561	84.37
						8.8561	0
						8.8728	0
						8.8728	85.32
						8.8728	0
						8.8894	0
						8.8894	79.07
						8.8894	0
						8.9061	0
						8.9061	76.99
						8.9061	0
						8.9228	0
						8.9228	85.19
						8.9228	0
						8.9394	0
						8.9394	86.07
						8.9394	20.79
						8.9561	0
						8.9561	86.71
						8.9561	7.69
						8.9728	0
						8.9728	85.77
						8.9728	0
						8.9894	36.9
						8.9894	86.63
						8.9894	0
						9.0061	46.47
						9.0061	87.39
						9.0061	0
						9.0228	48
						9.0228	88.47
						9.0228	0
						9.0394	37.15
						9.0394	88.08
						9.0394	0
						9.0561	24.5
						9.0561	88.69
						9.0561	60.01
						9.0728	12.61
						9.0728	89.12
						9.0728	52.08
						9.0894	2.68
						9.0894	89.12
						9.0894	44.79
						9.1061	0.57
						9.1061	89.29
						9.1061	33.44
						9.1228	0.24
						9.1228	87.07
						9.1228	41.79
						9.1394	0.07
						9.1394	82.16
						9.1394	30.72
						9.1561	0
						9.1561	88.94
						9.1561	20.58
						9.1728	0
						9.1728	89.51
						9.1728	31.95
						9.1894	0
						9.1894	89.69
						9.1894	25.67
						9.2061	0
						9.2061	89.84
						9.2061	22.24
						9.2228	51.03
						9.2228	90.19
						9.2228	40.36
						9.2394	57.46
						9.2394	89.69
						9.2394	57.61
						9.2561	59.45
						9.2561	90.12
						9.2561	50.23
						9.2728	60.36
						9.2728	90.5
						9.2728	43.08
						9.2894	61.19
						9.2894	90.82
						9.2894	62.93
						9.3061	61.95
						9.3061	90.88
						9.3061	58.69
						9.3228	63.92
						9.3228	90.85
						9.3228	54.5
						9.3394	64.8
						9.3394	90.86
						9.3394	49.27
						9.3561	65.24
						9.3561	91.32
						9.3561	45.35
						9.3728	65.58
						9.3728	91.16
						9.3728	44.62
						9.3894	65.69
						9.3894	91.48
						9.3894	77.78
						9.4061	66.34
						9.4061	91.43
						9.4061	76.52
						9.4228	66.38
						9.4228	91.83
						9.4228	72.45
						9.4394	67.04
						9.4394	91.71
						9.4394	68.32
						9.4561	66.92
						9.4561	91.85
						9.4561	64.72
						9.4728	66.84
						9.4728	91.79
						9.4728	81.7
						9.4894	67.46
						9.4894	92.28
						9.4894	78.9
						9.5061	67.95
						9.5061	91.83
						9.5061	75.03
						9.5228	68.15
						9.5228	91.87
						9.5228	71.71
						9.5394	67.76
						9.5394	89.43
						9.5394	67.53
						9.5561	67.98
						9.5561	21.8
						9.5561	5.29
						9.5728	66.66
						9.5728	5.23
						9.5728	4.37
						9.5894	62.36
						9.5894	31.12
						9.5894	3.6
						9.6061	52.42
						9.6061	50.91
						9.6061	52.71
						9.6228	42.72
						9.6228	69.43
						9.6228	53.52
						9.6394	33.3
						9.6394	75.63
						9.6394	43.19
						9.6561	23.76
						9.6561	57.88
						9.6561	50.82
						9.6728	14.39
						9.6728	64.35
						9.6728	17.2
						9.6894	5.24
						9.6894	77.06
						9.6894	66.78
						9.7061	1.58
						9.7061	82.34
						9.7061	77.62
						9.7228	1.14
						9.7228	85.12
						9.7228	81.34
						9.7394	0.87
						9.7394	86.84
						9.7394	83.7
						9.7561	0.69
						9.7561	87.39
						9.7561	85.8
						9.7728	0.53
						9.7728	68.5
						9.7728	77.1
						9.7894	0.43
						9.7894	63.44
						9.7894	59.66
						9.8061	0.33
						9.8061	78.22
						9.8061	77.12
						9.8228	0.26
						9.8228	81.78
						9.8228	82.36
						9.8394	0.18
						9.8394	84.96
						9.8394	84.56
						9.8561	0.11
						9.8561	86.46
						9.8561	86.29
						9.8728	0.06
						9.8728	87.88
						9.8728	87.63
						9.8894	0.02
						9.8894	56.25
						9.8894	66.57
						9.9061	0
						9.9061	70.86
						9.9061	69
						9.9228	0
						9.9228	80.05
						9.9228	81.46
						9.9394	0
						9.9394	83.08
						9.9394	84.94
						9.9561	0
						9.9561	85.82
						9.9561	86.44
						9.9728	0
						9.9728	87.2
						9.9728	87.74
						9.9894	0
						9.9894	87.8
						9.9894	88.48
						10.0061	0
						10.0061	44.96
						10.0061	54.03
						10.0228	0
						10.0228	75.59
						10.0228	73.54
						10.0394	0
						10.0394	81.7
						10.0394	83.17
						10.0561	0
						10.0561	83.96
						10.0561	85.81
						10.0728	0
						10.0728	85.85
						10.0728	87.05
						10.0894	0
						10.0894	87.34
						10.0894	88.15
						10.1061	0
						10.1061	88.26
						10.1061	88.88
						10.1228	0
						10.1228	37.55
						10.1228	45.5
						10.1394	0
						10.1394	74.7
						10.1394	70.8
						10.1561	0
						10.1561	81.67
						10.1561	82.2
						10.1728	0
						10.1728	82.75
						10.1728	84.66
						10.1894	0
						10.1894	86.05
						10.1894	87.42
						10.2061	0
						10.2061	87.22
						10.2061	88.63
						10.2228	0
						10.2228	88.32
						10.2228	89.15
						10.2397	0
						10.2397	56.37
						10.2397	79.64
						10.2561	0
						10.2561	69.38
						10.2561	66.6
						10.2728	0
						10.2728	78.43
						10.2728	80.8
						10.2894	0
						10.2894	83.61
						10.2894	84.42
						10.3061	0
						10.3061	85.53
						10.3061	86.51
						10.3228	0
						10.3228	87.63
						10.3228	87.89
						10.3394	0
						10.3394	88.07
						10.3394	89.17
						10.3561	0
						10.3561	88.86
						10.3561	89.57
						10.3728	0
						10.3728	61.62
						10.3728	55.92
						10.3894	0
						10.3894	78.95
						10.3894	78.76
						10.4061	0
						10.4061	83.05
						10.4061	84.59
						10.4228	0
						10.4228	85.88
						10.4228	86.91
						10.4394	0
						10.4394	87.06
						10.4394	88.45
						10.4561	0
						10.4561	88.44
						10.4561	89.78
						10.4728	0
						10.4728	79.36
						10.4728	88.43
						10.4894	0
						10.4894	66.15
						10.4894	62.94
						10.5061	0
						10.5061	80.17
						10.5061	79.57
						10.5228	0
						10.5228	83.4
						10.5228	84.91
						10.5394	0
						10.5394	85.56
						10.5394	86.8
						10.5561	0
						10.5561	87.45
						10.5561	88.13
						10.5728	0
						10.5728	88.48
						10.5728	89.62
						10.5894	0
						10.5894	63.88
						10.5894	74.44
						10.6061	0
						10.6061	69.48
						10.6061	67.97
						10.6228	0
						10.6228	80.94
						10.6228	81.58
						10.6394	0
						10.6394	84.76
						10.6394	85.27
						10.6561	0
						10.6561	86.18
						10.6561	87.64
						10.6728	0
						10.6728	87.59
						10.6728	88.7
						10.6894	0
						10.6894	89.17
						10.6894	89.71
						10.7061	0
						10.7061	52.88
						10.7061	62.83
						10.7228	0
						10.7228	73.55
						10.7228	69.65
						10.7394	0
						10.7394	82.03
						10.7394	82.79
						10.7561	0
						10.7561	84.79
						10.7561	85.65
						10.7728	0
						10.7728	86.68
						10.7728	87.93
						10.7894	0
						10.7894	87.99
						10.7894	89.24
						10.8061	0
						10.8061	89
						10.8061	90.35
						10.8228	0
						10.8228	44.95
						10.8228	53.63
						10.8394	0
						10.8394	76.45
						10.8394	71.31
						10.8561	0
						10.8561	82.83
						10.8561	83.55
						10.8728	0
						10.8728	84.93
						10.8728	86.44
						10.8894	0
						10.8894	86.71
						10.8894	88.38
						10.9061	0
						10.9061	87.86
						10.9061	89.54
						10.9228	0
						10.9228	89.26
						10.9228	90.5
						10.9394	0
						10.9394	41.44
						10.9394	49.41
						10.9561	0
						10.9561	78.82
						10.9561	73.69
						10.9728	0
						10.9728	83.61
						10.9728	84.09
						10.9894	0
						10.9894	85.62
						10.9894	86.9
						11.0061	0
						11.0061	87.52
						11.0061	88.32
						11.0228	0
						11.0228	88.46
						11.0228	89.54
						11.0394	0
						11.0394	89.43
						11.0394	90.87
						11.0561	0
						11.0561	51.16
						11.0561	42.99
						11.0728	0
						11.0728	80.56
						11.0728	73.7
						11.0894	0
						11.0894	83.97
						11.0894	84.26
						11.1061	0
						11.1061	86.7
						11.1061	86.46
						11.1228	0
						11.1228	87.75
						11.1228	88.37
						11.1394	0
						11.1394	88.31
[truncated: 370 more rows]

## Sheet: Strain 7
Escherichia coli BW25113 ΔgatZ
Biomass		Acetate		Glucose		DOT
Time [h]	Values [g/L]	Time [h]	Values [g/L]	Time [h]	Values [g/L]	Time [h]	Values [%]
0.0792	2.99015	0.5603	0.412909	0.5603	2.87233	0.0069	89.87
0.0792	2.97803	0.5603	0.423307	0.5603	3.00444	0.0069	91.79
0.1156	2.9053	0.8592	0.414799	0.8592	1.90614	0.0069	91.62
0.1156	2.79621	0.8592	0.423307	0.8592	2.06285	0.0097	89.79
0.1522	2.20227	1.1567	0.441269	1.1567	0.521604	0.0097	91.77
0.1522	2.39621	1.1567	0.424253	1.1567	0.60579	0.0097	91.88
0.5603	3.52121	1.4631	0.412909	1.4631	3.93437	0.0125	89.91
0.5603	3.4	1.4631	0.410073	1.4631	3.93307	0.0125	91.68
0.8592	3.25455	1.7622	0.44316	1.7622	2.14704	0.0125	92.25
0.8592	3.37576	1.7622	0.448832	1.7622	2.39312	0.0153	90.05
1.1567	3.03636	2.0658	0.443056	2.0658	0.020954	0.0153	91.75
1.1567	2.79394	2.0658	0.402755	2.0658	0.0196148	0.0153	91.33
1.4631	4.24848	2.4069	0.401143	2.4069	0.0276502	0.0181	90.81
1.4631	4.27273	2.4069	0.404367	2.4069	0.0155971	0.0181	92.38
1.7622	5	2.7531	0.31651	2.7531	0.0142578	0.0181	92.7
1.7622	4.63636	2.7531	0.297971	2.7531	0.0155971	0.0219	91.17
2.0658	5.24545	3.1097	0.155304	3.1097	0.0115793	0.0219	93.09
2.0658	4.88182	3.1097	0.175455	3.1097	0.0102401	0.0219	94.37
2.4069	6.00909	3.4567	0.111779	3.4567	0.0129186	0.0394	90.24
2.4069	5.79091	3.4567	0.126287	3.4567	0.0169363	0.0394	92.07
2.7531	5.53636	3.7817	0.0186513	3.7817	0.0251853	0.0394	93.14
2.7531	5.71818	3.7817	0.0133829	3.7817	0.0251853	0.0572	90.1
3.1097	5.17273	4.1256	0.104	4.1256	0.0189691	0.0572	91.2
3.1097	5.06364	4.1256	0.109268	4.1256	0.0127529	0.0572	91.86
3.4567	6.33636	4.4836	0.113483	4.4836	0.0177258	0.0739	89.78
3.4567	6.7	4.4836	0.114537	4.4836	0.0177258	0.0739	91.54
3.7817	7.425	4.8667	0.0945167	4.8667	0.0102664	0.0739	91.28
3.7817	6.77045	4.8667	0.0955703	4.8667	0.0127529	0.0906	89.75
4.1256	6.77045	5.1833	0.129288	5.1833	0.0127529	0.0906	91.98
4.1256	6.51591	5.1833	0.142986	5.1833	0.0189691	0.0906	91.52
4.4836	7.67955	5.5056	0.348281	5.5056	0.00635245	0.1072	89.91
4.4836	8.11591	5.8308	0.315705	5.5056	0.107802	0.1072	91.94
4.8667	7.46136	6.1489	0.155205	5.8308	0.141618	0.1072	91.58
4.8667	7.27955	6.4694	0.143287	6.1489	0.141618	0.1239	90.09
5.1833	6.84318	6.8183	0.276772	6.4694	2.27476	0.1239	91.39
5.1833	7.09773	7.1431	0.0905832	6.8183	0.023937	0.1239	92
5.5056	7.28182	7.1431	0.163429	7.1431	0.00584759	0.1406	90.15
5.8308	8.62727	7.4639	0.0220227	7.1431	0.0337987	0.1406	91.8
5.8308	8.33636	7.4639	0.0323068	7.4639	2.93436	0.1406	91.83
6.1489	7.68182	7.7864	0.328831	7.4639	3.94949	0.1572	89.9
6.4694	8.84545	8.1381	0.248272	7.7864	0.0249051	0.1572	91.65
6.4694	8.51818	8.4594	0.14886	8.1381	0.0249051	0.1572	91.62
6.8183	8.62727	12.9364	0.597203	8.4594	0.0071181	0.1739	90.12
6.8183	9.13636	12.9711	0.509589	8.4594	4.17437	0.1739	92.19
7.1431	8.84318	12.9711	0.621254	12.9364	0.0201448	0.1739	91.61
7.4639	8.33409	13.0061	0.643587	12.9364	2.77029	0.1906	90.21
7.4639	8.69773			12.9711	0.00874392	0.1906	91.87
7.7864	9.86136			12.9711	3.05404	0.1906	91.58
8.1381	10.5886			13.0061	0.00494364	0.2072	89.84
8.4594	8.84318			13.0061	3.02744	0.2072	92.07
8.4594	8.58864					0.2072	91.56
12.9364	7.4053					0.2239	90.11
12.9711	13.7083					0.2239	91.42
12.9711	12.9205					0.2239	91.89
13.0061	10.072					0.2406	90.26
						0.2406	91.72
						0.2406	91.54
						0.2572	89.93
						0.2572	92.02
						0.2572	91.61
						0.2739	90.42
						0.2739	91.81
						0.2739	91.29
						0.2906	90.26
						0.2906	91.6
						0.2906	91.72
						0.3072	90.03
						0.3072	91.75
						0.3072	92.24
						0.3239	86.43
						0.3239	90.61
						0.3239	91.33
						0.3406	74.95
						0.3406	77.52
						0.3406	79.96
						0.3572	71.75
						0.3572	74.03
						0.3572	76.93
						0.3739	70.85
						0.3739	73.47
						0.3739	76.49
						0.3906	70.34
						0.3906	73.25
						0.3906	75.98
						0.4072	70.21
						0.4072	72.47
						0.4072	75.97
						0.4239	69.98
						0.4239	72.02
						0.4239	75.59
						0.4406	69.86
						0.4406	71.83
						0.4406	75.45
						0.4572	69.66
						0.4572	72.24
						0.4572	74.94
						0.4739	69.16
						0.4739	71.63
						0.4739	74.86
						0.4906	69.24
						0.4906	71.3
						0.4906	73.95
						0.5072	69.27
						0.5072	70.84
						0.5072	73.73
						0.5239	68.93
						0.5239	70.42
						0.5239	73.44
						0.5406	68.61
						0.5406	70.69
						0.5406	73.69
						0.5572	68.12
						0.5572	69.63
						0.5572	73.13
						0.5739	68.3
						0.5739	69.45
						0.5739	73.03
						0.5906	67.66
						0.5906	69.66
						0.5906	72.78
						0.6072	67.24
						0.6072	68.96
						0.6072	72.7
						0.6239	67.14
						0.6239	68.64
						0.6239	72.24
						0.6406	66.81
						0.6406	67.72
						0.6406	72.46
						0.6572	67.06
						0.6572	67.59
						0.6572	71.84
						0.6739	67.13
						0.6739	67.34
						0.6739	72.31
						0.6906	67.16
						0.6906	67.12
						0.6906	71.52
						0.7072	66.47
						0.7072	67.48
						0.7072	71.59
						0.7239	66.46
						0.7239	67.71
						0.7239	71.71
						0.7406	66.49
						0.7406	66.99
						0.7406	71.88
						0.7572	66.58
						0.7572	67.02
						0.7572	72.35
						0.7739	66.57
						0.7739	67.01
						0.7739	72.91
						0.7906	66.8
						0.7906	67.66
						0.7906	72.71
						0.8072	67.23
						0.8072	67.14
						0.8072	73.8
						0.8239	67.44
						0.8239	67.78
						0.8239	73.28
						0.8406	67.86
						0.8406	68.28
						0.8406	73.74
						0.8572	68.21
						0.8572	68.61
						0.8572	73.92
						0.8739	68.59
						0.8739	68.67
						0.8739	74.1
						0.8906	68.93
						0.8906	69.19
						0.8906	73.72
						0.9072	69.27
						0.9072	69.4
						0.9072	73.37
						0.9239	69.33
						0.9239	69.91
						0.9239	73.46
						0.9406	69.39
						0.9406	70.18
						0.9406	72.99
						0.9572	69.31
						0.9572	69.69
						0.9572	72.45
						0.9739	69.42
						0.9739	69.32
						0.9739	71.81
						0.9906	69.17
						0.9906	69.79
						0.9906	71.61
						1.0072	69.2
						1.0072	69.22
						1.0072	71.01
						1.0239	68.49
						1.0239	69.08
						1.0239	70.35
						1.0406	68.15
						1.0406	68.65
						1.0406	69.85
						1.0572	67.38
						1.0572	68.39
						1.0572	69.52
						1.0739	66.89
						1.0739	67.39
						1.0739	68.79
						1.0906	66.07
						1.0906	66.19
						1.0906	68.86
						1.1072	65.55
						1.1072	65.95
						1.1072	68.5
						1.1239	64.82
						1.1239	65.05
						1.1239	68.17
						1.1406	64.57
						1.1406	64.77
						1.1406	68.19
						1.1572	64.62
						1.1572	64.77
						1.1572	67.85
						1.1739	63.76
						1.1739	64.5
						1.1739	68.04
						1.1906	64
						1.1906	64.51
						1.1906	68.15
						1.2072	64.04
						1.2072	64.05
						1.2072	68.16
						1.2239	63.53
						1.2239	63.66
						1.2239	68.3
						1.2406	68.27
						1.2406	63.44
						1.2406	68.09
						1.2572	80.53
						1.2572	63.33
						1.2572	68.11
						1.2739	83.85
						1.2739	63.07
						1.2739	67.77
						1.2906	85.22
						1.2906	63.52
						1.2906	67.53
						1.3072	85.48
						1.3072	63.39
						1.3072	67.74
						1.3239	85.97
						1.3239	69.88
						1.3239	67.64
						1.3406	86.09
						1.3406	80.9
						1.3406	67.2
						1.3572	86.47
						1.3572	83.89
						1.3572	67.38
						1.3739	86.14
						1.3739	85.98
						1.3739	66.9
						1.3906	86.58
						1.3906	86.39
						1.3906	72.02
						1.4072	86.7
						1.4072	87.12
						1.4072	82.96
						1.4239	82.08
						1.4239	84.75
						1.4239	84.77
						1.4406	66.82
						1.4406	68.92
						1.4406	72.41
						1.4572	62.78
						1.4572	63.02
						1.4572	67.3
						1.4739	61.55
						1.4739	61.74
						1.4739	65.67
						1.4906	61.17
						1.4906	60.84
						1.4906	64.93
						1.5072	60.54
						1.5072	60.05
						1.5072	63.68
						1.5239	60.6
						1.5239	60.25
						1.5239	63.8
						1.5406	59.98
						1.5406	59.68
						1.5406	63.56
						1.5572	60.11
						1.5572	59.7
						1.5572	63.22
						1.5739	59.95
						1.5739	59.83
						1.5739	62.63
						1.5906	59.94
						1.5906	59.6
						1.5906	62.4
						1.6072	59.84
						1.6072	59.83
						1.6072	61.66
						1.6239	59.79
						1.6239	59.97
						1.6239	61.84
						1.6406	59.89
						1.6406	59.39
						1.6406	61.53
						1.6572	60.01
						1.6572	59.13
						1.6572	61.45
						1.6739	60.29
						1.6739	59.4
						1.6739	61.04
						1.6906	60.51
						1.6906	59.67
						1.6906	60.69
						1.7072	60.96
						1.7072	59.6
						1.7072	61.11
						1.7239	60.75
						1.7239	59.29
						1.7239	60.28
						1.7406	60.55
						1.7406	59.25
						1.7406	60.65
						1.7572	60.85
						1.7572	59.19
						1.7572	59.98
						1.7739	60.81
						1.7739	59.13
						1.7739	59.97
						1.7906	60.54
						1.7906	58.59
						1.7906	60.06
						1.8072	60.53
						1.8072	58.05
						1.8072	60.4
						1.8239	59.96
						1.8239	58.35
						1.8239	59.51
						1.8406	59.51
						1.8406	57.74
						1.8406	59.13
						1.8572	58.94
						1.8572	57.82
						1.8572	58.87
						1.8739	58.14
						1.8739	57.37
						1.8739	58.13
						1.8906	57.51
						1.8906	56.33
						1.8906	57.84
						1.9072	57.5
						1.9072	55.26
						1.9072	57.26
						1.9239	56.62
						1.9239	55.34
						1.9239	57.03
						1.9406	56.32
						1.9406	54.95
						1.9406	56.84
						1.9572	55.48
						1.9572	54.02
						1.9572	55.62
						1.9739	55.07
						1.9739	53.72
						1.9739	54.42
						1.9906	54.03
						1.9906	53.07
						1.9906	54.29
						2.0072	54.27
						2.0072	52.89
						2.0072	54.17
						2.0239	54.07
						2.0239	52.98
						2.0239	53.75
						2.0406	70.52
						2.0406	52.76
						2.0406	53.17
						2.0572	80.01
						2.0572	51.84
						2.0572	52.45
						2.0739	82.09
						2.0739	55.87
						2.0739	66.33
						2.0906	83.36
						2.0906	74.4
						2.0906	77.92
						2.1072	83.49
						2.1072	79.62
						2.1072	80.16
						2.1239	84.27
						2.1239	80.72
						2.1239	81.81
						2.1406	84.42
						2.1406	81.93
						2.1406	83.15
						2.1572	84.47
						2.1572	82.86
						2.1572	83.76
						2.1739	84.7
						2.1739	83.78
						2.1739	83.4
						2.1906	85.37
						2.1906	83.87
						2.1906	84.53
						2.2072	85.3
						2.2072	84.98
						2.2072	84.85
						2.2239	85.75
						2.2239	85.33
						2.2239	85.4
						2.2406	85.96
						2.2406	85.26
						2.2406	85.69
						2.2572	85.93
						2.2572	86.27
						2.2572	85.92
						2.2739	86.28
						2.2739	86.02
						2.2739	86.11
						2.2906	86.11
						2.2906	86.75
						2.2906	86.14
						2.3072	86.26
						2.3072	86.81
						2.3072	86.89
						2.3239	86.6
						2.3239	86.7
						2.3239	86.43
						2.3406	86.23
						2.3406	86.96
						2.3406	87.16
						2.3572	86.62
						2.3572	87.03
						2.3572	86.87
						2.3739	86.74
						2.3739	86.86
						2.3739	87.23
						2.3906	86.67
						2.3906	87.06
						2.3906	87.35
						2.4072	86.54
						2.4072	87.57
						2.4072	87.21
						2.4239	86.7
						2.4239	87.44
						2.4239	87.4
						2.4406	86.82
						2.4406	87.62
						2.4406	87.66
						2.4572	86.4
						2.4572	87.69
						2.4572	87.42
						2.4739	86.71
						2.4739	87.49
						2.4739	87.22
						2.4906	61.32
						2.4906	59.85
						2.4906	61.58
						2.5072	51.91
						2.5072	47.26
						2.5072	49.52
						2.5239	69.77
						2.5239	64.39
						2.5239	54.93
						2.5406	78.05
						2.5406	79.55
						2.5406	77.24
						2.5572	80.19
						2.5572	81.93
						2.5572	82.54
						2.5739	81.68
						2.5739	82
						2.5739	83.54
						2.5906	82.22
						2.5906	83.03
						2.5906	83.78
						2.6072	74.84
						2.6072	77.74
						2.6072	79.77
						2.6239	54.16
						2.6239	51.97
						2.6239	56.2
						2.6406	47.7
						2.6406	44.97
						2.6406	47.7
						2.6572	68.13
						2.6572	69.36
						2.6572	62.99
						2.6739	75.82
						2.6739	79.46
						2.6739	79.28
						2.6906	79.24
						2.6906	80.79
						2.6906	82.67
						2.7072	78.79
						2.7072	81.27
						2.7072	82.57
						2.7239	60.15
						2.7239	61.04
						2.7239	63.46
						2.7406	48.03
						2.7406	45.69
						2.7406	48.51
						2.7572	46.55
						2.7572	46.05
						2.7572	45.28
						2.7739	71.66
						2.7739	72.52
						2.7739	71.24
						2.7906	76.86
						2.7906	79.1
						2.7906	80.63
						2.8072	76.5
						2.8072	79.72
						2.8072	82.28
						2.8239	66.05
						2.8239	70.34
						2.8239	73.73
						2.8406	49.55
						2.8406	48.97
						2.8406	51.4
						2.8572	44.94
						2.8572	43.07
						2.8572	45.57
						2.8739	67.8
						2.8739	67.34
						2.8739	62.94
						2.8906	74.9
						2.8906	77.68
						2.8906	78.54
						2.9072	75.37
						2.9072	79.64
						2.9072	81.69
						2.9239	76.3
						2.9239	79.55
						2.9239	81.56
						2.9406	76.75
						2.9406	79.82
						2.9406	81.82
						2.9572	56.81
						2.9572	60.16
						2.9572	62.34
						2.9739	46.24
						2.9739	45.36
						2.9739	46.82
						2.9906	65.63
						2.9906	66.6
						2.9906	58.44
						3.0072	75.65
						3.0072	78.07
						3.0072	78.46
						3.0239	74.99
						3.0239	78.48
						3.0239	80.9
						3.0406	75.44
						3.0406	78.84
						3.0406	80.89
						3.0572	75.64
						3.0572	79.39
						3.0572	81.1
						3.0739	60
						3.0739	64.57
						3.0739	67.89
						3.0906	46.1
						3.0906	46.3
						3.0906	47.98
						3.1072	59.18
						3.1072	52.09
						3.1072	46.1
						3.1239	74.43
						3.1239	74.66
						3.1239	74.1
						3.1406	74.2
						3.1406	77.21
						3.1406	79.46
						3.1572	73.95
						3.1572	76.61
						3.1572	78.97
						3.1739	77.11
						3.1739	77.2
						3.1739	78.76
						3.1906	52.77
						3.1906	55.97
						3.1906	57.08
						3.2072	44.78
						3.2072	43.55
						3.2072	44.63
						3.2239	62.69
						3.2239	59.38
						3.2239	48.58
						3.2406	73.43
						3.2406	74.85
						3.2406	75.03
						3.2572	72.5
						3.2572	75.62
						3.2572	78.84
						3.2739	79.13
						3.2739	79.82
						3.2739	78.19
						3.2906	80.69
						3.2906	82.31
						3.2906	78.27
						3.3072	69.71
						3.3072	76.36
						3.3072	76.26
						3.3239	47.31
						3.3239	49.25
						3.3239	50.87
						3.3406	43
						3.3406	41.01
						3.3406	43.04
						3.3572	68.85
						3.3572	70.04
						3.3572	67.72
						3.3739	70.02
						3.3739	75.46
						3.3739	76.62
						3.3906	76.47
						3.3906	78.98
						3.3906	76.95
						3.4072	79.46
						3.4072	81.66
						3.4072	78.29
						3.4239	59.24
						3.4239	65.5
						3.4239	69.39
						3.4406	44.65
						3.4406	44.91
						3.4406	45.69
						3.4572	61.44
						3.4572	63.96
						3.4572	58.31
						3.4739	73.78
						3.4739	74.46
						3.4739	75.74
						3.4906	77.27
						3.4906	79.49
						3.4906	77.44
						3.5072	78.61
						3.5072	81.98
						3.5072	81.53
						3.5239	71.53
						3.5239	79.22
						3.5239	82.8
						3.5406	45.87
						3.5406	47.23
						3.5406	48.89
						3.5572	46.69
						3.5572	45.75
						3.5572	41.82
						3.5739	69.29
						3.5739	70.97
						3.5739	70.87
						3.5906	69.41
						3.5906	74.16
						3.5906	75.62
						3.6072	76.05
						3.6072	79.99
						3.6072	78.9
						3.6239	78.28
						3.6239	82.32
						3.6239	81.72
						3.6406	60.29
						3.6406	65.66
						3.6406	69.18
						3.6572	43.05
						3.6572	44.35
						3.6572	45.7
						3.6739	54.06
						3.6739	51.06
						3.6739	41.77
						3.6906	68.95
						3.6906	71.11
						3.6906	70.59
						3.7072	72.79
						3.7072	74.65
						3.7072	74.65
						3.7239	77.54
						3.7239	80.63
						3.7239	79.1
						3.7406	63.91
						3.7406	71.43
						3.7406	74.31
						3.7572	43.15
						3.7572	45.07
						3.7572	45.44
						3.7739	60.47
						3.7739	54.77
						3.7739	49.8
						3.7906	70.4
						3.7906	71.53
						3.7906	73.19
						3.8072	76.78
						3.8072	76.56
						3.8072	74.72
						3.8239	78.76
						3.8239	79.84
						3.8239	80.62
						3.8406	80.27
						3.8406	81.8
						3.8406	82.15
						3.8572	45.56
						3.8572	48.59
						3.8572	49.27
						3.8739	39.28
						3.8739	39.11
						3.8739	39.92
						3.8906	65.63
						3.8906	66.84
						3.8906	63.05
						3.9072	66.8
						3.9072	71.4
						3.9072	72.3
						3.9239	74.92
						3.9239	77.6
						3.9239	74.38
						3.9406	77.66
						3.9406	80.52
						3.9406	80.15
						3.9572	69.69
						3.9572	76.92
						3.9572	80.87
						3.9739	41.48
						3.9739	46.03
						3.9739	45.79
						3.9906	39.89
						3.9906	37.75
						3.9906	38.32
						4.0072	66.8
						4.0072	68.27
						4.0072	65.38
						4.0239	69.39
						4.0239	70.43
						4.0239	71.44
						4.0406	76.13
						4.0406	77.39
						4.0406	73.22
						4.0572	77.84
						4.0572	80.37
						4.0572	79.51
						4.0739	80.3
						4.0739	82.59
						4.0739	81.57
						4.0906	62.37
						4.0906	69.63
						4.0906	72.68
						4.1072	40.79
						4.1072	43.89
						4.1072	43.46
						4.1239	37.68
						4.1239	36.18
						4.1239	37.96
						4.1406	64.86
						4.1406	66.67
						4.1406	61.24
						4.1572	65.8
						4.1572	67.79
						4.1572	69.69
						4.1739	74.67
						4.1739	76.69
						4.1739	69.78
						4.1906	77.23
						4.1906	79.82
						4.1906	78.44
						4.2072	46.84
						4.2072	52.34
						4.2072	53.77
						4.2239	36.49
						4.2239	38.52
						4.2239	39.52
						4.2406	54.5
						4.2406	46.34
						4.2406	36.75
						4.2572	62.5
						4.2572	68.05
						4.2572	67.26
						4.2739	70.87
						4.2739	69.67
						4.2739	68.22
						4.2906	74.87
						4.2906	77.95
						4.2906	76.02
						4.3072	77.65
						4.3072	80.66
						4.3072	79.85
						4.3239	80.48
						4.3239	82.46
						4.3239	81.9
						4.3406	32.9
						4.3406	46.4
						4.3406	47.98
						4.3572	12.64
						4.3572	37.36
						4.3572	38.13
						4.3739	19.78
						4.3739	68
						4.3739	65.45
						4.3906	9.97
						4.3906	73.54
						4.3906	69.63
						4.4072	10.14
						4.4072	78.43
						4.4072	76.91
						4.4239	48.13
						4.4239	80.62
						4.4239	80.07
						4.4406	71.43
						4.4406	82.35
						4.4406	81.89
						4.4572	35.89
						4.4572	47.31
						4.4572	46.83
						4.5056	37.45
						4.5056	36.12
						4.5056	38.28
						4.5136	72.19
						4.5136	76.15
						4.5136	68.9
						4.5303	76.42
						4.5303	78.42
						4.5303	77.77
						4.5469	78.79
						4.5469	79.74
						4.5469	80.4
						4.5636	80.66
						4.5636	81.23
						4.5636	81.9
						4.5803	53.89
						4.5803	59.17
						4.5803	62.71
						4.5969	25.4
						4.5969	39.19
						4.5969	40.43
						4.6136	19.95
						4.6136	43.5
						4.6136	35.32
						4.6303	20.06
						4.6303	67.63
						4.6303	66.31
						4.6469	15.84
						4.6469	74.58
						4.6469	65.68
						4.6636	11.31
						4.6636	78.62
						4.6636	76.14
						4.6803	37.09
						4.6803	79.67
						4.6803	79.89
						4.6969	66.93
						4.6969	80.85
						4.6969	82.03
						4.7136	77.64
						4.7136	82.21
						4.7136	82.74
						4.7303	44.95
						4.7303	51.74
						4.7303	56.85
						4.7469	35.08
						4.7469	38.12
						4.7469	39.92
						4.7636	65.48
						4.7636	64.46
						4.7636	62.86
						4.7803	74.37
						4.7803	70.98
						4.7803	71.16
						4.7969	78.15
						4.7969	79.32
						4.7969	77.88
						4.8136	80.29
						4.8136	80.98
						4.8136	79.83
						4.8303	65.95
						4.8303	73.7
						4.8303	77.89
						4.8469	21.15
						4.8469	38.72
						4.8469	41.66
						4.8636	8.18
						4.8636	33.18
						4.8636	33.99
						4.8803	14.1
						4.8803	64.01
						4.8803	62.24
						4.8969	3.02
						4.8969	66.52
						4.8969	66.85
						4.9136	1.83
						4.9136	75.73
						4.9136	75.42
						4.9303	1.4
						4.9303	72.51
						4.9303	77.54
						4.9469	1.11
						4.9469	37.82
						4.9469	40.86
						4.9636	0.91
						4.9636	28.33
						4.9636	33.05
						4.9803	0.74
						4.9803	60.56
						4.9803	56.42
						4.9969	1.66
						4.9969	63.23
						4.9969	67.01
						5.0136	3.86
						5.0136	73.96
						5.0136	72.32
						5.0303	51.52
						5.0303	77.45
						5.0303	77.99
						5.0469	47.73
						5.0469	58.6
						5.0469	64.12
						5.0636	25.89
						5.0636	35.86
						5.0636	38.91
						5.0803	21.91
						5.0803	29.73
						5.0803	33.05
						5.0969	56.09
						5.0969	62.24
						5.0969	61.11
						5.1136	66.62
						5.1136	62.74
						5.1136	64.13
						5.1303	68.24
						5.1303	73.92
						5.1303	72.76
						5.1469	57.56
						5.1469	68.45
						5.1469	74.11
						5.1636	11.49
						5.1636	36.07
						5.1636	38.41
						5.1803	2.9
						5.1803	25.93
						5.1803	31.73
						5.1969	1.82
						5.1969	60.2
						5.1969	54.53
						5.2136	1.29
						5.2136	63.58
						5.2136	63.98
						5.2303	0.96
						5.2303	75.04
						5.2303	69.9
						5.2469	0.71
						5.2469	77.24
						5.2469	76.16
						5.2636	0.55
						5.2636	42.41
						5.2636	40.48
						5.2803	0.42
						5.2803	29.71
						5.2803	31.09
						5.2969	1.13
						5.2969	35.15
						5.2969	34.07
						5.3136	12.11
						5.3136	61.53
						5.3136	62.04
						5.3303	36.53
						5.3303	62.01
						5.3303	60.66
						5.3469	55.56
						5.3469	74.54
						5.3469	73.95
						5.3636	50.6
						5.3636	69.99
						5.3636	76.94
						5.3803	8.97
						5.3803	33.06
						5.3803	34.62
						5.3969	1.95
						5.3969	19.91
						5.3969	25.76
						5.4136	1.13
						5.4136	38.16
						5.4136	33.18
						5.4303	0.74
						5.4303	53.68
						5.4303	58.86
						5.4469	0.47
						5.4469	54.84
						5.4469	57.45
						5.4636	0.32
						5.4636	70.02
						5.4636	72.08
						5.4803	0.22
						5.4803	27.1
						5.4803	35
						5.4969	0.1
						5.4969	16.86
						5.4969	25.04
						5.5136	0.04
						5.5136	28.71
						5.5136	26.14
						5.5303	0.05
						5.5303	54.66
						5.5303	59.81
						5.5469	0.01
						5.5469	48.39
						5.5469	58.96
						5.5636	4.99
						5.5636	60.56
						5.5636	72.39
						5.5803	7.27
						5.5803	18.67
						5.5803	35.72
						5.5969	0.93
						5.5969	3.74
						5.5969	24.69
						5.6136	0.16
						5.6136	2.39
						5.6136	21.59
						5.6303	0.02
						5.6303	1.77
						5.6303	45.51
						5.6469	0
						5.6469	1.41
						5.6469	57.92
						5.6636	0
						5.6636	1.12
						5.6636	57.47
						5.6803	0
						5.6803	0.92
						5.6803	73.36
						5.6969	0
						5.6969	0.76
						5.6969	37.89
						5.7136	0
						5.7136	1.36
						5.7136	20.58
						5.7303	0
						5.7303	2.83
						5.7303	16.47
						5.7469	0
						5.7469	4.66
						5.7469	44
						5.7636	0
						5.7636	19.25
						5.7636	55.12
						5.7803	0
						5.7803	48.02
						5.7803	60.74
						5.7969	0
						5.7969	47.28
						5.7969	54.31
						5.8136	0
						5.8136	9.17
						5.8136	20.32
						5.8303	0
						5.8303	5.15
						5.8303	17.63
						5.8469	0
						5.8469	5.62
						5.8469	13.25
						5.8636	0
						5.8636	32.32
						5.8636	52.6
						5.8803	5.73
						5.8803	51.6
						5.8803	55.16
						5.8969	8.24
						5.8969	48.96
						5.8969	54.61
						5.9136	10.38
						5.9136	12.99
						5.9136	18.56
						5.9303	4.84
						5.9303	5.58
						5.9303	16.18
						5.9469	0.23
						5.9469	5.93
						5.9469	8.45
						5.9636	9.99
						5.9636	33.67
						5.9636	50.78
						5.9803	11.89
						5.9803	52.16
						5.9803	54.81
						5.9969	12.55
						5.9969	53.8
						5.9969	67.15
						6.0136	1.86
						6.0136	36.29
						6.0136	40.05
						6.0303	0.21
						6.0303	10.01
						6.0303	15.04
						6.0469	0
						6.0469	6.42
						6.0469	13.31
						6.0636	0
						6.0636	13
						6.0636	9.09
						6.0803	0
						6.0803	45.29
						6.0803	50.93
						6.0969	0
						6.0969	49.48
						6.0969	53.01
						6.1136	0
						6.1136	40.91
						6.1136	55.22
						6.1303	0
						6.1303	9.56
						6.1303	15.33
						6.1469	0
						6.1469	7.14
						6.1469	11.81
						6.1636	0
						6.1636	10.43
						6.1636	8.82
						6.1803	0
						6.1803	45.75
						6.1803	36.95
						6.1969	0
						6.1969	48.33
						6.1969	50.56
						6.2136	0
						6.2136	44.8
						6.2136	56.52
						6.2303	0
						6.2303	10.08
						6.2303	13.85
						6.2469	0
						6.2469	6.72
						6.2469	11.24
						6.2636	0
						6.2636	5.55
						6.2636	4.53
						6.2803	0
						6.2803	41.2
						6.2803	37
						6.2969	0
						6.2969	47.07
						6.2969	49.77
						6.3136	0
						6.3136	49.14
						6.3136	64
						6.3303	0
						6.3303	37.48
						6.3303	42.88
						6.3469	0
						6.3469	7.38
						6.3469	11.42
						6.3636	0
						6.3636	5.4
						6.3636	11.46
						6.3803	0
						6.3803	18
						6.3803	9.07
						6.3969	0
						6.3969	44.78
						6.3969	45.15
						6.4136	0
						6.4136	44.35
						6.4136	45.49
						6.4303	5.39
						6.4303	61.15
						6.4303	65.01
						6.4469	12.18
						6.4469	10.16
						6.4469	16.67
						6.4636	6.17
						6.4636	5.67
						6.4636	9.4
						6.4803	20.85
						6.4803	6.28
						6.4803	5.73
						6.4969	26.91
						6.4969	37.73
						6.4969	38.93
						6.5136	31.19
						6.5136	43.48
						6.5136	42.97
						6.5303	36.13
						6.5303	58.22
						6.5303	63.05
						6.5469	38.59
						6.5469	36.29
						6.5469	44.53
						6.5636	36.46
						6.5636	6.22
						6.5636	8.51
						6.5803	23.89
						6.5803	3.84
						6.5803	8.79
						6.5969	41.12
						6.5969	13.25
						6.5969	12.31
						6.6136	32.64
						6.6136	38.87
						6.6136	42.23
						6.6303	18.94
						6.6303	40.28
						6.6303	56.47
						6.6469	5.32
						6.6469	60.44
						6.6469	64.35
						6.6636	1.35
						6.6636	22.29
						6.6636	31.83
						6.6803	0.73
						6.6803	4.72
						6.6803	7.92
						6.6969	0.46
						6.6969	3.73
						6.6969	8.47
						6.7136	3.75
						6.7136	26.1
						6.7136	24.88
						6.7303	32.8
						6.7303	42.22
						6.7303	41.47
						6.7469	39.8
						6.7469	50.62
						6.7469	60.35
						6.7636	37.46
						6.7636	39.9
						6.7636	46.57
						6.7803	23.16
						6.7803	3.89
						6.7803	8.89
						6.7969	8.78
						6.7969	1.85
						6.7969	7.88
						6.8136	1.5
						6.8136	1.23
						6.8136	12.48
						6.8303	0.74
						6.8303	17.71
						6.8303	40.68
						6.8469	0.46
						6.8469	36.49
						6.8469	55.95
						6.8636	0.29
						6.8636	43.85
						6.8636	63.56
						6.8803	0.18
						6.8803	58.1
						6.8803	68.48
						6.8969	0.06
						6.8969	18.13
						6.8969	27.67
						6.9136	0.01
						6.9136	3.97
						6.9136	6.65
						6.9303	0
						6.9303	1.65
						6.9303	6.76
						6.9469	0
						6.9469	21.7
						6.9469	29.33
						6.9636	0
						6.9636	44.91
						6.9636	40.05
						6.9803	0
						6.9803	44.29
						6.9803	59.72
						6.9969	0
						6.9969	60.84
						6.9969	65.95
						7.0136	0
						7.0136	5.18
						7.0136	14.9
						7.0303	0
						7.0303	2.09
						7.0303	7.13
						7.0469	0
						7.0469	1.32
						7.0469	6.25
						7.0636	14.71
						7.0636	25.3
						7.0636	40.51
						7.0803	5.41
						7.0803	41.49
						7.0803	52.27
						7.0969	0.27
						7.0969	44.29
						7.0969	61.09
						7.1136	0
						7.1136	20.6
						7.1136	23.53
						7.1303	0
						7.1303	3.03
						7.1303	4.73
						7.1469	0
						7.1469	1.41
						7.1469	4.25
						7.1636	0
						7.1636	20.46
						7.1636	25.83
						7.1803	0
						7.1803	42.96
						7.1803	42.08
						7.1969	0
						7.1969	45.72
						7.1969	58.03
						7.2136	0
						7.2136	20.17
						7.2136	29.66
						7.2303	0
						7.2303	2.64
						7.2303	4.45
						7.2469	0
						7.2469	1.35
						7.2469	4.5
						7.2636	0
						7.2636	0.85
						7.2636	18.82
						7.2803	0
						7.2803	21.68
						7.2803	40.51
						7.2969	0
						7.2969	42.48
						7.2969	56.99
						7.3136	0
						7.3136	45.64
						7.3136	63.2
						7.3303	0
						7.3303	16.16
						7.3303	22.89
						7.3469	0
						7.3469	2.31
						7.3469	4.55
						7.3636	0
						7.3636	1.19
						7.3636	3.98
						7.3803	0
						7.3803	15.65
						7.3803	32.4
						7.3969	12.03
						7.3969	42.74
						7.3969	40.97
						7.4136	18.71
						7.4136	46.32
						7.4136	58.32
						7.4303	8.27
						7.4303	31.18
						7.4303	38.03
						7.4469	0.58
						7.4469	3.11
						7.4469	4.95
						7.4636	0
						7.4636	1.4
						7.4636	3.83
						7.4803	25.73
						7.4803	12.62
						7.4803	19.37
						7.4969	31.08
						7.4969	38.4
						7.4969	42.37
						7.5136	33.94
						7.5136	47.35
						7.5136	54.06
						7.5303	36.42
						7.5303	39.59
						7.5303	55.85
						7.5469	37.22
						7.5469	3.32
						7.5469	6.27
						7.5636	22.32
						7.5636	1.45
						7.5636	3.64
						7.5803	6.55
						7.5803	11.54
						7.5803	10.23
						7.5969	36.4
						7.5969	38.66
						7.5969	40.85
						7.6136	41.52
						7.6136	46.65
						7.6136	51.59
						7.6303	44.18
						7.6303	45.9
						7.6303	61.63
						7.6469	34.68
						7.6469	27.39
						7.6469	38.42
						7.6636	19.09
						7.6636	2.72
						7.6636	4.41
						7.6803	4.98
						7.6803	1.34
						7.6803	2.78
						7.6969	1.11
						7.6969	18.86
						7.6969	23.99
						7.7136	0.6
						7.7136	19.22
						7.7136	41.29
						7.7303	0.31
						7.7303	37.84
						7.7303	54.71
						7.7469	0.12
						7.7469	40.82
						7.7469	63.27
						7.7636	0.01
						7.7636	4.05
						7.7636	7.07
						7.7803	0
						7.7803	1.3
						7.7803	2.85
						7.7969	0
						7.7969	2.57
						7.7969	0.82
						7.8136	0
						7.8136	35.05
						7.8136	36.01
						7.8303	0
						7.8303	46.33
						7.8303	42.9
						7.8469	0
						7.8469	47.16
						7.8469	59.97
						7.8636	0
						7.8636	45.81
						7.8636	66.78
						7.8803	0
						7.8803	57.49
						7.8803	72.17
						7.8969	0
						7.8969	4.37
						7.8969	10.72
						7.9136	0
						7.9136	1.81
						7.9136	2.77
						7.9303	0
						7.9303	1.1
						7.9303	8.65
						7.9469	0
						7.9469	16.09
						7.9469	39.11
						7.9636	0
						7.9636	20.97
						7.9636	51.47
						7.9803	0
						7.9803	42.84
						7.9803	61.49
						7.9969	0
						7.9969	39.93
						7.9969	56.52
						8.0136	0
						8.0136	3.03
						8.0136	5.06
						8.0303	0
						8.0303	1.2
						8.0303	1.61
						8.0469	0
						8.0469	1.92
						8.0469	15.76
						8.0636	11.53
						8.0636	11.88
						8.0636	38.87
						8.0803	23.53
						8.0803	13.22
						8.0803	52.51
						8.0969	21.66
						8.0969	20.06
						8.0969	62.14
						8.1136	5.59
						8.1136	2.31
						8.1136	8.19
						8.1303	0.48
						8.1303	0.72
						8.1303	1.66
						8.1469	0.05
						8.1469	0.35
						8.1469	3.72
						8.1636	0
						8.1636	10.2
						8.1636	37.65
						8.1803	0
						8.1803	11.16
						8.1803	40.81
						8.1969	0
						8.1969	39.69
						8.1969	59.43
						8.2136	0
						8.2136	6.48
						8.2136	10.46
						8.2303	0
						8.2303	1.21
						8.2303	1.73
						8.2469	0
						8.2469	0.49
						8.2469	0.84
						8.2636	0
						8.2636	19.18
						8.2636	8.04
						8.2803	0
						8.2803	40.48
						8.2803	36.43
						8.2969	0
						8.2969	47.99
						8.2969	56.98
						8.3136	0
						8.3136	47.88
						8.3136	63.59
						8.3303	0
						8.3303	5.47
						8.3303	7.05
						8.3469	0
						8.3469	1.58
						8.3469	1.47
						8.3636	0
						8.3636	0.83
						8.3636	6.25
						8.3803	0
						8.3803	2.65
						8.3803	36.75
						8.3969	0
						8.3969	27.6
						8.3969	42.41
						8.4136	0
						8.4136	39.95
						8.4136	60.04
						8.4303	0
						8.4303	10.72
						8.4303	16.53
						8.4469	0
						8.4469	1.48
						8.4469	1.83
						8.4636	10.1
						8.4636	0.73
						8.4636	1.83
						8.4803	26.91
						8.4803	0.34
						8.4803	27.17
						8.4969	31.09
						8.4969	0.18
						8.4969	36.83
						8.5136	33.52
						8.5136	12.37
						8.5136	52.45
						8.5303	30.28
						8.5303	27.07
						8.5303	39.35
						8.5469	11.65
						8.5469	1.42
						8.5469	2.31
						8.5636	1.88
						8.5636	0.41
						8.5636	0.92
						8.5803	0.45
						8.5803	0.16
						8.5803	0.68
						8.7142	0
						8.7142	0
						8.7142	3.06
						8.7169	0
						8.7169	0
						8.7169	1.22
						8.7208	0
						8.7208	0.06
						8.7208	0.72
						8.7383	0
						8.7383	17.67
						8.7383	39.5
						8.7561	0
						8.7561	52.46
						8.7561	27.46
						8.7728	0
						8.7728	38.71
						8.7728	20.22
						8.7894	0
						8.7894	35.38
						8.7894	38.6
						8.8061	0
						8.8061	45.22
						8.8061	62.17
						8.8228	0
						8.8228	50
						8.8228	68.39
						8.8394	0
						8.8394	59.2
						8.8394	78.21
						8.8561	0
						8.8561	44.01
						8.8561	72.09
						8.8728	0
						8.8728	34.64
						8.8728	81.07
						8.8894	0
						8.8894	39.94
						8.8894	83.41
						8.9061	0
						8.9061	30.91
						8.9061	79.73
						8.9228	0
						8.9228	45.42
						8.9228	74.86
						8.9394	0
						8.9394	48.17
						8.9394	72.67
						8.9561	0
						8.9561	54.19
						8.9561	76.86
						8.9728	0
						8.9728	43.13
						8.9728	70.84
						8.9894	42.2
						8.9894	68.06
						8.9894	64.09
						9.0061	49.43
						9.0061	62.15
						9.0061	75.78
						9.0228	52.02
						9.0228	75.32
						9.0228	71.08
						9.0394	53.49
						9.0394	72.91
						9.0394	73.25
						9.0561	54.09
						9.0561	65.37
						9.0561	85.03
						9.0728	54.78
						9.0728	73.02
						9.0728	86.15
						9.0894	55.19
						9.0894	80.97
						9.0894	86.72
						9.1061	55.24
						9.1061	77.57
						9.1061	86.78
						9.1228	55.62
						9.1228	82.17
						9.1228	87.15
						9.1394	55.42
						9.1394	79.22
						9.1394	87.37
						9.1561	55.41
						9.1561	82.89
						9.1561	87.51
						9.1728	55.04
						9.1728	83.26
						9.1728	87.6
						9.1894	47.88
						9.1894	78.03
						9.1894	87.99
						9.2061	38.26
						9.2061	74.82
						9.2061	87.86
						9.2228	59.41
						9.2228	69.69
						9.2228	88.18
						9.2394	61.02
						9.2394	64.96
						9.2394	88.05
						9.2561	61.99
						9.2561	82.94
						9.2561	88.39
						9.2728	62.52
						9.2728	81.82
						9.2728	88.19
						9.2894	63.01
						9.2894	78.09
						9.2894	88.53
						9.3061	63.48
						9.3061	85.76
						9.3061	88.77
						9.3228	65.31
						9.3228	85.09
						9.3228	88.81
						9.3394	66.09
						9.3394	82.99
						9.3394	88.88
						9.3561	66.69
						9.3561	87.27
						9.3561	88.81
						9.3728	67.55
						9.3728	88.15
						9.3728	88.74
						9.3894	67.93
						9.3894	88.3
						9.3894	89.03
						9.4061	68.66
						9.4061	88.75
						9.4061	88.94
						9.4228	69.8
						9.4228	84.67
						9.4228	89.15
						9.4394	70.47
						9.4394	87.05
						9.4394	89.43
						9.4561	71.52
						9.4561	85.71
						9.4561	89.03
						9.4728	72.62
						9.4728	85.01
						9.4728	88.97
						9.4894	73.73
						9.4894	88.37
						9.4894	89.61
						9.5061	74.71
						9.5061	85.71
						9.5061	89.23
						9.5228	75.45
						9.5228	86.13
						9.5228	89.44
						9.5394	76
						9.5394	86.41
						9.5394	89.4
						9.5561	76.78
						9.5561	18.08
						9.5561	19.24
						9.5728	72.99
						9.5728	7.76
						9.5728	3.55
						9.5894	67.05
						9.5894	30.12
						9.5894	2.31
						9.6061	60.74
						9.6061	55.32
						9.6061	40.72
						9.6228	54.82
						9.6228	56.1
						9.6228	55.01
						9.6394	49
						9.6394	68.81
						9.6394	68.36
						9.6561	43.05
						9.6561	56.83
						9.6561	59.08
						9.6728	37.37
						9.6728	6.14
						9.6728	6.95
						9.6894	31.57
						9.6894	3.14
						9.6894	2.15
						9.7061	25.98
						9.7061	15.4
						9.7061	4.25
						9.7228	20.41
						9.7228	49.96
						9.7228	39.12
						9.7394	15.06
						9.7394	33.27
						9.7394	52.57
						9.7561	10.1
						9.7561	50.18
						9.7561	66.32
						9.7728	4.87
						9.7728	45.33
						9.7728	58.95
						9.7894	1.61
						9.7894	8.95
						9.7894	5.21
						9.8061	1.16
						9.8061	2.6
						9.8061	1.87
						9.8228	0.92
						9.8228	1.72
						9.8228	1.2
						9.8394	0.75
						9.8394	1.28
						9.8394	0.9
						9.8561	0.61
						9.8561	1.03
						9.8561	0.72
						9.8728	0.5
						9.8728	0.83
						9.8728	0.65
						9.8894	0.39
						9.8894	0.74
						9.8894	0.54
						9.9061	0.35
						9.9061	0.58
						9.9061	0.52
						9.9228	0.29
						9.9228	0.53
						9.9228	0.46
						9.9394	0.22
						9.9394	0.44
						9.9394	0.53
						9.9561	0.14
						9.9561	0.39
						9.9561	0.38
						9.9728	0.12
						9.9728	0.28
						9.9728	0.33
						9.9894	0.05
						9.9894	0.37
						9.9894	0.26
						10.0061	0
						10.0061	0.71
						10.0061	0.21
						10.0228	0
						10.0228	0.2
						10.0228	0.19
						10.0394	0
						10.0394	0.18
						10.0394	0.18
						10.0561	0
						10.0561	0.15
						10.0561	0.17
						10.0728	0
						10.0728	0.06
						10.0728	0.21
						10.0894	0
						10.0894	0.08
						10.0894	0.19
						10.1061	0
						10.1061	0.04
						10.1061	0.22
						10.1228	0
						10.1228	0.03
						10.1228	0.19
						10.1394	0
						10.1394	0.02
						10.1394	0.19
						10.1561	0
						10.1561	0
						10.1561	0.17
						10.1728	0
						10.1728	0
						10.1728	0.16
						10.1894	0
						10.1894	0
						10.1894	0.13
						10.2061	0
						10.2061	0
						10.2061	0.16
						10.2228	0
						10.2228	0
						10.2228	0.16
						10.2397	0
						10.2397	0
						10.2397	0.16
						10.2561	0
						10.2561	0
						10.2561	0.11
						10.2728	0
						10.2728	0
						10.2728	0.13
						10.2894	0
						10.2894	0
						10.2894	0.14
						10.3061	0
						10.3061	0
						10.3061	0.13
						10.3228	0
						10.3228	0
						10.3228	0.17
						10.3394	0
						10.3394	0
						10.3394	0.17
						10.3561	0
						10.3561	0
						10.3561	0.11
						10.3728	0
						10.3728	0
						10.3728	0.16
						10.3894	0
						10.3894	0
						10.3894	0.14
						10.4061	0
						10.4061	0
						10.4061	0.13
						10.4228	0
						10.4228	0.01
						10.4228	0.11
						10.4394	0
						10.4394	0.01
						10.4394	0.12
						10.4561	0
						10.4561	0
						10.4561	0.11
						10.4728	0
						10.4728	0
						10.4728	0.12
						10.4894	0
						10.4894	0
						10.4894	0.08
						10.5061	0
						10.5061	0
						10.5061	0.13
						10.5228	0
						10.5228	0.01
						10.5228	0.11
						10.5394	0
						10.5394	0.03
						10.5394	0.09
						10.5561	0
						10.5561	0
						10.5561	0.11
						10.5728	0
						10.5728	0
						10.5728	0.1
						10.5894	0
						10.5894	0
						10.5894	0.13
						10.6061	0
						10.6061	0.02
						10.6061	25.86
						10.6228	0
						10.6228	0
						10.6228	16.39
						10.6394	0
						10.6394	0.06
						10.6394	0.87
						10.6561	0
						10.6561	0
						10.6561	0.51
						10.6728	0
						10.6728	0.02
						10.6728	10
						10.6894	0
						10.6894	0.02
						10.6894	18.73
						10.7061	0
						10.7061	0
						10.7061	1.21
						10.7228	0
						10.7228	0.01
						10.7228	0.64
						10.7394	0
						10.7394	0.04
						10.7394	10.85
						10.7561	0
						10.7561	0
						10.7561	0.5
						10.7728	0
						10.7728	0.01
						10.7728	0.38
						10.7894	0
						10.7894	0.06
						10.7894	39.05
						10.8061	0
						10.8061	0.08
						10.8061	11.95
						10.8228	0
						10.8228	0.11
						10.8228	1.12
						10.8394	0
						10.8394	0.04
						10.8394	0.72
						10.8561	0
						10.8561	0.07
						10.8561	39.2
						10.8728	0
						10.8728	0.06
						10.8728	35.03
						10.8894	0
						10.8894	0.04
						10.8894	11.64
						10.9061	0
						10.9061	0.09
						10.9061	37.76
						10.9228	0
						10.9228	0.05
						10.9228	45.49
						10.9394	0
						10.9394	0.08
						10.9394	37.91
						10.9561	0
						10.9561	0.06
						10.9561	14.91
						10.9728	0
						10.9728	0.08
						10.9728	45.99
						10.9894	0
						10.9894	0.1
						10.9894	51.2
						11.0061	0
						11.0061	0.07
						11.0061	39.11
						11.0228	0
						11.0228	0.06
						11.0228	27.22
						11.0394	0
						11.0394	0.07
						11.0394	41.19
						11.0561	0
						11.0561	0.12
						11.0561	24.39
						11.0728	0
						11.0728	0.12
						11.0728	63.22
						11.0894	0
						11.0894	0.09
						11.0894	50.27
						11.1061	0
						11.1061	0.08
						11.1061	69.44
						11.1228	0
						11.1228	0.1
						11.1228	73.82
						11.1394	0
						11.1394	0.09
[truncated: 370 more rows]

## Sheet: Strain 8
Escherichia coli BW25113 ΔglcB
Biomass		Acetate		Glucose		DOT
Time [h]	Values [g/L]	Time [h]	Values [g/L]	Time [h]	Values [g/L]	Time [h]	Values [%]
0.0792	2.56591	0.5603	0.392111	0.5603	3.80874	0.0069	91.19
0.0792	2.49318	0.5603	0.409127	0.5603	3.77247	0.0069	92.6
0.1156	2.23864	0.8592	0.393057	0.8592	2.40737	0.0069	91
0.1156	2.35985	0.8592	0.394002	0.8592	2.3439	0.0097	91.05
0.1522	2.03258	1.1567	0.35997	1.1567	1.24042	0.0097	92.09
0.1522	2.15379	1.1567	0.380767	1.1567	1.11479	0.0097	91.33
0.5603	2.67273	1.4631	0.417635	1.4631	4.15325	0.0125	91.27
0.5603	2.52727	1.4631	0.399674	1.4631	4.26593	0.0125	91.78
0.8592	3.18182	1.7622	0.475301	1.7622	2.91378	0.0125	91.27
0.8592	2.91515	1.7622	0.401565	1.7622	3.21037	0.0153	90.93
1.1567	2.84242	2.0658	0.474491	2.0658	0.0249718	0.0153	92.52
1.1567	2.50303	2.0658	0.449504	2.0658	0.0343465	0.0153	91.07
1.4631	3.88485	2.4069	0.419681	2.4069	0.020954	0.0181	92.45
1.4631	4.17576	2.4069	0.405979	2.4069	0.0303287	0.0181	93.12
1.7622	3.98182	2.7531	0.0553568	2.7531	0.0236325	0.0181	92.13
1.7622	3.95758	2.7531	0.0787316	2.7531	0.0236325	0.0219	91.53
2.0658	4.22727	3.1097	0.0360121	3.1097	0.0115793	0.0219	94.37
2.0658	3.75455	3.4567	0.139184	3.1097	0.0276502	0.0219	92.98
2.4069	5.39091	3.4567	0.133542	3.4567	0.026311	0.0394	91.88
2.4069	5.17273	3.7817	0.0903019	3.4567	0.020954	0.0394	92.76
2.7531	5.24545	3.7817	0.106107	3.7817	0.028915	0.0394	92.23
2.7531	5.75455	4.1256	0.140879	3.7817	0.033888	0.0572	91.1
3.1097	4.7	4.1256	0.127181	4.1256	0.0177258	0.0572	92.17
3.1097	4.44545	4.4836	0.101892	4.1256	0.0301582	0.0572	90.81
3.4567	5.53636	4.4836	0.128235	4.4836	0.0214555	0.0739	91.03
3.4567	5.42727	4.8667	0.0955703	4.4836	0.023942	0.0739	91.8
3.7817	5.31591	4.8667	0.0997851	4.8667	0.0152393	0.0739	91.28
3.7817	5.60682	5.1833	0.142986	4.8667	0.0276718	0.0906	89.31
4.1256	5.49773	5.1833	0.127181	5.1833	0.0214555	0.0906	92.23
4.1256	5.24318	5.5056	0.241017	5.1833	0.033888	0.0906	91.03
4.4836	6.47955	5.8308	0.0105966	5.5056	0.0049998	0.1072	90.36
4.4836	6.40682	5.8308	0.161562	5.5056	0.0482848	0.1072	92.04
4.8667	5.78864	6.1489	0.0693935	5.8308	0.0807486	0.1072	91.16
4.8667	5.78864	6.1489	0.181425	6.1489	0.0969805	0.1239	90.72
5.1833	5.89773	6.4694	0.120245	6.4694	0.17814	0.1239	89.95
5.1833	6.00682	6.4694	0.247373	6.8183	0.000941822	0.1239	91.36
5.5056	7.60909	6.8183	0.162356	6.8183	0.298527	0.1406	90.87
6.1489	6.7	7.1431	0.184854	7.1431	0.0160116	0.1406	92.03
6.4694	8.00909	7.4639	0.304835	7.1431	0.0503152	0.1406	91.5
6.8183	7.86364	7.7864	0.302264	7.4639	0.0579382	0.1572	91.23
7.7864	10.4068	8.1381	0.124006	7.7864	0.00076558	0.1572	91.88
8.1381	9.13409	8.1381	0.201137	7.7864	0.0376102	0.1572	91.45
8.4594	10.4068	8.4594	0.399962	8.1381	0.0439627	0.1739	91.19
12.9364	16.7992	8.4594	0.329688	8.4594	0.00330659	0.1739	91.67
12.9711	14.3144	12.9364	0.287117	8.4594	0.00965911	0.1739	91.31
13.0061	12.6174	12.9364	0.190914	12.9364	0.0125442	0.1906	91.09
		12.9711	0.521614	12.9364	3.50881	0.1906	92.41
		13.0061	0.555114	12.9711	0.00747716	0.1906	91.17
		13.0061	0.590331	12.9711	0.0163445	0.2072	91.09
				13.0061	0.00747716	0.2072	92.1
				13.0061	3.14398	0.2072	90.85
						0.2239	91.34
						0.2239	91.85
						0.2239	91.32
						0.2406	91.19
						0.2406	92.22
						0.2406	91.13
						0.2572	91.07
						0.2572	92.23
						0.2572	91.2
						0.2739	91.05
						0.2739	92.48
						0.2739	91.39
						0.2906	91.05
						0.2906	92.44
						0.2906	91.02
						0.3072	91.21
						0.3072	91.86
						0.3072	91.26
						0.3239	88.26
						0.3239	90.53
						0.3239	90.62
						0.3406	77.36
						0.3406	76.67
						0.3406	82.89
						0.3572	75.43
						0.3572	74.67
						0.3572	80.54
						0.3739	74.52
						0.3739	73.82
						0.3739	79.67
						0.3906	74.36
						0.3906	73.36
						0.3906	79.72
						0.4072	74.2
						0.4072	72.84
						0.4072	79.85
						0.4239	74.37
						0.4239	72.77
						0.4239	79.07
						0.4406	74.22
						0.4406	71.49
						0.4406	78.93
						0.4572	73.63
						0.4572	71.63
						0.4572	79.07
						0.4739	73.65
						0.4739	71.74
						0.4739	79.62
						0.4906	73.31
						0.4906	70.91
						0.4906	80
						0.5072	73.12
						0.5072	70.94
						0.5072	79.1
						0.5239	72.9
						0.5239	70.29
						0.5239	78.02
						0.5406	72.94
						0.5406	69.86
						0.5406	78.09
						0.5572	72.02
						0.5572	69.59
						0.5572	77.3
						0.5739	71.96
						0.5739	69.17
						0.5739	76.84
						0.5906	71.45
						0.5906	68.35
						0.5906	76.53
						0.6072	70.99
						0.6072	67.84
						0.6072	76.45
						0.6239	71.08
						0.6239	67.87
						0.6239	76.53
						0.6406	71.08
						0.6406	67.05
						0.6406	76.42
						0.6572	70.52
						0.6572	67.52
						0.6572	76.37
						0.6739	70.74
						0.6739	66.86
						0.6739	76.34
						0.6906	70.68
						0.6906	66.69
						0.6906	76.07
						0.7072	70.35
						0.7072	66.28
						0.7072	75.92
						0.7239	70.32
						0.7239	66.09
						0.7239	75.54
						0.7406	69.66
						0.7406	66.34
						0.7406	75.46
						0.7572	69.75
						0.7572	65.63
						0.7572	75.47
						0.7739	69.72
						0.7739	65.75
						0.7739	75.66
						0.7906	69.3
						0.7906	65.95
						0.7906	75.8
						0.8072	69.22
						0.8072	65.62
						0.8072	76.17
						0.8239	69.14
						0.8239	66.08
						0.8239	76.15
						0.8406	69.45
						0.8406	65.81
						0.8406	76.45
						0.8572	69.05
						0.8572	66.21
						0.8572	76.63
						0.8739	68.65
						0.8739	66.5
						0.8739	77
						0.8906	68.79
						0.8906	66.81
						0.8906	77.03
						0.9072	68.96
						0.9072	67.06
						0.9072	77.38
						0.9239	69.5
						0.9239	67.12
						0.9239	77.58
						0.9406	69.78
						0.9406	67.72
						0.9406	78
						0.9572	69.9
						0.9572	68.72
						0.9572	77.88
						0.9739	70.6
						0.9739	68.73
						0.9739	78.06
						0.9906	70.95
						0.9906	69.19
						0.9906	78.15
						1.0072	71.16
						1.0072	69.25
						1.0072	78.18
						1.0239	71.71
						1.0239	69.91
						1.0239	77.89
						1.0406	72.29
						1.0406	69.35
						1.0406	78.09
						1.0572	72.67
						1.0572	69.55
						1.0572	77.77
						1.0739	72.74
						1.0739	69.49
						1.0739	77.58
						1.0906	72.79
						1.0906	69.64
						1.0906	77.16
						1.1072	73.08
						1.1072	69.75
						1.1072	76.96
						1.1239	73.25
						1.1239	69.3
						1.1239	76.32
						1.1406	73.31
						1.1406	69.28
						1.1406	75.93
						1.1572	73.11
						1.1572	68.76
						1.1572	75.56
						1.1739	72.71
						1.1739	68.46
						1.1739	75.11
						1.1906	73.26
						1.1906	68.39
						1.1906	74.82
						1.2072	72.55
						1.2072	67.62
						1.2072	74.07
						1.2239	71.97
						1.2239	66.46
						1.2239	74.02
						1.2406	72.15
						1.2406	66.25
						1.2406	73.46
						1.2572	72.19
						1.2572	65.64
						1.2572	73.3
						1.2739	71.49
						1.2739	64.87
						1.2739	73.35
						1.2906	70.94
						1.2906	65
						1.2906	73.37
						1.3072	70.62
						1.3072	63.99
						1.3072	73.39
						1.3239	69.91
						1.3239	64.18
						1.3239	72.85
						1.3406	69.23
						1.3406	63.55
						1.3406	72.9
						1.3572	68.82
						1.3572	62.85
						1.3572	72.84
						1.3739	68.66
						1.3739	63.38
						1.3739	72.8
						1.3906	68.6
						1.3906	62.96
						1.3906	73
						1.4072	72.89
						1.4072	63.69
						1.4072	72.49
						1.4239	79.45
						1.4239	62.4
						1.4239	72.42
						1.4406	71.99
						1.4406	63.01
						1.4406	72.35
						1.4572	70.08
						1.4572	63.17
						1.4572	72.5
						1.4739	69.51
						1.4739	63.42
						1.4739	72.49
						1.4906	69.11
						1.4906	63.09
						1.4906	72.6
						1.5072	68.71
						1.5072	62.9
						1.5072	72.39
						1.5239	68.88
						1.5239	63.18
						1.5239	72.42
						1.5406	68.92
						1.5406	62.6
						1.5406	72.47
						1.5572	68.71
						1.5572	63.18
						1.5572	72.01
						1.5739	68.5
						1.5739	62.97
						1.5739	72.17
						1.5906	68
						1.5906	63.18
						1.5906	71.97
						1.6072	68.07
						1.6072	62.83
						1.6072	71.94
						1.6239	67.72
						1.6239	62.28
						1.6239	71.96
						1.6406	66.63
						1.6406	61.93
						1.6406	71.75
						1.6572	66.03
						1.6572	62.17
						1.6572	71.73
						1.6739	65.87
						1.6739	61.23
						1.6739	71.48
						1.6906	65.66
						1.6906	61.07
						1.6906	71.26
						1.7072	65.73
						1.7072	60.61
						1.7072	70.99
						1.7239	65.63
						1.7239	60.26
						1.7239	70.97
						1.7406	65.05
						1.7406	59.51
						1.7406	70.39
						1.7572	64.51
						1.7572	59.92
						1.7572	70.53
						1.7739	64.7
						1.7739	59.15
						1.7739	70.25
						1.7906	65
						1.7906	58.25
						1.7906	70.01
						1.8072	65.13
						1.8072	57.7
						1.8072	69.92
						1.8239	65.23
						1.8239	58.39
						1.8239	69.85
						1.8406	64.86
						1.8406	57.97
						1.8406	69.06
						1.8572	64.52
						1.8572	57.44
						1.8572	68.92
						1.8739	65.04
						1.8739	55.79
						1.8739	68.69
						1.8906	64.73
						1.8906	56.39
						1.8906	68.54
						1.9072	64.62
						1.9072	55.78
						1.9072	68.33
						1.9239	64.61
						1.9239	55.46
						1.9239	68.17
						1.9406	63.82
						1.9406	55.13
						1.9406	68.13
						1.9572	63.86
						1.9572	54.64
						1.9572	67.35
						1.9739	63.53
						1.9739	53.8
						1.9739	67.44
						1.9906	62.79
						1.9906	53.79
						1.9906	67.36
						2.0072	62.54
						2.0072	53.82
						2.0072	66.8
						2.0239	63.02
						2.0239	52.75
						2.0239	67.22
						2.0406	62.49
						2.0406	53.33
						2.0406	66.64
						2.0572	62.38
						2.0572	52.65
						2.0572	66.82
						2.0739	61.74
						2.0739	53.33
						2.0739	66.58
						2.0906	61.26
						2.0906	51.24
						2.0906	65.85
						2.1072	60.52
						2.1072	51.81
						2.1072	65.39
						2.1239	60.22
						2.1239	52.35
						2.1239	65.05
						2.1406	78.27
						2.1406	51.3
						2.1406	65.73
						2.1572	83.24
						2.1572	51.43
						2.1572	65.29
						2.1739	84.24
						2.1739	51.56
						2.1739	65.53
						2.1906	85.29
						2.1906	61.74
						2.1906	65.3
						2.2072	86.11
						2.2072	76.42
						2.2072	64.77
						2.2239	86.81
						2.2239	78.36
						2.2239	65.1
						2.2406	87.34
						2.2406	78.26
						2.2406	70.73
						2.2572	87.48
						2.2572	79.65
						2.2572	81.32
						2.2739	87.66
						2.2739	80.35
						2.2739	82.46
						2.2906	87.78
						2.2906	81.27
						2.2906	82.66
						2.3072	87.91
						2.3072	82.44
						2.3072	82.65
						2.3239	87.9
						2.3239	83.13
						2.3239	82.8
						2.3406	88.04
						2.3406	83.3
						2.3406	83.15
						2.3572	87.69
						2.3572	85.23
						2.3572	83.01
						2.3739	87.94
						2.3739	84.75
						2.3739	83.6
						2.3906	87.59
						2.3906	85.62
						2.3906	83.76
						2.4072	87.73
						2.4072	85.15
						2.4072	84.09
						2.4239	87.36
						2.4239	85.85
						2.4239	84.49
						2.4406	87.49
						2.4406	85.62
						2.4406	84.58
						2.4572	86.73
						2.4572	85.81
						2.4572	84.93
						2.4739	86.58
						2.4739	85.99
						2.4739	84.89
						2.4906	86.73
						2.4906	85.32
						2.4906	85.77
						2.5072	86.77
						2.5072	85.53
						2.5072	85.95
						2.5239	86.41
						2.5239	85.8
						2.5239	86.35
						2.5406	86.63
						2.5406	86.12
						2.5406	86.28
						2.5572	86.86
						2.5572	85.64
						2.5572	86.62
						2.5739	86.65
						2.5739	86.07
						2.5739	86.8
						2.5906	86.69
						2.5906	85.9
						2.5906	86.62
						2.6072	86.79
						2.6072	85.29
						2.6072	86.54
						2.6239	86.68
						2.6239	85.19
						2.6239	86.68
						2.6406	86.64
						2.6406	85.85
						2.6406	86.3
						2.6572	86.8
						2.6572	85.8
						2.6572	86.3
						2.6739	86.93
						2.6739	85.5
						2.6739	86.23
						2.6906	87.05
						2.6906	85.66
						2.6906	86.31
						2.7072	87.07
						2.7072	85.26
						2.7072	86.51
						2.7239	86.91
						2.7239	85.53
						2.7239	86.07
						2.7406	87.08
						2.7406	85.33
						2.7406	86.04
						2.7572	86.58
						2.7572	84.88
						2.7572	86.42
						2.7739	87.24
						2.7739	85.03
						2.7739	86.09
						2.7906	86.97
						2.7906	84.63
						2.7906	86.16
						2.8072	87.35
						2.8072	84.66
						2.8072	85.99
						2.8239	86.83
						2.8239	85.86
						2.8239	86.06
						2.8406	86.98
						2.8406	88.28
						2.8406	87.77
						2.8572	86.81
						2.8572	88.81
						2.8572	88.93
						2.8739	86.93
						2.8739	89.15
						2.8739	89.3
						2.8906	86.93
						2.8906	89.58
						2.8906	89.14
						2.9072	87
						2.9072	89.3
						2.9072	89.25
						2.9239	87.17
						2.9239	89.48
						2.9239	89.29
						2.9406	87.05
						2.9406	89.6
						2.9406	89.55
						2.9572	86.63
						2.9572	90.16
						2.9572	72.6
						2.9739	86.67
						2.9739	89.96
						2.9739	80.01
						2.9906	86.25
						2.9906	89.55
						2.9906	85.99
						3.0072	86.07
						3.0072	88.78
						3.0072	88.02
						3.0239	85.41
						3.0239	89.3
						3.0239	88.4
						3.0406	85.16
						3.0406	89.7
						3.0406	88.71
						3.0572	84.91
						3.0572	89.52
						3.0572	88.96
						3.0739	66.8
						3.0739	67.77
						3.0739	74.82
						3.0906	72.39
						3.0906	78.11
						3.0906	73.7
						3.1072	84.2
						3.1072	86.25
						3.1072	85.13
						3.1239	85.06
						3.1239	88.19
						3.1239	86.37
						3.1406	84.76
						3.1406	89.27
						3.1406	87.27
						3.1572	84.83
						3.1572	88.75
						3.1572	87.27
						3.1739	84.94
						3.1739	89.73
						3.1739	87.95
						3.1906	62.55
						3.1906	62.63
						3.1906	70.58
						3.2072	82.93
						3.2072	84.52
						3.2072	80.7
						3.2239	84.83
						3.2239	87.09
						3.2239	86
						3.2406	85.06
						3.2406	87.3
						3.2406	87.61
						3.2572	84.79
						3.2572	88.02
						3.2572	87.94
						3.2739	84.53
						3.2739	88.58
						3.2739	88.48
						3.2906	84.46
						3.2906	89.31
						3.2906	88.44
						3.3072	76.86
						3.3072	82.8
						3.3072	86.82
						3.3239	59.77
						3.3239	58.75
						3.3239	63.92
						3.3406	82.15
						3.3406	82.81
						3.3406	83.27
						3.3572	83.94
						3.3572	87.15
						3.3572	86.13
						3.3739	84.51
						3.3739	88.18
						3.3739	86.88
						3.3906	83.98
						3.3906	88.52
						3.3906	87.84
						3.4072	85.59
						3.4072	88.59
						3.4072	88.38
						3.4239	70.48
						3.4239	71.96
						3.4239	78.27
						3.4406	69.81
						3.4406	68.06
						3.4406	69.02
						3.4572	79.96
						3.4572	84.45
						3.4572	83.44
						3.4739	82.7
						3.4739	86.74
						3.4739	86.24
						3.4906	84.14
						3.4906	87.71
						3.4906	86.96
						3.5072	84.65
						3.5072	88.5
						3.5072	87.87
						3.5239	80.77
						3.5239	86.11
						3.5239	88.48
						3.5406	56.85
						3.5406	52.17
						3.5406	63.59
						3.5572	54.17
						3.5572	52.58
						3.5572	59.55
						3.5739	76.41
						3.5739	78.24
						3.5739	76.21
						3.5906	79.09
						3.5906	81.16
						3.5906	81.42
						3.6072	78.79
						3.6072	82.88
						3.6072	81.9
						3.6239	82.14
						3.6239	86.88
						3.6239	85.21
						3.6406	68.81
						3.6406	73.22
						3.6406	76.46
						3.6572	54.41
						3.6572	49.63
						3.6572	60.74
						3.6739	51.91
						3.6739	53.25
						3.6739	56.88
						3.6906	73.85
						3.6906	75.91
						3.6906	74.33
						3.7072	79.24
						3.7072	80.44
						3.7072	80.94
						3.7239	77.77
						3.7239	81.79
						3.7239	80.25
						3.7406	70.2
						3.7406	75.46
						3.7406	76.72
						3.7572	53.88
						3.7572	49.01
						3.7572	58.03
						3.7739	49.43
						3.7739	48.86
						3.7739	54.88
						3.7906	75.52
						3.7906	74.27
						3.7906	75.46
						3.8072	79.59
						3.8072	79.92
						3.8072	81.58
						3.8239	78.18
						3.8239	79.47
						3.8239	81.73
						3.8406	82.54
						3.8406	84.5
						3.8406	84.15
						3.8572	55.58
						3.8572	50.98
						3.8572	61.33
						3.8739	49.7
						3.8739	44.15
						3.8739	55.17
						3.8906	68.77
						3.8906	67.57
						3.8906	65.18
						3.9072	77.44
						3.9072	78.09
						3.9072	78.71
						3.9239	77.7
						3.9239	78.57
						3.9239	79.69
						3.9406	80.44
						3.9406	82.55
						3.9406	80.9
						3.9572	74.71
						3.9572	80.14
						3.9572	83.42
						3.9739	52.74
						3.9739	48.96
						3.9739	58.35
						3.9906	47.67
						3.9906	42.09
						3.9906	53.54
						4.0072	68.07
						4.0072	71.21
						4.0072	70.37
						4.0239	76.83
						4.0239	79
						4.0239	79.94
						4.0406	76.39
						4.0406	78.57
						4.0406	79.89
						4.0572	81.08
						4.0572	83.19
						4.0572	82.16
						4.0739	83.18
						4.0739	84.79
						4.0739	83.75
						4.0906	69.43
						4.0906	73.04
						4.0906	77.26
						4.1072	50.25
						4.1072	45.1
						4.1072	56.05
						4.1239	46.39
						4.1239	39.22
						4.1239	53.5
						4.1406	69.52
						4.1406	70.31
						4.1406	64.55
						4.1572	77.27
						4.1572	77.12
						4.1572	78.78
						4.1739	76.3
						4.1739	78.98
						4.1739	78.33
						4.1906	81.44
						4.1906	82.49
						4.1906	79.8
						4.2072	55.56
						4.2072	55.58
						4.2072	67.42
						4.2239	46.71
						4.2239	40.92
						4.2239	55.17
						4.2406	57.57
						4.2406	50.57
						4.2406	54.22
						4.2572	76.01
						4.2572	73.08
						4.2572	68.53
						4.2739	75.97
						4.2739	76.34
						4.2739	75.61
						4.2906	80.29
						4.2906	79.78
						4.2906	75.48
						4.3072	83.13
						4.3072	82.51
						4.3072	81.59
						4.3239	83.4
						4.3239	84.47
						4.3239	82.98
						4.3406	50.91
						4.3406	49.59
						4.3406	59.04
						4.3572	67.42
						4.3572	55.37
						4.3572	56
						4.3739	78.29
						4.3739	75.55
						4.3739	75.66
						4.3906	81.19
						4.3906	82.11
						4.3906	78.44
						4.4072	81.85
						4.4072	83.14
						4.4072	81.97
						4.4239	83.25
						4.4239	84.54
						4.4239	83.53
						4.4406	84.38
						4.4406	85.2
						4.4406	84.86
						4.4572	50.32
						4.4572	49.16
						4.4572	57.95
						4.5056	56.66
						4.5056	42.3
						4.5056	52.23
						4.5136	81.07
						4.5136	80.13
						4.5136	78.77
						4.5303	82.77
						4.5303	82.77
						4.5303	82.76
						4.5469	83.1
						4.5469	84.2
						4.5469	84.14
						4.5636	84.57
						4.5636	84.16
						4.5636	85.6
						4.5803	61.06
						4.5803	63.82
						4.5803	70.21
						4.5969	46.04
						4.5969	41.93
						4.5969	52.88
						4.6136	70.3
						4.6136	68.67
						4.6136	69.1
						4.6303	79.03
						4.6303	76.91
						4.6303	77.96
						4.6469	82.45
						4.6469	82.58
						4.6469	81.9
						4.6636	83.22
						4.6636	84.08
						4.6636	83.41
						4.6803	84.32
						4.6803	85.13
						4.6803	84.97
						4.6969	85.15
						4.6969	86.35
						4.6969	85.89
						4.7136	85.71
						4.7136	86.97
						4.7136	86.1
						4.7303	55.82
						4.7303	56.34
						4.7303	64.67
						4.7469	45.34
						4.7469	39.92
						4.7469	53.53
						4.7636	67.81
						4.7636	64.73
						4.7636	56.58
						4.7803	75.29
						4.7803	74.54
						4.7803	74.42
						4.7969	81.66
						4.7969	81.72
						4.7969	75.53
						4.8136	82.49
						4.8136	82.87
						4.8136	81.97
						4.8303	72.26
						4.8303	76.36
						4.8303	80.96
						4.8469	44.93
						4.8469	40.94
						4.8469	53.59
						4.8636	55.09
						4.8636	50.45
						4.8636	49.72
						4.8803	73.68
						4.8803	71.71
						4.8803	73.32
						4.8969	80.04
						4.8969	78.91
						4.8969	77.59
						4.9136	81.11
						4.9136	81.06
						4.9136	82.98
						4.9303	72.66
						4.9303	76.86
						4.9303	84.26
						4.9469	44.07
						4.9469	36.7
						4.9469	54.38
						4.9636	38.62
						4.9636	30.25
						4.9636	49.7
						4.9803	65.41
						4.9803	61.63
						4.9803	69.81
						4.9969	69.81
						4.9969	69.04
						4.9969	75.58
						5.0136	76.98
						5.0136	76.75
						5.0136	80.21
						5.0303	79.49
						5.0303	80.17
						5.0303	83.84
						5.0469	58.2
						5.0469	60.48
						5.0469	70.83
						5.0636	41.22
						5.0636	35.46
						5.0636	51.46
						5.0803	38.05
						5.0803	30.39
						5.0803	46.61
						5.0969	63.57
						5.0969	64.07
						5.0969	70.57
						5.1136	66.94
						5.1136	69.63
						5.1136	74.01
						5.1303	74.77
						5.1303	76.16
						5.1303	79.26
						5.1469	66.86
						5.1469	71.71
						5.1469	78.91
						5.1636	41.34
						5.1636	37
						5.1636	50.42
						5.1803	36.82
						5.1803	30.61
						5.1803	47.62
						5.1969	62.69
						5.1969	66.67
						5.1969	69.55
						5.2136	69.01
						5.2136	70.71
						5.2136	73.85
						5.2303	75.77
						5.2303	77.6
						5.2303	77.45
						5.2469	79.38
						5.2469	80.51
						5.2469	79.31
						5.2636	44.4
						5.2636	44.85
						5.2636	46.69
						5.2803	37.17
						5.2803	33.04
						5.2803	39.45
						5.2969	52.36
						5.2969	48.84
						5.2969	46
						5.3136	62.24
						5.3136	68.85
						5.3136	68.29
						5.3303	65.65
						5.3303	69.93
						5.3303	70
						5.3469	74.23
						5.3469	78.6
						5.3469	78.27
						5.3636	62.53
						5.3636	73.37
						5.3636	79.9
						5.3803	26.53
						5.3803	33.44
						5.3803	41.69
						5.3969	16.75
						5.3969	24.68
						5.3969	33.39
						5.4136	11.72
						5.4136	45.14
						5.4136	39.25
						5.4303	29.11
						5.4303	65.62
						5.4303	64.64
						5.4469	51.09
						5.4469	65.81
						5.4469	66.04
						5.4636	46.35
						5.4636	75.39
						5.4636	75.34
						5.4803	10.66
						5.4803	32.35
						5.4803	38.98
						5.4969	8.63
						5.4969	24.04
						5.4969	31.01
						5.5136	6.21
						5.5136	24.53
						5.5136	28.08
						5.5303	45.62
						5.5303	63.29
						5.5303	62.22
						5.5469	55.25
						5.5469	66.05
						5.5469	67.17
						5.5636	51
						5.5636	72.38
						5.5636	73.22
						5.5803	16.63
						5.5803	33.91
						5.5803	38.84
						5.5969	8.61
						5.5969	23.19
						5.5969	29.33
						5.6136	14.97
						5.6136	24.92
						5.6136	23.54
						5.6303	51.88
						5.6303	61.83
						5.6303	57.82
						5.6469	49.83
						5.6469	63.97
						5.6469	63.87
						5.6636	60.22
						5.6636	72.56
						5.6636	70.97
						5.6803	67.95
						5.6803	76.89
						5.6803	75.85
						5.6969	15.29
						5.6969	34.83
						5.6969	39.54
						5.7136	7.85
						5.7136	20.05
						5.7136	25.88
						5.7303	14.08
						5.7303	16.18
						5.7303	22.26
						5.7469	51.9
						5.7469	52.92
						5.7469	51.07
						5.7636	49.27
						5.7636	61.4
						5.7636	62.92
						5.7803	54.72
						5.7803	64.65
						5.7803	65.18
						5.7969	31.82
						5.7969	51.52
						5.7969	57.09
						5.8136	6.82
						5.8136	19.82
						5.8136	25.8
						5.8303	4.95
						5.8303	17.38
						5.8303	22.34
						5.8469	31.5
						5.8469	13.58
						5.8469	23.4
						5.8636	50.89
						5.8636	58.26
						5.8636	60.45
						5.8803	50.01
						5.8803	62.33
						5.8803	61.97
						5.8969	27.12
						5.8969	51.5
						5.8969	58.12
						5.9136	7.12
						5.9136	20.49
						5.9136	24.6
						5.9303	4.7
						5.9303	16.69
						5.9303	19.79
						5.9469	26.92
						5.9469	33.11
						5.9469	32.56
						5.9636	46.07
						5.9636	58.71
						5.9636	58.64
						5.9803	44.8
						5.9803	61.05
						5.9803	60.64
						5.9969	50.97
						5.9969	72.44
						5.9969	72.45
						6.0136	16.44
						6.0136	39.81
						6.0136	43.96
						6.0303	7.01
						6.0303	20.43
						6.0303	22.56
						6.0469	4.68
						6.0469	16.33
						6.0469	19.92
						6.0636	18.71
						6.0636	21
						6.0636	22.49
						6.0803	42.53
						6.0803	59.93
						6.0803	59.52
						6.0969	44.9
						6.0969	60.56
						6.0969	59.9
						6.1136	20.57
						6.1136	51.08
						6.1136	57.29
						6.1303	6.23
						6.1303	16.74
						6.1303	21.1
						6.1469	4.03
						6.1469	13.37
						6.1469	21.46
						6.1636	8.96
						6.1636	10.74
						6.1636	16.27
						6.1803	40.91
						6.1803	50.53
						6.1803	43.94
						6.1969	47.15
						6.1969	59.36
						6.1969	60.73
						6.2136	31.14
						6.2136	52.11
						6.2136	63.92
						6.2303	6.51
						6.2303	16.6
						6.2303	32.13
						6.2469	5.08
						6.2469	13.38
						6.2469	23.24
						6.2636	9.42
						6.2636	9.7
						6.2636	16.18
						6.2803	41.39
						6.2803	47.25
						6.2803	36.86
						6.2969	44.48
						6.2969	56.84
						6.2969	56.9
						6.3136	53.53
						6.3136	64.37
						6.3136	65.99
						6.3303	18.74
						6.3303	41.43
						6.3303	50.02
						6.3469	6.6
						6.3469	14.23
						6.3469	21.04
						6.3636	5.29
						6.3636	10.11
						6.3636	16.47
						6.3803	5.48
						6.3803	6.14
						6.3803	13.03
						6.3969	33.69
						6.3969	46.11
						6.3969	46.7
						6.4136	46.39
						6.4136	56.85
						6.4136	57.29
						6.4303	52.23
						6.4303	65.43
						6.4303	66.21
						6.4469	7.56
						6.4469	16.29
						6.4469	20.62
						6.4636	5.43
						6.4636	10.81
						6.4636	15.5
						6.4803	4.23
						6.4803	9.73
						6.4803	9
						6.4969	11.08
						6.4969	16.06
						6.4969	41.58
						6.5136	37.5
						6.5136	49.49
						6.5136	55.12
						6.5303	46.51
						6.5303	54.73
						6.5303	67.26
						6.5469	19.45
						6.5469	39.19
						6.5469	47.25
						6.5636	6.27
						6.5636	8.9
						6.5636	17.16
						6.5803	5.26
						6.5803	7.05
						6.5803	15.56
						6.5969	11.88
						6.5969	4.17
						6.5969	14.43
						6.6136	40.21
						6.6136	43.28
						6.6136	37.48
						6.6303	44.51
						6.6303	50.98
						6.6303	51.92
						6.6469	61.45
						6.6469	61.97
						6.6469	63.62
						6.6636	14.93
						6.6636	28.39
						6.6636	33.28
						6.6803	5.86
						6.6803	8.19
						6.6803	14.45
						6.6969	4.48
						6.6969	5.53
						6.6969	12.79
						6.7136	29.67
						6.7136	9.99
						6.7136	19.04
						6.7303	47.37
						6.7303	48.98
						6.7303	53.22
						6.7469	47.85
						6.7469	52.59
						6.7469	58.47
						6.7636	26.28
						6.7636	42.25
						6.7636	52.2
						6.7803	5.43
						6.7803	7.57
						6.7803	16.19
						6.7969	3.7
						6.7969	5.11
						6.7969	12.2
						6.8136	13.2
						6.8136	3.46
						6.8136	11.57
						6.8303	40.57
						6.8303	27.1
						6.8303	44.4
						6.8469	44.93
						6.8469	48.12
						6.8469	51.82
						6.8636	58.4
						6.8636	58.38
						6.8636	64.2
						6.8803	66.07
						6.8803	67.99
						6.8803	68.64
						6.8969	11.21
						6.8969	25.15
						6.8969	30.16
						6.9136	4.02
						6.9136	5.55
						6.9136	12.15
						6.9303	2.08
						6.9303	4.32
						6.9303	9.4
						6.9469	34.46
						6.9469	20.52
						6.9469	23.7
						6.9636	49.2
						6.9636	49.45
						6.9636	50.78
						6.9803	48.76
						6.9803	50.91
						6.9803	54.43
						6.9969	57.09
						6.9969	66.17
						6.9969	69.23
						7.0136	5.3
						7.0136	12.99
						7.0136	22.27
						7.0303	2.63
						7.0303	5.07
						7.0303	11.17
						7.0469	7.9
						7.0469	2.74
						7.0469	8.3
						7.0636	46.21
						7.0636	35.97
						7.0636	43.19
						7.0803	49.94
						7.0803	51.08
						7.0803	53.42
						7.0969	50.55
						7.0969	50.52
						7.0969	63.81
						7.1136	9.4
						7.1136	20.74
						7.1136	30.62
						7.1303	2.37
						7.1303	4.76
						7.1303	10.38
						7.1469	1.25
						7.1469	2.71
						7.1469	8.83
						7.1636	27.31
						7.1636	20.08
						7.1636	18.42
						7.1803	48.53
						7.1803	47.33
						7.1803	47.82
						7.1969	50.14
						7.1969	49.04
						7.1969	50.85
						7.2136	10.44
						7.2136	24.37
						7.2136	32.66
						7.2303	2.26
						7.2303	3.49
						7.2303	9.84
						7.2469	1.19
						7.2469	2.75
						7.2469	9.4
						7.2636	33.6
						7.2636	11.44
						7.2636	20.34
						7.2803	48.01
						7.2803	46.56
						7.2803	48.56
						7.2969	50.72
						7.2969	50.2
						7.2969	54.31
						7.3136	51.4
						7.3136	62.17
						7.3136	67.54
						7.3303	7.89
						7.3303	17.74
						7.3303	28.14
						7.3469	1.94
						7.3469	3.26
						7.3469	8.14
						7.3636	1.14
						7.3636	1.92
						7.3636	6.63
						7.3803	38.42
						7.3803	25.65
						7.3803	37.7
						7.3969	51.86
						7.3969	49.71
						7.3969	52.45
						7.4136	51.73
						7.4136	50.21
						7.4136	56.47
						7.4303	13.48
						7.4303	31.47
						7.4303	43.09
						7.4469	2.19
						7.4469	2.95
						7.4469	8.93
						7.4636	1.18
						7.4636	1.82
						7.4636	6.9
						7.4803	11.86
						7.4803	12.1
						7.4803	26.23
						7.4969	43.11
						7.4969	44.99
						7.4969	50.59
						7.5136	51.87
						7.5136	47.39
						7.5136	52.61
						7.5303	28.71
						7.5303	48.07
						7.5303	61.19
						7.5469	2.35
						7.5469	3.51
						7.5469	10.1
						7.5636	1.15
						7.5636	1.64
						7.5636	5.82
						7.5803	19.66
						7.5803	5.99
						7.5803	13.67
						7.5969	46.54
						7.5969	42.75
						7.5969	47.67
						7.6136	51.9
						7.6136	47.68
						7.6136	49.54
						7.6303	53.92
						7.6303	56.63
						7.6303	65.22
						7.6469	15.81
						7.6469	33.07
						7.6469	43.05
						7.6636	2.24
						7.6636	2.82
						7.6636	5.33
						7.6803	1.21
						7.6803	1.36
						7.6803	4.95
						7.6969	26.72
						7.6969	14.05
						7.6969	22.16
						7.7136	49.53
						7.7136	41.5
						7.7136	49.03
						7.7303	54.13
						7.7303	47.38
						7.7303	49.01
						7.7469	45.16
						7.7469	56.2
						7.7469	65.04
						7.7636	2.93
						7.7636	3.21
						7.7636	8.92
						7.7803	1.37
						7.7803	1.41
						7.7803	5.11
						7.7969	11.22
						7.7969	0.84
						7.7969	13.44
						7.8136	43.85
						7.8136	30.51
						7.8136	47.89
						7.8303	51.85
						7.8303	45.19
						7.8303	47.48
						7.8469	53.95
						7.8469	46.58
						7.8469	64.54
						7.8636	55.08
						7.8636	64.81
						7.8636	70.52
						7.8803	54.18
						7.8803	69.67
						7.8803	73.47
						7.8969	3.35
						7.8969	4.94
						7.8969	10.21
						7.9136	1.57
						7.9136	1.86
						7.9136	5.04
						7.9303	10.56
						7.9303	2.82
						7.9303	9.49
						7.9469	44.8
						7.9469	38.37
						7.9469	46.08
						7.9636	51.14
						7.9636	45.18
						7.9636	46.09
						7.9803	53.68
						7.9803	56.21
						7.9803	62.87
						7.9969	32.19
						7.9969	47.55
						7.9969	59.4
						8.0136	2.64
						8.0136	3.08
						8.0136	7.06
						8.0303	1.37
						8.0303	1.39
						8.0303	5.18
						8.0469	15.13
						8.0469	13.61
						8.0469	22.09
						8.0636	45.88
						8.0636	43.99
						8.0636	47.07
						8.0803	51.47
						8.0803	46.3
						8.0803	51.75
						8.0969	53.27
						8.0969	60.25
						8.0969	64.87
						8.1136	3.5
						8.1136	4.46
						8.1136	9.95
						8.1303	1.48
						8.1303	1.57
						8.1303	3.44
						8.1469	9.98
						8.1469	2.49
						8.1469	2.29
						8.1636	43.26
						8.1636	35.58
						8.1636	38.31
						8.1803	49.69
						8.1803	43.16
						8.1803	44.27
						8.1969	50.27
						8.1969	56.22
						8.1969	59.1
						8.2136	3.67
						8.2136	5.19
						8.2136	10.46
						8.2303	1.44
						8.2303	1.56
						8.2303	3.23
						8.2469	3.34
						8.2469	0.87
						8.2469	4.68
						8.2636	37.55
						8.2636	28.2
						8.2636	39.32
						8.2803	48.44
						8.2803	43.09
						8.2803	50.03
						8.2969	52.34
						8.2969	50.3
						8.2969	62.56
						8.3136	52.48
						8.3136	63.63
						8.3136	67.34
						8.3303	3.31
						8.3303	4.31
						8.3303	8.27
						8.3469	1.43
						8.3469	1.61
						8.3469	2.59
						8.3636	8.54
						8.3636	2.76
						8.3636	5.08
						8.3803	40.21
						8.3803	33.69
						8.3803	39.65
						8.3969	48.15
						8.3969	42.81
						8.3969	43.68
						8.4136	49.65
						8.4136	54.09
						8.4136	61.35
						8.4303	4.75
						8.4303	6.29
						8.4303	15.02
						8.4469	1.59
						8.4469	1.69
						8.4469	2.98
						8.4636	0.89
						8.4636	0.88
						8.4636	1.68
						8.4803	22.05
						8.4803	9.36
						8.4803	28.16
						8.4969	44.66
						8.4969	37.38
						8.4969	41.66
						8.5136	49.49
						8.5136	42.12
						8.5136	59.73
						8.5303	18.53
						8.5303	34.76
						8.5303	45.86
						8.5469	2.01
						8.5469	2.08
						8.5469	3.59
						8.5636	1.01
						8.5636	0.97
						8.5636	1.78
						8.5803	25
						8.5803	0.62
						8.5803	13.63
						8.7142	0.28
						8.7142	25.48
						8.7142	30.17
						8.7169	0.28
						8.7169	25.16
						8.7169	29.3
						8.7208	0.44
						8.7208	5.61
						8.7208	7.03
						8.7383	52.18
						8.7383	67.34
						8.7383	68.67
						8.7561	53.09
						8.7561	73.41
						8.7561	74.48
						8.7728	64.64
						8.7728	76.91
						8.7728	70.12
						8.7894	64.7
						8.7894	78.28
						8.7894	73.35
						8.8061	57.06
						8.8061	81.31
						8.8061	78.66
						8.8228	51.08
						8.8228	82.67
						8.8228	73.31
						8.8394	46.13
						8.8394	83.74
						8.8394	68.04
						8.8561	63.84
						8.8561	76.76
						8.8561	68.22
						8.8728	59.18
						8.8728	83.72
						8.8728	65.31
						8.8894	48.4
						8.8894	84.5
						8.8894	58.72
						8.9061	55.2
						8.9061	85.44
						8.9061	81.37
						8.9228	65.37
						8.9228	85.68
						8.9228	83.46
						8.9394	61.28
						8.9394	85.32
						8.9394	84.72
						8.9561	73.01
						8.9561	86.11
						8.9561	85.44
						8.9728	66.61
						8.9728	80.81
						8.9728	85.95
						8.9894	69.64
						8.9894	76.84
						8.9894	86.21
						9.0061	69.81
						9.0061	75.93
						9.0061	86.34
						9.0228	77.6
						9.0228	83.29
						9.0228	86.78
						9.0394	74.02
						9.0394	85.54
						9.0394	85.44
						9.0561	73.77
						9.0561	87.28
						9.0561	85.17
						9.0728	81.11
						9.0728	87.72
						9.0728	86.38
						9.0894	77.91
						9.0894	87.95
						9.0894	87.08
						9.1061	74.12
						9.1061	88.34
						9.1061	87.68
						9.1228	75.31
						9.1228	88.84
						9.1228	87.85
						9.1394	83.5
						9.1394	88.96
						9.1394	88.18
						9.1561	84.5
						9.1561	88.95
						9.1561	88.37
						9.1728	83.93
						9.1728	89.15
						9.1728	88.54
						9.1894	85.63
						9.1894	89.24
						9.1894	88.55
						9.2061	82.93
						9.2061	89.62
						9.2061	88.62
						9.2228	85.85
						9.2228	89.18
						9.2228	88.86
						9.2394	86.87
						9.2394	88.73
						9.2394	88.91
						9.2561	86.82
						9.2561	89.37
						9.2561	88.91
						9.2728	87.1
						9.2728	89.35
						9.2728	89.08
						9.2894	87.59
						9.2894	89.59
						9.2894	88.72
						9.3061	88.25
						9.3061	90.03
						9.3061	88.87
						9.3228	88.52
						9.3228	90.71
						9.3228	89.21
						9.3394	88.74
						9.3394	90.32
						9.3394	89.5
						9.3561	88.87
						9.3561	89.56
						9.3561	89.6
						9.3728	89.23
						9.3728	89.73
						9.3728	89.66
						9.3894	89.16
						9.3894	90.16
						9.3894	89.41
						9.4061	89.3
						9.4061	90.17
						9.4061	89.47
						9.4228	89.29
						9.4228	89.84
						9.4228	89.93
						9.4394	89.56
						9.4394	90.34
						9.4394	89.92
						9.4561	89.61
						9.4561	90.58
						9.4561	89.82
						9.4728	89.73
						9.4728	90.41
						9.4728	90.13
						9.4894	89.67
						9.4894	90.6
						9.4894	90.01
						9.5061	89.79
						9.5061	90.73
						9.5061	90.16
						9.5228	89.98
						9.5228	90.61
						9.5228	90.12
						9.5394	77.27
						9.5394	87.23
						9.5394	89.8
						9.5561	14.12
						9.5561	7.59
						9.5561	21.74
						9.5728	4.1
						9.5728	3.6
						9.5728	8.17
						9.5894	48.43
						9.5894	2.54
						9.5894	9.24
						9.6061	59.71
						9.6061	38.57
						9.6061	54.18
						9.6228	62.55
						9.6228	45.23
						9.6228	71.55
						9.6394	73.82
						9.6394	64.72
						9.6394	76.34
						9.6561	50.58
						9.6561	49.52
						9.6561	64.4
						9.6728	4.9
						9.6728	3.78
						9.6728	10.3
						9.6894	2.68
						9.6894	2.21
						9.6894	4.24
						9.7061	43.54
						9.7061	2.1
						9.7061	21.6
						9.7228	53.18
						9.7228	36.55
						9.7228	51.73
						9.7394	54.92
						9.7394	44.38
						9.7394	69.21
						9.7561	69.73
						9.7561	60.24
						9.7561	74.14
						9.7728	46.35
						9.7728	47.06
						9.7728	63.66
						9.7894	4.2
						9.7894	3.29
						9.7894	7.13
						9.8061	2.29
						9.8061	1.8
						9.8061	2.88
						9.8228	34.5
						9.8228	1.24
						9.8228	13.47
						9.8394	50.13
						9.8394	21.95
						9.8394	47.44
						9.8561	49.04
						9.8561	41.46
						9.8561	65.82
						9.8728	54.64
						9.8728	58.15
						9.8728	71.69
						9.8894	29.01
						9.8894	33.22
						9.8894	48.08
						9.9061	3.12
						9.9061	2.6
						9.9061	5.11
						9.9228	1.85
						9.9228	1.44
						9.9228	2.3
						9.9394	32.76
						9.9394	1.03
						9.9394	16.36
						9.9561	46.54
						9.9561	22.34
						9.9561	44.32
						9.9728	47.98
						9.9728	39.88
						9.9728	64.69
						9.9894	48.93
						9.9894	58.63
						9.9894	70.44
						10.0061	10.53
						10.0061	15.78
						10.0061	30.68
						10.0228	2.38
						10.0228	2.09
						10.0228	3.74
						10.0394	1.45
						10.0394	1.24
						10.0394	1.89
						10.0561	34.63
						10.0561	1.06
						10.0561	11.03
						10.0728	40.22
						10.0728	19.75
						10.0728	40
						10.0894	44.47
						10.0894	37.61
						10.0894	61.87
						10.1061	46.14
						10.1061	58.66
						10.1061	67.18
						10.1228	5.77
						10.1228	5.63
						10.1228	20.22
						10.1394	1.96
						10.1394	1.68
						10.1394	2.97
						10.1561	1.2
						10.1561	1.01
						10.1561	1.61
						10.1728	36.75
						10.1728	0.86
						10.1728	1.14
						10.1894	40.2
						10.1894	30.23
						10.1894	0.82
						10.2061	43.32
						10.2061	44.56
						10.2061	9.92
						10.2228	47.58
						10.2228	59.37
						10.2228	28.2
						10.2397	8.34
						10.2397	27.69
						10.2397	48.81
						10.2561	2.15
						10.2561	2.32
						10.2561	3.54
						10.2728	1.23
						10.2728	1.24
						10.2728	1.3
						10.2894	33.48
						10.2894	0.92
						10.2894	0.85
						10.3061	43.24
						10.3061	19.4
						10.3061	0.59
						10.3228	43.13
						10.3228	33.91
						10.3228	0.43
						10.3394	46.79
						10.3394	56.97
						10.3394	0.3
						10.3561	58
						10.3561	63.33
						10.3561	46.63
						10.3728	3.28
						10.3728	3.26
						10.3728	2.16
						10.3894	1.61
						10.3894	1.45
						10.3894	0.69
						10.4061	1.64
						10.4061	0.85
						10.4061	0.44
						10.4228	35.48
						10.4228	6.29
						10.4228	0.3
						10.4394	40.27
						10.4394	33.68
						10.4394	0.2
						10.4561	41.64
						10.4561	54.45
						10.4561	0.12
						10.4728	26.73
						10.4728	47.78
						10.4728	0.03
						10.4894	2.15
						10.4894	2.42
						10.4894	0.05
						10.5061	1.16
						10.5061	1.2
						10.5061	0.02
						10.5228	20.55
						10.5228	0.73
						10.5228	0.03
						10.5394	38.44
						10.5394	8.94
						10.5394	0
						10.5561	39.82
						10.5561	11.48
						10.5561	0
						10.5728	28.2
						10.5728	51.78
						10.5728	0
						10.5894	4.95
						10.5894	31.2
						10.5894	0
						10.6061	1.47
						10.6061	1.93
						10.6061	0
						10.6228	0.85
						10.6228	0.92
						10.6228	0
						10.6394	0.57
						10.6394	0.6
						10.6394	0
						10.6561	3.96
						10.6561	0.4
						10.6561	0
						10.6728	8.49
						10.6728	0.3
						10.6728	0
						10.6894	15.34
						10.6894	17.16
						10.6894	0
						10.7061	1.44
						10.7061	10.38
						10.7061	0
						10.7228	0.4
						10.7228	0.81
						10.7228	0
						10.7394	0.21
						10.7394	0.42
						10.7394	0
						10.7561	0.15
						10.7561	0.23
						10.7561	0
						10.7728	3.19
						10.7728	0.16
						10.7728	0
						10.7894	32.05
						10.7894	5.09
						10.7894	0
						10.8061	20.98
						10.8061	11.87
						10.8061	0
						10.8228	2.81
						10.8228	5.67
						10.8228	0
						10.8394	0.78
						10.8394	0.69
						10.8394	0
						10.8561	0.38
						10.8561	0.3
						10.8561	0
						10.8728	0.18
						10.8728	0.2
						10.8728	0.77
						10.8894	0.08
						10.8894	11.72
						10.8894	0.02
						10.9061	0
						10.9061	44.83
						10.9061	1.67
						10.9228	12.72
						10.9228	51.57
						10.9228	0.47
						10.9394	1.14
						10.9394	5.26
						10.9394	0.04
						10.9561	0.18
						10.9561	1.25
						10.9561	0.03
						10.9728	0.01
						10.9728	0.66
						10.9728	0.01
						10.9894	0
						10.9894	0.42
						10.9894	0
						11.0061	0
						11.0061	0.28
						11.0061	0
						11.0228	6.56
						11.0228	28.92
						11.0228	0
						11.0394	26.57
						11.0394	49.07
						11.0394	0
						11.0561	1.06
						11.0561	3.48
						11.0561	0
						11.0728	0.23
						11.0728	0.96
						11.0728	0
						11.0894	0
						11.0894	0.52
						11.0894	0
						11.1061	0
						11.1061	0.36
						11.1061	0
						11.1228	0
						11.1228	0.19
						11.1228	3.37
						11.1394	0
						11.1394	16.31
[truncated: 370 more rows]
