# Supplementary material for: Automated Conditional Screening of Escherichia Coli Knockout Mutants in Parallel Adaptive Fed-Batch Cultivations
Source: Preprints.org preprint supplement (doi:10.20944/preprints202009.0381.v1), 2020-09-17
Supplement: Supplementary file 3 [file Table_S2_ParameterSets.xlsx]

## Sheet: InitValues and Bounds
Parameter	Lower Bound	inital Value	Upper Bound
Kap	1	4.4447	10
Kaq	0.3	0.4	1
kLa	200	280	300
Ko	1	10	20
Ks	0.03	0.05	0.1
Ksq	0.1	1.0667	2
pAmax	0.5	1.3091	1.6
qAmax	0.5	1.0252	1.6
qm	0.02	0.04	0.045
qSmax	1	1.56	1.6
Yam	0.4	0.4	1
Yaof	0.2	0.4607	0.6
Yaresp	0.05	0.1	0.15
Yem	0.5	0.56	0.6
Yofm	0.2	0.2795	0.8
Yosresp	0.7	1	2

## Sheet: E. coli W3110
Escherichia coli W3110
	MC 1		MC 2		MC 3		MC 4		MC 5		MC 6		MC 7		MC 8		MC 9
Parameter	SSS	Par	SSS	Par	SSS	Par	SSS	Par	SSS	Par	SSS	Par	SSS	Par	SSS	Par	SSS	Par
Kap		4.4447		4.4447		4.4447		4.4447		4.4447		4.4447		4.4447		4.4447		4.4447
Kaq	*	0.99185	*	0.90033	*	0.4553	*	0.41357	*	0.31878	*	0.3235	*	0.45364	*	0.44451	*	0.58589
Ko		10		10		10		10		10	*	2.671	*	16.173	*	16.469	*	19.872
Ks	*	0.084169	*	0.084591	*	0.03172	*	0.031402	*	0.030975	*	0.030812	*	0.031385	*	0.0484	*	0.032993
Ksq	*	1.2505		1.0667	*	1.8195	*	1.7059	*	1.1015	*	1.4774	*	1.6031	*	1.3285	*	1.5186
Yam	*	0.40723	*	0.45625		0.5	*	0.40375	*	0.40325	*	0.42071	*	0.40723	*	0.42266	*	0.40088
Yaof	*	0.37976	*	0.28031	*	0.31979	*	0.33386	*	0.30141	*	0.30999	*	0.33358	*	0.32777	*	0.35093
Yaresp	*	0.061089	*	0.074044	*	0.09076	*	0.080783	*	0.081747	*	0.14902	*	0.1496	*	0.14525	*	0.14986
Yem	*	0.56119	*	0.5217	*	0.55083	*	0.595	*	0.59672	*	0.5995	*	0.59949	*	0.59177	*	0.59968
Yofm		0.2795	*	0.22731	*	0.20196	*	0.20209	*	0.20182	*	0.21419	*	0.20459	*	0.21262	*	0.20054
Yosresp	*	0.72931	*	1.0782	*	1.4443	*	1.5869	*	1.8578	*	1.9972	*	1.998	*	1.9772	*	1.9993
kLa		280		280		280		280		280		280		280		280		280
pAmax	*	0.87789	*	1.1209	*	1.5849	*	1.5929	*	1.4756	*	1.5912	*	1.5962	*	1.4977	*	1.5975
qAmax	*	0.51491	*	0.69981	*	1.5301	*	1.554	*	1.5239	*	1.3994	*	1.5497	*	1.4537	*	1.5908
qSmax	*	1.274	*	1.41	*	1.5929	*	1.5985	*	1.5971	*	1.5811	*	1.5965	*	1.5662	*	1.5969
qm		0.04		0.04		0.04		0.04		0.04		0.04		0.04		0.04		0.04
* adajusted parameter

## Sheet: E. coli BW25113
Escherichia coli BW25113
	MC 1		MC 2		MC 3		MC 4		MC 5		MC 6		MC 7		MC 8		MC 9
Parameter	SSS	Par	SSS	Par	SSS	Par	SSS	Par	SSS	Par	SSS	Par	SSS	Par	SSS	Par	SSS	Par
Kap		4.4447		4.4447		4.4447		4.4447		4.4447		4.4447		4.4447		4.4447		4.4447
Kaq	*	0.94748	*	0.98352	*	0.87736	*	0.87581	*	0.9265	*	0.93382	*	0.86331	*	0.8087	*	0.54534
Ko		10		10		10		10		10		10	*	17.127	*	18.26	*	18.134
Ks	*	0.063719	*	0.082176	*	0.032427	*	0.031445	*	0.043369	*	0.040238	*	0.04057	*	0.032182	*	0.03053
Ksq		1.0667	*	0.21382	*	1.9699	*	1.9692	*	1.9017	*	1.9078	*	1.8156	*	1.9454	*	1.9835
Yam	*	0.50755	*	0.41644	*	0.41179	*	0.42384	*	0.44372	*	0.47213	*	0.47753	*	0.44556	*	0.41422
Yaof	*	0.31799	*	0.3837	*	0.20302	*	0.20288	*	0.21018	*	0.21119	*	0.21703	*	0.2036	*	0.20121
Yaresp	*	0.060759	*	0.05692	*	0.13126	*	0.13478	*	0.11318	*	0.12075	*	0.13038	*	0.14617	*	0.14936
Yem	*	0.52199	*	0.50434	*	0.55225	*	0.57973	*	0.56097	*	0.57876	*	0.58587	*	0.59748	*	0.59951
Yofm		0.2795		0.2795	*	0.20327	*	0.20274	*	0.21303	*	0.22	*	0.22632	*	0.21204	*	0.20441
Yosresp		1		1	*	1.3013	*	1.19	*	1.0417	*	1.1424	*	1.6386	*	1.8562	*	1.9955
kLa		280		280		280		280		280		280		280		280		280
pAmax	*	1.3172	*	1.5699	*	1.0262	*	0.93666	*	0.89214	*	0.88996	*	0.96789	*	0.91886	*	0.92905
qAmax	*	0.57043	*	0.52503	*	0.81628	*	0.72719	*	0.64698	*	0.66449	*	0.69125	*	0.61846	*	0.52067
qSmax	*	1.2453	*	1.3092	*	1.5934	*	1.5735	*	1.5473	*	1.5328	*	1.54	*	1.5619	*	1.5788
qm		0.04		0.04		0.04		0.04		0.04		0.04		0.04		0.04		0.04
* adajusted parameter

## Sheet: E. coli BW25113 ΔompT
Escherichia coli BW25113 ΔompT
	MC 1		MC 2		MC 3		MC 4		MC 5		MC 6		MC 7		MC 8		MC 9
Parameter	SSS	Par	SSS	Par	SSS	Par	SSS	Par	SSS	Par	SSS	Par	SSS	Par	SSS	Par	SSS	Par
Kap		4.4447		4.4447		4.4447		4.4447		4.4447		4.4447		4.4447		4.4447		4.4447
Kaq	*	0.94303	*	0.94828	*	0.92599	*	0.97952	*	0.96146	*	0.9132	*	0.90871	*	0.96603	*	0.97506
Ko		10		10		10		10		10	*	15.625	*	15.799	*	15.58	*	14.51
Ks	*	0.065333	*	0.078207	*	0.072361	*	0.090284	*	0.035478	*	0.058983	*	0.039855	*	0.033141	*	0.030437
Ksq	*	1.0852	*	0.41242	*	1.7387	*	1.8332	*	1.9018	*	1.4941	*	1.7035	*	1.9177	*	1.9749
Yam	*	0.4527	*	0.43928	*	0.4833	*	0.43502	*	0.44415	*	0.48993	*	0.4651	*	0.45964	*	0.44409
Yaof	*	0.36234	*	0.3373	*	0.23099	*	0.21199	*	0.21081	*	0.23908	*	0.24677	*	0.2195	*	0.23663
Yaresp	*	0.071389	*	0.065522	*	0.12373	*	0.14568	*	0.14227	*	0.12304	*	0.13187	*	0.14618	*	0.14936
Yem	*	0.55004	*	0.51628	*	0.56668	*	0.59543	*	0.5951	*	0.58594	*	0.582	*	0.59709	*	0.59945
Yofm		0.2795		0.2795	*	0.2563	*	0.22562	*	0.22487	*	0.24944	*	0.23047	*	0.22933	*	0.21813
Yosresp	*	0.81553	*	1.0808	*	0.88491	*	0.93917	*	1.1569	*	1.2911	*	1.6073	*	1.8859	*	1.9905
kLa		280		280		280		280		280		280		280		280		280
pAmax	*	1.1178	*	1.3815	*	0.89551	*	0.73073	*	0.86164	*	0.92926	*	1.0921	*	1.0221	*	1.1348
qAmax	*	0.58799	*	0.56633	*	0.64672	*	0.54827	*	0.65279	*	0.71439	*	0.79707	*	0.7521	*	0.89904
qSmax	*	1.2501	*	1.3466	*	1.5548	*	1.5769	*	1.5522	*	1.5554	*	1.5691	*	1.5884	*	1.5983
qm		0.04		0.04		0.04		0.04		0.04		0.04		0.04		0.04		0.04
* adajusted parameter

## Sheet: E. coli BW25113 ΔaceA
Escherichia coli BW25113 ΔaceA
	MC 1		MC 2		MC 3		MC 4		MC 5		MC 6		MC 7		MC 8		MC 9
Parameter	SSS	Par	SSS	Par	SSS	Par	SSS	Par	SSS	Par	SSS	Par	SSS	Par	SSS	Par	SSS	Par
Kap		4.4447		4.4447		4.4447		4.4447		4.4447		4.4447		4.4447		4.4447		4.4447
Kaq	*	0.99564	*	0.99331	*	0.94172	*	0.84599	*	0.94485	*	0.96702	*	0.97999	*	0.98277	*	0.98098
Ko		10		10		10		10		10		10		10		10	*	18.635
Ks	*	0.068605	*	0.0705	*	0.033738	*	0.03665	*	0.061607	*	0.074489	*	0.056644	*	0.078483	*	0.075835
Ksq		1.0667	*	0.59751		1.0667	*	1.9228	*	1.9293	*	1.9123	*	1.9425	*	1.9352	*	1.9138
Yam	*	0.4037	*	0.40667	*	0.41058	*	0.46441	*	0.44569	*	0.44669	*	0.43839	*	0.43468	*	0.44219
Yaof	*	0.32064	*	0.32637	*	0.20568	*	0.22324	*	0.20868	*	0.21002	*	0.20998	*	0.21065	*	0.21454
Yaresp	*	0.089994	*	0.084524	*	0.13986	*	0.12901	*	0.11931	*	0.1289	*	0.12749	*	0.12634	*	0.12438
Yem	*	0.58881	*	0.50949	*	0.54949	*	0.59388	*	0.56488	*	0.57574	*	0.58532	*	0.58417	*	0.58495
Yofm		0.2795		0.2795	*	0.20532	*	0.25832	*	0.21048	*	0.21233	*	0.21146	*	0.21187	*	0.21286
Yosresp		1	*	1.3954	*	1.7174	*	1.6728	*	1.2336	*	1.2634	*	1.6866	*	1.6304	*	1.8004
kLa		280		280		280		280		280		280		280		280		280
pAmax		1.3091		1.3091	*	1.0496	*	1.0939	*	0.81978	*	0.77387	*	0.9066	*	0.85698	*	0.85578
qAmax	*	0.50762		1.0252	*	1.2911	*	0.9939	*	0.63766	*	0.59356	*	0.61971	*	0.56726	*	0.5627
qSmax	*	1.4606	*	1.0542	*	1.5045	*	1.4468	*	1.4438	*	1.4402	*	1.4545	*	1.4636	*	1.4718
qm		0.04		0.04		0.04		0.04		0.04		0.04		0.04		0.04		0.04
* adajusted parameter

## Sheet: E. coli BW25113 ΔfliA
Escherichia coli BW25113 ΔfliA
	MC 1		MC 2		MC 3		MC 4		MC 5		MC 6		MC 7		MC 8		MC 9
Parameter	SSS	Par	SSS	Par	SSS	Par	SSS	Par	SSS	Par	SSS	Par	SSS	Par	SSS	Par	SSS	Par
Kap		4.4447		4.4447		4.4447		4.4447		4.4447		4.4447		4.4447		4.4447		4.4447
Kaq	*	0.99014	*	0.92488	*	0.99437	*	0.97711	*	0.98302	*	0.98349	*	0.79432	*	0.70083	*	0.59664
Ko		10		10		10		10		10	*	18.526	*	19.822	*	18.772	*	16.294
Ks	*	0.050728	*	0.070508	*	0.087301	*	0.081574	*	0.056939	*	0.067988	*	0.036243	*	0.034756	*	0.032155
Ksq		1.0667		1.0667	*	1.9711	*	1.891	*	1.8959	*	1.8322	*	1.933	*	1.8907	*	1.7665
Yam	*	0.41044	*	0.43765	*	0.43472	*	0.59425	*	0.58648	*	0.59622	*	0.66356	*	0.53647	*	0.48161
Yaof	*	0.31498	*	0.2679	*	0.20416	*	0.21852	*	0.21435	*	0.22148	*	0.20236	*	0.20795	*	0.21288
Yaresp	*	0.052727	*	0.059049	*	0.14844	*	0.14191	*	0.14174	*	0.14258	*	0.14918	*	0.14662	*	0.146
Yem	*	0.5641	*	0.52856	*	0.59794	*	0.59539	*	0.59476	*	0.59677	*	0.59949	*	0.59785	*	0.59763
Yofm		0.2795	*	0.3938	*	0.20797	*	0.26287	*	0.2474	*	0.27928	*	0.24218	*	0.22695	*	0.23318
Yosresp		1		1	*	0.71606	*	0.75075	*	0.77111	*	0.90534	*	1.1471	*	1.5457	*	1.7621
kLa		280		280		280		280		280		280		280		280		280
pAmax	*	1.1013	*	1.0468	*	0.55764	*	0.62073	*	0.62057	*	0.60557	*	0.67429	*	0.85175	*	0.94715
qAmax	*	0.51989	*	0.52304	*	0.51343	*	0.5614	*	0.53462	*	0.53697	*	0.52155	*	0.64562	*	0.71948
qSmax	*	1.335	*	1.3659	*	1.597	*	1.5571	*	1.5371	*	1.5615	*	1.552	*	1.5896	*	1.5942
qm		0.04		0.04		0.04		0.04		0.04		0.04		0.04		0.04		0.04
* adajusted parameter

## Sheet: E. coli BW25113 ΔgatC
Escherichia coli BW25113 ΔgatC
	MC 1		MC 2		MC 3		MC 4		MC 5		MC 6		MC 7		MC 8		MC 9
Parameter	SSS	Par	SSS	Par	SSS	Par	SSS	Par	SSS	Par	SSS	Par	SSS	Par	SSS	Par	SSS	Par
Kap		4.4447		4.4447		4.4447		4.4447		4.4447		4.4447		4.4447		4.4447		4.4447
Kaq	*	0.95166	*	0.90693	*	0.80228	*	0.91842	*	0.97349	*	0.99255	*	0.8802	*	0.87439	*	0.68198
Ko		10		10		10		10		10		10	*	17.829	*	16.729	*	15.998
Ks	*	0.069029	*	0.066691	*	0.041464	*	0.03261	*	0.034361	*	0.031229	*	0.034621	*	0.033893	*	0.030616
Ksq		1.0667	*	0.41139		1.0667	*	1.9565	*	1.9667	*	1.9924	*	1.9379	*	1.9471	*	1.9887
Yam	*	0.46543	*	0.45859	*	0.4381	*	0.42148	*	0.41536	*	0.40446	*	0.44492	*	0.44847	*	0.44148
Yaof	*	0.30692	*	0.31774	*	0.21103	*	0.20407	*	0.20271	*	0.20082	*	0.2052	*	0.2049	*	0.20153
Yaresp	*	0.0574	*	0.074253	*	0.10121	*	0.11654	*	0.12532	*	0.14813	*	0.14472	*	0.14559	*	0.14838
Yem	*	0.51629	*	0.51874	*	0.53773	*	0.56595	*	0.53794	*	0.59754	*	0.59578	*	0.59615	*	0.59937
Yofm	*	0.33306		0.2795	*	0.21291	*	0.20569	*	0.20315	*	0.20149	*	0.21101	*	0.21117	*	0.21244
Yosresp		1	*	1.1598	*	1.0113	*	0.85579	*	0.75294	*	0.84761	*	1.286	*	1.6693	*	1.9677
kLa		280		280		280		280		280		280		280		280		280
pAmax	*	1.3231	*	1.4515	*	1.0004	*	0.86132	*	0.80518	*	0.71703	*	0.84592	*	0.93174	*	0.97723
qAmax	*	0.56974	*	0.58006	*	0.95459	*	0.72044	*	0.65294	*	0.56847	*	0.64869	*	0.72521	*	0.67866
qSmax	*	1.2236	*	1.2959	*	1.5434	*	1.5275	*	1.5183	*	1.4929	*	1.5195	*	1.5244	*	1.5477
qm		0.04		0.04		0.04		0.04		0.04		0.04		0.04		0.04		0.04
* adajusted parameter

## Sheet: E. coli BW25113 ΔgatZ
Escherichia coli BW25113 ΔgatZ
	MC 1		MC 2		MC 3		MC 4		MC 5		MC 6		MC 7		MC 8		MC 9
Parameter	SSS	Par	SSS	Par	SSS	Par	SSS	Par	SSS	Par	SSS	Par	SSS	Par	SSS	Par	SSS	Par
Kap		4.4447		4.4447		4.4447		4.4447		4.4447		4.4447		4.4447		4.4447		4.4447
Kaq	*	0.98637	*	0.9642	*	0.83715	*	0.9668	*	0.93373	*	0.922	*	0.78926	*	0.70741	*	0.75444
Ko		10		10		10		10		10		10	*	13.263	*	13.206	*	14.132
Ks	*	0.073221	*	0.08503	*	0.075805	*	0.099284	*	0.054098	*	0.05626	*	0.042566	*	0.033071	*	0.039528
Ksq	*	1.0485	*	0.29164	*	1.7644	*	1.9729	*	1.8371	*	1.8335	*	1.7248	*	1.9057	*	1.6289
Yam	*	0.41284	*	0.42398	*	0.42968	*	0.40884	*	0.46133	*	0.4675	*	0.46434	*	0.43235	*	0.43533
Yaof	*	0.35302	*	0.30793	*	0.22159	*	0.20274	*	0.22326	*	0.22373	*	0.22913	*	0.20752	*	0.2315
Yaresp	*	0.064435	*	0.078698	*	0.081982	*	0.082994	*	0.087399	*	0.097217	*	0.11335	*	0.14295	*	0.13074
Yem	*	0.5637	*	0.51362	*	0.52724	*	0.52991	*	0.55877	*	0.57843	*	0.58174	*	0.59607	*	0.58392
Yofm		0.2795		0.2795	*	0.21429	*	0.20285	*	0.2347	*	0.2397	*	0.23619	*	0.22121	*	0.21518
Yosresp	*	0.76322	*	1.5978	*	1.1441	*	0.74248	*	0.87792	*	1.052	*	1.4329	*	1.6878	*	1.8884
kLa		280		280		280		280		280		280		280		280		280
pAmax	*	1.1682	*	1.5359	*	1.0093	*	0.70579	*	0.83304	*	0.8615	*	0.9952	*	0.94461	*	1.0784
qAmax	*	0.52591	*	0.55278	*	0.7976	*	0.58454	*	0.65773	*	0.6741	*	0.74625	*	0.63336	*	0.85505
qSmax	*	1.2054	*	1.3473	*	1.3503	*	1.3511	*	1.3392	*	1.3367	*	1.3526	*	1.3803	*	1.3873
qm		0.04		0.04		0.04		0.04		0.04		0.04		0.04		0.04		0.04
* adajusted parameter

## Sheet: E. coli BW25113 ΔglcB
Escherichia coli BW25113 ΔglcB
	MC 1		MC 2		MC 3		MC 4		MC 5		MC 6		MC 7		MC 8		MC 9
Parameter	SSS	Par	SSS	Par	SSS	Par	SSS	Par	SSS	Par	SSS	Par	SSS	Par	SSS	Par	SSS	Par
Kap		4.4447		4.4447		4.4447		4.4447		4.4447		4.4447		4.4447		4.4447		4.4447
Kaq	*	0.98025	*	0.97523	*	0.86177	*	0.87461	*	0.98689	*	0.95637	*	0.91653	*	0.85451	*	0.70235
Ko		10		10		10		10		10		10	*	16.531	*	13.318	*	9.5723
Ks	*	0.065595	*	0.078709	*	0.075582	*	0.064201	*	0.034537	*	0.045111	*	0.036308	*	0.04846	*	0.032471
Ksq		1.0667	*	0.38462	*	1.9282	*	1.8774	*	1.9839	*	1.9418	*	1.8972	*	1.6281	*	1.676
Yam	*	0.41916	*	0.42604	*	0.40431	*	0.47267	*	0.40544	*	0.41535	*	0.41446	*	0.4541	*	0.41813
Yaof	*	0.30969	*	0.39375	*	0.20656	*	0.21388	*	0.2022	*	0.20683	*	0.20933	*	0.22768	*	0.22508
Yaresp	*	0.065316	*	0.062968	*	0.078474	*	0.074836	*	0.10207	*	0.099904	*	0.11193	*	0.10575	*	0.12775
Yem	*	0.52168	*	0.51336	*	0.5068	*	0.52617	*	0.59864	*	0.59455	*	0.59065	*	0.57961	*	0.58714
Yofm		0.2795		0.2795		0.2795	*	0.21658	*	0.20854	*	0.21637	*	0.20715	*	0.23225	*	0.21842
Yosresp		1		1	*	1.4714	*	0.8591	*	0.70754	*	0.76623	*	0.97973	*	1.144	*	1.1901
kLa		280		280		280		280		280		280		280		280		280
pAmax	*	1.2129	*	1.4973	*	1.0458	*	0.86646	*	0.5966	*	0.65717	*	0.694	*	0.82847	*	0.86513
qAmax	*	0.5326	*	0.54376	*	0.97303	*	0.8148	*	0.538	*	0.60081	*	0.58921	*	0.71172	*	0.71471
qSmax	*	1.1078	*	1.0876	*	1.3181	*	1.3074	*	1.3502	*	1.3605	*	1.3909	*	1.3838	*	1.3955
qm		0.04		0.04		0.04		0.04		0.04		0.04		0.04		0.04		0.04
* adajusted parameter
